# Supplementary material for: Evolution of the Insertion-Deletion Mutation Rate Across the Tree of Life
Source: Oxford University Press journal article supplement (doi:10.1534/g3.116.030890), 2016-06-25
Supplement: 030890_datasets1.pdf [file 030890_datasets1.pdf]

## Dataset S1.

Base-substitution and insertion-deletion (indel) mutation summary statistics for the prokaryotes *Agrobacterium tumefaciens* (Agt), *Bacillus subtilis* (Bs), *Escherichia coli* (Ec), *Mesoplasma florum* (Mf), and *Vibrio cholerae* (Vc). SEM is the standard error. Ts/Tv is the transition/transversion ratio.

| MA<br>Line | Substitutions |       |               |       |       |       | Indels |      | Ts/Tv | Sites<br>( $\times 10^6$ ) | Gen. | Base-sub<br>Rate<br>( $\times 10^{-10}$ )<br>/site/gen. | Indel Rate<br>( $\times 10^{-10}$ )<br>/events<br>/gen. |
|------------|---------------|-------|---------------|-------|-------|-------|--------|------|-------|----------------------------|------|---------------------------------------------------------|---------------------------------------------------------|
|            | Transitions   |       | Transversions |       |       |       | Ins.   | Del. |       |                            |      |                                                         |                                                         |
|            | AT>GC         | GC>AT | AT>TA         | GC>TA | AT>CG | GC>CG |        |      |       |                            |      |                                                         |                                                         |
| Agt 2      | 2             | 6     | 1             | 0     | 2     | 3     | 0      | 1    | 1.33  | 5.45                       | 5842 | 4.40                                                    | 0.31                                                    |
| Agt 4      | 2             | 5     | 1             | 0     | 0     | 0     | 0      | 1    | 7.00  | 5.55                       | 5816 | 2.48                                                    | 0.31                                                    |
| Agt 5      | 1             | 5     | 0             | 1     | 1     | 1     | 0      | 3    | 2.00  | 5.66                       | 5816 | 2.73                                                    | 0.91                                                    |
| Agt 6      | 0             | 6     | 1             | 0     | 1     | 3     | 0      | 0    | 1.20  | 3.84                       | 5842 | 4.90                                                    | 0.00                                                    |
| Agt 7      | 1             | 1     | 1             | 2     | 2     | 3     | 1      | 2    | 0.25  | 5.66                       | 5842 | 3.02                                                    | 0.91                                                    |
| Agt 9      | 2             | 5     | 0             | 2     | 0     | 2     | 0      | 1    | 1.75  | 5.65                       | 5869 | 3.31                                                    | 0.30                                                    |
| Agt 10     | 3             | 8     | 0             | 3     | 1     | 4     | 0      | 1    | 1.38  | 5.45                       | 5816 | 5.99                                                    | 0.32                                                    |
| Agt 11     | 1             | 4     | 0             | 3     | 0     | 0     | 1      | 0    | 1.67  | 5.66                       | 5842 | 2.42                                                    | 0.30                                                    |
| Agt 13     | 4             | 3     | 0             | 2     | 1     | 2     | 0      | 0    | 1.40  | 5.64                       | 5789 | 3.68                                                    | 0.00                                                    |
| Agt 14     | 2             | 3     | 0             | 2     | 2     | 2     | 1      | 1    | 0.83  | 5.65                       | 5735 | 3.39                                                    | 0.62                                                    |
| Agt 15     | 1             | 3     | 0             | 2     | 2     | 0     | 0      | 0    | 1.00  | 5.66                       | 5842 | 2.42                                                    | 0.00                                                    |
| Agt 16     | 2             | 2     | 0             | 1     | 3     | 1     | 0      | 0    | 0.80  | 5.66                       | 5816 | 2.73                                                    | 0.00                                                    |
| Agt 17     | 2             | 4     | 0             | 4     | 0     | 0     | 0      | 0    | 1.50  | 5.56                       | 5842 | 3.08                                                    | 0.00                                                    |
| Agt 19     | 0             | 3     | 0             | 1     | 0     | 1     | 0      | 0    | 1.50  | 3.79                       | 5816 | 2.27                                                    | 0.00                                                    |
| Agt 20     | 3             | 3     | 1             | 0     | 0     | 0     | 1      | 0    | 6.00  | 5.66                       | 5869 | 2.11                                                    | 0.30                                                    |
| Agt 21     | 0             | 4     | 0             | 0     | 1     | 0     | 0      | 0    | 4.00  | 5.55                       | 5869 | 1.53                                                    | 0.00                                                    |
| Agt 22     | 0             | 2     | 0             | 3     | 0     | 1     | 0      | 0    | 0.50  | 5.66                       | 5842 | 1.81                                                    | 0.00                                                    |
| Agt 24     | 3             | 2     | 1             | 0     | 1     | 1     | 0      | 0    | 1.67  | 5.57                       | 5789 | 2.48                                                    | 0.00                                                    |
| Agt 25     | 1             | 3     | 1             | 0     | 0     | 2     | 1      | 1    | 1.33  | 5.64                       | 5816 | 2.13                                                    | 0.61                                                    |
| Agt 26     | 0             | 3     | 0             | 1     | 1     | 1     | 1      | 2    | 1.00  | 5.66                       | 5789 | 1.83                                                    | 0.91                                                    |
| Agt 27     | 0             | 0     | 3             | 1     | 0     | 2     | 0      | 0    | 0.00  | 5.66                       | 5842 | 1.81                                                    | 0.00                                                    |
| Agt 28     | 1             | 5     | 0             | 1     | 1     | 4     | 0      | 1    | 1.00  | 5.65                       | 5842 | 3.64                                                    | 0.30                                                    |
| Agt 29     | 4             | 4     | 1             | 3     | 0     | 0     | 1      | 0    | 2.00  | 5.57                       | 5762 | 3.74                                                    | 0.31                                                    |
| Agt 30     | 4             | 4     | 1             | 3     | 0     | 0     | 1      | 1    | 2.00  | 5.66                       | 5842 | 3.63                                                    | 0.60                                                    |
| Agt 32     | 1             | 8     | 2             | 1     | 1     | 0     | 1      | 0    | 2.25  | 5.55                       | 5816 | 4.03                                                    | 0.31                                                    |
| Agt 33     | 4             | 6     | 0             | 3     | 0     | 1     | 0      | 0    | 2.50  | 5.45                       | 5869 | 4.38                                                    | 0.00                                                    |
| Agt 34     | 1             | 4     | 0             | 0     | 0     | 1     | 1      | 0    | 5.00  | 3.77                       | 5869 | 2.71                                                    | 0.45                                                    |
| Agt 36     | 1             | 4     | 1             | 1     | 1     | 0     | 1      | 2    | 1.67  | 5.66                       | 5869 | 2.41                                                    | 0.90                                                    |
| Agt 37     | 1             | 2     | 0             | 2     | 0     | 0     | 0      | 0    | 1.50  | 5.66                       | 5735 | 1.54                                                    | 0.00                                                    |
| Agt 38     | 0             | 5     | 0             | 0     | 1     | 4     | 0      | 0    | 1.00  | 5.66                       | 5735 | 3.08                                                    | 0.00                                                    |
| Agt 39     | 1             | 3     | 0             | 1     | 0     | 2     | 1      | 0    | 1.33  | 5.66                       | 5816 | 2.12                                                    | 0.30                                                    |
| Agt 40     | 6             | 3     | 0             | 1     | 3     | 1     | 1      | 0    | 1.80  | 5.66                       | 5842 | 4.23                                                    | 0.30                                                    |
| Agt 41     | 1             | 1     | 1             | 3     | 0     | 1     | 0      | 0    | 0.40  | 5.63                       | 5816 | 2.14                                                    | 0.00                                                    |
| Agt 42     | 2             | 3     | 3             | 2     | 2     | 3     | 0      | 2    | 0.50  | 5.67                       | 5869 | 4.51                                                    | 0.60                                                    |
| Agt 43     | 3             | 4     | 1             | 2     | 0     | 3     | 0      | 0    | 1.17  | 5.66                       | 5842 | 3.93                                                    | 0.00                                                    |
| Agt 44     | 3             | 2     | 0             | 0     | 1     | 3     | 2      | 1    | 1.25  | 5.63                       | 5842 | 2.74                                                    | 0.91                                                    |
| Agt 45     | 0             | 2     | 0             | 0     | 0     | 0     | 1      | 0    | -     | 0.88                       | 5816 | 3.89                                                    | 1.95                                                    |
| Agt 46     | 1             | 0     | 1             | 1     | 0     | 1     | 0      | 2    | 0.33  | 5.65                       | 5789 | 1.22                                                    | 0.61                                                    |
| Agt 47     | 1             | 3     | 0             | 2     | 0     | 0     | 0      | 0    | 2.00  | 5.66                       | 5816 | 1.82                                                    | 0.00                                                    |
| Agt 48     | 1             | 1     | 1             | 2     | 0     | 0     | 0      | 0    | 0.67  | 5.66                       | 5816 | 1.52                                                    | 0.00                                                    |
| Agt 51     | 2             | 5     | 0             | 1     | 1     | 2     | 0      | 3    | 1.75  | 5.66                       | 5762 | 3.37                                                    | 0.92                                                    |
| Agt 53     | 0             | 1     | 1             | 2     | 0     | 4     | 1      | 1    | 0.14  | 5.66                       | 5842 | 2.42                                                    | 0.60                                                    |
| Agt 54     | 1             | 3     | 0             | 0     | 0     | 1     | 0      | 0    | 4.00  | 3.85                       | 5789 | 2.25                                                    | 0.00                                                    |
| Agt 55     | 3             | 4     | 0             | 1     | 1     | 1     | 1      | 2    | 2.33  | 5.63                       | 5816 | 3.05                                                    | 0.92                                                    |
| Agt 57     | 3             | 2     | 0             | 1     | 1     | 1     | 0      | 1    | 1.67  | 5.45                       | 5816 | 2.52                                                    | 0.32                                                    |
| Agt 58     | 0             | 3     | 0             | 1     | 2     | 2     | 0      | 1    | 0.60  | 5.65                       | 5708 | 2.48                                                    | 0.31                                                    |
| Agt 59     | 2             | 3     | 0             | 1     | 2     | 3     | 0      | 2    | 0.83  | 5.66                       | 5816 | 3.34                                                    | 0.61                                                    |
| Sum        | 77            | 160   | 23            | 63    | 35    | 67    | 18     | 32   | --    | --                         | --   | --                                                      | --                                                      |
| Ave.       | 1.64          | 3.40  | 0.49          | 1.34  | 0.74  | 1.43  | 0.38   | 0.68 | 1.69  | 5.37                       | 5819 | 2.92                                                    | 0.36                                                    |
| SEM        | 0.20          | 0.26  | 0.11          | 0.16  | 0.13  | 0.19  | 0.08   | 0.13 | 0.21  | 0.12                       | 5.74 | 0.15                                                    | 0.06                                                    |
| Bs 1       | 1             | 2     | 4             | 1     | 0     | 0     | 1      | 1    | 0.60  | 4.29                       | 5078 | 3.67                                                    | 0.92                                                    |
| Bs 2       | 5             | 2     | 0             | 0     | 2     | 0     | 1      | 0    | 3.50  | 4.29                       | 5059 | 4.15                                                    | 0.46                                                    |
| Bs 3       | 1             | 2     | 1             | 0     | 1     | 1     | 1      | 1    | 1.00  | 4.29                       | 5067 | 2.76                                                    | 0.92                                                    |

|       |      |      |      |      |      |      |      |      |      |      |      |      |      |
|-------|------|------|------|------|------|------|------|------|------|------|------|------|------|
| Bs 4  | 0    | 2    | 0    | 0    | 2    | 0    | 1    | 0    | 1.00 | 4.21 | 5100 | 1.86 | 0.47 |
| Bs 6  | 3    | 0    | 0    | 0    | 0    | 0    | 2    | 3    | -    | 4.29 | 5109 | 1.37 | 2.28 |
| Bs 7  | 5    | 4    | 0    | 0    | 1    | 0    | 1    | 0    | 9.00 | 4.21 | 5100 | 4.66 | 0.47 |
| Bs 8  | 3    | 1    | 0    | 1    | 1    | 1    | 1    | 3    | 1.33 | 4.20 | 5075 | 3.28 | 1.88 |
| Bs 11 | 1    | 4    | 0    | 0    | 0    | 0    | 1    | 0    | -    | 4.21 | 5067 | 2.34 | 0.47 |
| Bs 13 | 1    | 1    | 0    | 0    | 0    | 0    | 0    | 1    | -    | 4.21 | 5084 | 0.94 | 0.47 |
| Bs 14 | 5    | 1    | 0    | 1    | 1    | 0    | 0    | 1    | 3.00 | 4.29 | 5100 | 3.66 | 0.46 |
| Bs 15 | 3    | 3    | 0    | 0    | 3    | 0    | 1    | 0    | 2.00 | 4.29 | 5125 | 4.09 | 0.45 |
| Bs 17 | 4    | 3    | 2    | 2    | 2    | 0    | 1    | 2    | 1.17 | 4.29 | 5067 | 5.98 | 1.38 |
| Bs 19 | 1    | 2    | 2    | 0    | 1    | 0    | 0    | 2    | 1.00 | 4.29 | 5075 | 2.75 | 0.92 |
| Bs 20 | 2    | 3    | 0    | 0    | 0    | 0    | 0    | 3    | -    | 4.29 | 5042 | 2.31 | 1.39 |
| Bs 22 | 2    | 5    | 0    | 0    | 0    | 0    | 0    | 4    | -    | 4.21 | 5067 | 3.28 | 1.88 |
| Bs 24 | 3    | 4    | 2    | 0    | 0    | 0    | 1    | 2    | 3.50 | 4.29 | 5100 | 4.11 | 1.37 |
| Bs 26 | 3    | 1    | 0    | 1    | 3    | 0    | 1    | 3    | 1.00 | 4.21 | 5075 | 3.74 | 1.87 |
| Bs 27 | 2    | 2    | 0    | 0    | 0    | 1    | 0    | 3    | 4.00 | 4.29 | 5084 | 2.29 | 1.38 |
| Bs 28 | 1    | 1    | 1    | 0    | 0    | 0    | 0    | 3    | 2.00 | 4.29 | 5050 | 1.38 | 1.38 |
| Bs 30 | 2    | 4    | 0    | 0    | 0    | 1    | 0    | 3    | 6.00 | 4.21 | 5042 | 3.30 | 1.41 |
| Bs 31 | 5    | 2    | 0    | 0    | 0    | 0    | 1    | 2    | -    | 4.29 | 5050 | 3.23 | 1.38 |
| Bs 32 | 2    | 2    | 0    | 2    | 1    | 0    | 0    | 3    | 1.33 | 4.29 | 5100 | 3.20 | 1.37 |
| Bs 35 | 4    | 1    | 0    | 0    | 0    | 0    | 1    | 3    | -    | 4.29 | 5100 | 2.29 | 1.83 |
| Bs 36 | 0    | 5    | 0    | 1    | 0    | 0    | 1    | 3    | 5.00 | 4.21 | 5092 | 2.80 | 1.87 |
| Bs 37 | 1    | 3    | 0    | 0    | 0    | 1    | 0    | 2    | 4.00 | 4.29 | 5084 | 2.29 | 0.92 |
| Bs 38 | 2    | 2    | 2    | 0    | 1    | 0    | 1    | 2    | 1.33 | 4.21 | 5059 | 3.29 | 1.41 |
| Bs 39 | 4    | 5    | 1    | 1    | 0    | 0    | 0    | 4    | 4.50 | 4.29 | 5059 | 5.07 | 1.84 |
| Bs 40 | 1    | 2    | 0    | 2    | 0    | 0    | 0    | 2    | 1.50 | 4.29 | 5050 | 2.31 | 0.92 |
| Bs 41 | 2    | 1    | 0    | 1    | 0    | 0    | 1    | 1    | 3.00 | 4.21 | 5050 | 1.88 | 0.94 |
| Bs 43 | 4    | 5    | 0    | 0    | 0    | 0    | 0    | 3    | -    | 4.29 | 5109 | 4.11 | 1.37 |
| Bs 44 | 13   | 5    | 3    | 0    | 0    | 0    | 0    | 1    | 6.00 | 4.21 | 5109 | 9.77 | 0.47 |
| Bs 45 | 1    | 4    | 0    | 0    | 2    | 0    | 2    | 6    | 2.50 | 4.20 | 5100 | 3.26 | 3.73 |
| Bs 46 | 2    | 3    | 0    | 2    | 1    | 0    | 0    | 3    | 1.67 | 4.29 | 5067 | 3.68 | 1.38 |
| Bs 48 | 3    | 3    | 0    | 0    | 2    | 0    | 0    | 2    | 3.00 | 4.21 | 5050 | 3.77 | 0.94 |
| Bs 49 | 3    | 1    | 0    | 1    | 0    | 0    | 1    | 1    | 4.00 | 4.21 | 5050 | 2.35 | 0.94 |
| Bs 50 | 3    | 0    | 2    | 2    | 0    | 1    | 0    | 1    | 0.60 | 4.29 | 5042 | 3.70 | 0.46 |
| Bs 51 | 3    | 1    | 2    | 1    | 0    | 0    | 1    | 2    | 1.33 | 4.21 | 5042 | 3.30 | 1.41 |
| Bs 52 | 1    | 1    | 0    | 0    | 0    | 0    | 0    | 1    | -    | 4.29 | 5109 | 0.91 | 0.46 |
| Bs 53 | 4    | 4    | 1    | 1    | 0    | 0    | 0    | 0    | 4.00 | 4.21 | 5109 | 4.65 | 0.00 |
| Bs 54 | 3    | 5    | 0    | 2    | 0    | 1    | 1    | 2    | 2.67 | 4.21 | 5092 | 5.13 | 1.40 |
| Bs 55 | 7    | 4    | 0    | 0    | 2    | 1    | 2    | 2    | 3.67 | 4.21 | 5100 | 6.52 | 1.86 |
| Bs 57 | 3    | 3    | 0    | 0    | 0    | 0    | 0    | 1    | -    | 4.29 | 5092 | 2.75 | 0.46 |
| Bs 60 | 3    | 3    | 0    | 1    | 0    | 0    | 0    | 2    | 6.00 | 4.19 | 5075 | 3.29 | 0.94 |
| Bs 62 | 1    | 3    | 0    | 1    | 1    | 0    | 2    | 2    | 2.00 | 4.21 | 5075 | 2.81 | 1.87 |
| Bs 63 | 3    | 2    | 3    | 1    | 0    | 0    | 2    | 1    | 1.25 | 4.21 | 5075 | 4.21 | 1.40 |
| Bs 65 | 0    | 5    | 1    | 0    | 0    | 0    | 0    | 2    | 5.00 | 4.29 | 5067 | 2.76 | 0.92 |
| Bs 68 | 5    | 3    | 1    | 0    | 0    | 0    | 0    | 2    | 8.00 | 4.29 | 5059 | 4.15 | 0.92 |
| Bs 69 | 3    | 2    | 3    | 1    | 0    | 0    | 2    | 1    | 1.25 | 4.21 | 5075 | 4.21 | 1.40 |
| Bs 71 | 0    | 5    | 1    | 0    | 0    | 0    | 0    | 2    | 5.00 | 4.29 | 5067 | 2.76 | 0.92 |
| Bs 74 | 5    | 3    | 1    | 0    | 0    | 0    | 0    | 2    | 8.00 | 4.29 | 5059 | 4.15 | 0.92 |
| Sum   | 139  | 135  | 33   | 26   | 27   | 8    | 31   | 96   | --   | --   | --   | --   | --   |
| Ave.  | 2.78 | 2.70 | 0.66 | 0.52 | 0.54 | 0.16 | 0.62 | 1.92 | 3.17 | 4.25 | 5077 | 3.41 | 1.18 |
| SEM   | 0.31 | 0.21 | 0.15 | 0.10 | 0.12 | 0.05 | 0.10 | 0.17 | 0.31 | 0.01 | 3.16 | 0.21 | 0.09 |
| Ec 1  | 0    | 0    | 0    | 0    | 0    | 0    | 0    | 0    | -    | 4.62 | 3080 | 0.00 | 0.00 |
| Ec 5  | 0    | 1    | 0    | 0    | 0    | 0    | 0    | 0    | -    | 4.62 | 3080 | 0.70 | 0.00 |
| Ec 6  | 2    | 4    | 0    | 0    | 0    | 1    | 1    | 1    | 6.00 | 4.60 | 6356 | 2.40 | 0.68 |
| Ec 7  | 0    | 0    | 1    | 0    | 0    | 1    | 0    | 0    | 0.00 | 4.62 | 3080 | 1.41 | 0.00 |
| Ec 10 | 0    | 1    | 2    | 0    | 1    | 0    | 0    | 0    | 0.33 | 4.62 | 3080 | 2.81 | 0.00 |
| Ec 12 | 2    | 1    | 1    | 0    | 2    | 0    | 1    | 1    | 1.00 | 4.61 | 6356 | 2.05 | 0.68 |
| Ec 14 | 2    | 2    | 1    | 0    | 0    | 0    | 1    | 2    | 4.00 | 4.61 | 6356 | 1.71 | 1.02 |
| Ec 16 | 2    | 2    | 0    | 1    | 0    | 0    | 0    | 0    | 4.00 | 4.63 | 3080 | 3.51 | 0.00 |
| Ec 17 | 1    | 2    | 0    | 1    | 0    | 0    | 0    | 1    | 3.00 | 4.56 | 6356 | 1.38 | 0.35 |
| Ec 21 | 0    | 1    | 1    | 0    | 1    | 0    | 0    | 0    | 0.50 | 4.62 | 3080 | 2.11 | 0.00 |
| Ec 23 | 2    | 1    | 1    | 0    | 0    | 0    | 0    | 0    | 3.00 | 4.62 | 3080 | 2.81 | 0.00 |
| Ec 27 | 0    | 1    | 0    | 0    | 0    | 0    | 0    | 0    | -    | 4.62 | 3080 | 0.70 | 0.00 |
| Ec 28 | 2    | 3    | 1    | 0    | 4    | 0    | 0    | 2    | 1.00 | 4.62 | 6356 | 3.40 | 0.68 |
| Ec 29 | 4    | 4    | 0    | 1    | 0    | 1    | 0    | 1    | 4.00 | 4.61 | 6356 | 3.42 | 0.34 |
| Ec 35 | 0    | 3    | 0    | 2    | 2    | 0    | 0    | 1    | 0.75 | 4.59 | 6356 | 2.40 | 0.34 |
| Ec 38 | 0    | 1    | 1    | 0    | 1    | 2    | 1    | 1    | 0.25 | 4.62 | 6356 | 1.70 | 0.68 |
| Ec 39 | 4    | 5    | 2    | 0    | 1    | 0    | 1    | 1    | 3.00 | 4.62 | 6356 | 4.09 | 0.68 |

|        |      |      |      |      |      |      |      |      |      |      |        |      |      |
|--------|------|------|------|------|------|------|------|------|------|------|--------|------|------|
| Ec 41  | 1    | 2    | 0    | 3    | 1    | 1    | 0    | 0    | 0.60 | 4.61 | 6356   | 2.73 | 0.00 |
| Ec 42  | 0    | 0    | 0    | 0    | 0    | 0    | 0    | 0    | -    | 4.62 | 3080   | 0.00 | 0.00 |
| Ec 44  | 2    | 1    | 0    | 1    | 5    | 0    | 0    | 2    | 0.50 | 4.61 | 6356   | 3.07 | 0.68 |
| Ec 45  | 0    | 2    | 2    | 1    | 2    | 1    | 1    | 3    | 0.33 | 4.60 | 6356   | 2.74 | 1.37 |
| Ec 46  | 1    | 0    | 0    | 1    | 1    | 0    | 1    | 0    | 0.50 | 4.62 | 3080   | 2.11 | 0.70 |
| Ec 49  | 4    | 0    | 0    | 2    | 2    | 0    | 0    | 2    | 1.00 | 4.62 | 6356   | 2.72 | 0.68 |
| Ec 50  | 2    | 1    | 0    | 0    | 3    | 3    | 0    | 0    | 0.50 | 4.59 | 6356   | 3.08 | 0.00 |
| Ec 51  | 0    | 0    | 0    | 0    | 0    | 0    | 0    | 0    | -    | 4.62 | 3080   | 0.00 | 0.00 |
| Ec 53  | 1    | 0    | 1    | 0    | 1    | 1    | 0    | 2    | 0.33 | 4.62 | 3080   | 2.81 | 1.41 |
| Ec 55  | 0    | 2    | 0    | 0    | 0    | 1    | 0    | 0    | 2.00 | 4.62 | 3080   | 2.11 | 0.00 |
| Ec 58  | 0    | 0    | 0    | 0    | 0    | 0    | 0    | 0    | -    | 4.62 | 3080   | 0.00 | 0.00 |
| Ec 59  | 2    | 3    | 0    | 0    | 3    | 0    | 1    | 0    | 1.67 | 4.61 | 6356   | 2.73 | 0.34 |
| Ec 61  | 2    | 2    | 0    | 0    | 1    | 0    | 0    | 0    | 4.00 | 4.62 | 6356   | 1.70 | 0.00 |
| Ec 62  | 0    | 2    | 0    | 0    | 1    | 0    | 0    | 1    | 2.00 | 4.61 | 6356   | 1.02 | 0.34 |
| Ec 63  | 3    | 6    | 1    | 0    | 0    | 0    | 1    | 1    | 9.00 | 4.52 | 6356   | 3.48 | 0.70 |
| Ec 65  | 1    | 4    | 0    | 1    | 0    | 1    | 1    | 2    | 2.50 | 4.61 | 6356   | 2.39 | 1.02 |
| Ec 66  | 0    | 1    | 0    | 3    | 1    | 1    | 0    | 0    | 0.20 | 4.60 | 6356   | 2.05 | 0.00 |
| Ec 67  | 0    | 1    | 0    | 0    | 0    | 0    | 0    | 0    | -    | 4.62 | 3080   | 0.70 | 0.00 |
| Ec 68  | 0    | 3    | 0    | 0    | 1    | 0    | 0    | 0    | 3.00 | 4.62 | 3080   | 2.81 | 0.00 |
| Ec 69  | 0    | 1    | 0    | 1    | 0    | 0    | 0    | 0    | 1.00 | 4.62 | 3080   | 1.41 | 0.00 |
| Ec 70  | 1    | 0    | 1    | 2    | 0    | 0    | 0    | 0    | 0.33 | 4.58 | 3080   | 2.84 | 0.00 |
| Ec 71  | 1    | 0    | 0    | 0    | 1    | 0    | 1    | 0    | 1.00 | 4.62 | 3080   | 1.41 | 0.70 |
| Ec 74  | 0    | 5    | 0    | 0    | 0    | 0    | 0    | 1    | -    | 4.62 | 3080   | 3.52 | 0.70 |
| Ec 75  | 1    | 0    | 0    | 0    | 1    | 0    | 0    | 0    | 1.00 | 4.62 | 3080   | 1.41 | 0.00 |
| Ec 76  | 0    | 0    | 1    | 0    | 0    | 0    | 0    | 0    | 0.00 | 4.62 | 3080   | 0.70 | 0.00 |
| Ec 78  | 1    | 1    | 0    | 0    | 0    | 0    | 0    | 0    | -    | 4.62 | 3080   | 1.41 | 0.00 |
| Ec 80  | 0    | 1    | 0    | 2    | 0    | 0    | 0    | 1    | 0.50 | 4.60 | 3080   | 2.12 | 0.71 |
| Ec 81  | 0    | 3    | 0    | 1    | 0    | 0    | 1    | 0    | 3.00 | 4.62 | 3080   | 2.81 | 0.70 |
| Ec 82  | 0    | 1    | 0    | 1    | 1    | 1    | 0    | 0    | 0.33 | 4.62 | 3080   | 2.81 | 0.00 |
| Ec 83  | 0    | 2    | 1    | 0    | 0    | 0    | 0    | 0    | 2.00 | 4.62 | 3080   | 2.11 | 0.00 |
| Ec 84  | 0    | 0    | 0    | 1    | 1    | 0    | 0    | 0    | 0.00 | 4.62 | 3080   | 1.41 | 0.00 |
| Ec 85  | 0    | 3    | 2    | 3    | 0    | 0    | 0    | 0    | 0.60 | 4.62 | 3080   | 5.63 | 0.00 |
| Ec 86  | 0    | 0    | 0    | 0    | 2    | 0    | 1    | 0    | 0.00 | 4.62 | 3080   | 1.41 | 0.70 |
| Ec 87  | 0    | 0    | 0    | 2    | 0    | 0    | 0    | 0    | 0.00 | 4.62 | 3080   | 1.41 | 0.00 |
| Ec 89  | 0    | 1    | 0    | 0    | 0    | 0    | 1    | 0    | -    | 4.62 | 3080   | 0.70 | 0.70 |
| Ec 90  | 0    | 2    | 0    | 0    | 0    | 0    | 1    | 0    | -    | 4.62 | 3080   | 1.41 | 0.70 |
| Ec 92  | 1    | 0    | 0    | 0    | 0    | 1    | 0    | 3    | 1.00 | 4.62 | 3080   | 1.41 | 2.11 |
| Ec 93  | 1    | 0    | 0    | 0    | 0    | 0    | 0    | 0    | -    | 4.62 | 3080   | 0.70 | 0.00 |
| Ec 94  | 0    | 2    | 0    | 0    | 0    | 0    | 0    | 0    | -    | 4.62 | 3080   | 1.41 | 0.00 |
| Ec 96  | 0    | 1    | 0    | 1    | 0    | 0    | 0    | 1    | 1.00 | 4.62 | 3080   | 1.41 | 0.70 |
| Ec 99  | 1    | 2    | 0    | 0    | 3    | 1    | 1    | 0    | 0.75 | 4.61 | 3080   | 4.92 | 0.70 |
| Ec 100 | 0    | 0    | 0    | 0    | 0    | 0    | 2    | 0    | -    | 4.60 | 6356   | 0.00 | 0.68 |
| Sum    | 47   | 87   | 20   | 31   | 43   | 17   | 18   | 30   | --   | --   | --     | --   | --   |
| Ave.   | 0.80 | 1.47 | 0.34 | 0.53 | 0.73 | 0.29 | 0.31 | 0.51 | 1.59 | 4.61 | 4246   | 2.02 | 0.37 |
| SEM    | 0.13 | 0.17 | 0.07 | 0.10 | 0.13 | 0.07 | 0.06 | 0.09 | 0.21 | 0.00 | 182.67 | 0.14 | 0.05 |
| Mf 6   | 3    | 11   | 1    | 3    | 0    | 2    | 3    | 1    | 2.33 | 0.79 | 2332   | 1.08 | 0.22 |
| Mf 11  | 2    | 4    | 0    | 4    | 0    | 2    | 1    | 3    | 1.00 | 0.79 | 2353   | 0.64 | 0.21 |
| Mf 12  | 2    | 10   | 0    | 5    | 0    | 2    | 0    | 2    | 1.71 | 0.79 | 2396   | 1.00 | 0.11 |
| Mf 14  | 2    | 7    | 0    | 4    | 0    | 0    | 3    | 3    | 2.25 | 0.79 | 2353   | 0.70 | 0.32 |
| Mf 19  | 2    | 8    | 1    | 8    | 0    | 6    | 1    | 4    | 0.67 | 0.79 | 2268   | 1.39 | 0.28 |
| Mf 23  | 2    | 9    | 1    | 3    | 1    | 1    | 3    | 2    | 1.83 | 0.79 | 2290   | 0.94 | 0.28 |
| Mf 26  | 4    | 4    | 0    | 7    | 0    | 0    | 1    | 2    | 1.14 | 0.79 | 2311   | 0.82 | 0.16 |
| Mf 39  | 0    | 8    | 1    | 6    | 1    | 1    | 4    | 2    | 0.89 | 0.79 | 2374   | 0.90 | 0.32 |
| Mf 41  | 3    | 4    | 0    | 4    | 0    | 2    | 2    | 4    | 1.17 | 0.79 | 2374   | 0.69 | 0.32 |
| Mf 42  | 0    | 6    | 1    | 5    | 0    | 0    | 3    | 2    | 1.00 | 0.79 | 2353   | 0.64 | 0.27 |
| Mf 47  | 1    | 10   | 0    | 3    | 1    | 3    | 1    | 2    | 1.57 | 0.79 | 2374   | 0.96 | 0.16 |
| Mf 49  | 1    | 5    | 0    | 7    | 1    | 5    | 1    | 4    | 0.46 | 0.79 | 2353   | 1.02 | 0.27 |
| Mf 50  | 4    | 4    | 1    | 4    | 0    | 5    | 1    | 1    | 0.80 | 0.79 | 2332   | 0.98 | 0.11 |
| Mf 55  | 3    | 5    | 0    | 8    | 0    | 3    | 2    | 2    | 0.73 | 0.79 | 2396   | 1.00 | 0.21 |
| Mf 56  | 3    | 5    | 0    | 6    | 0    | 2    | 1    | 7    | 1.00 | 0.79 | 2374   | 0.85 | 0.43 |
| Mf 57  | 1    | 7    | 1    | 4    | 2    | 1    | 2    | 4    | 1.00 | 0.79 | 2353   | 0.86 | 0.32 |
| Mf 58  | 3    | 38   | 2    | 4    | 0    | 4    | 2    | 4    | 4.10 | 0.79 | 2374   | 2.73 | 0.32 |
| Mf 59  | 1    | 9    | 0    | 4    | 0    | 2    | 3    | 1    | 1.67 | 0.79 | 2374   | 0.85 | 0.21 |
| Mf 62  | 1    | 8    | 0    | 2    | 0    | 3    | 1    | 2    | 1.80 | 0.79 | 2374   | 0.74 | 0.16 |
| Mf 65  | 0    | 12   | 1    | 3    | 1    | 1    | 3    | 0    | 2.00 | 0.79 | 2353   | 0.97 | 0.16 |
| Mf 67  | 1    | 9    | 0    | 3    | 0    | 1    | 4    | 2    | 2.50 | 0.79 | 2353   | 0.75 | 0.32 |
| Mf 68  | 1    | 13   | 1    | 1    | 0    | 0    | 1    | 2    | 7.00 | 0.79 | 2374   | 0.85 | 0.16 |

|       |      |      |      |      |      |      |      |      |      |      |      |       |      |
|-------|------|------|------|------|------|------|------|------|------|------|------|-------|------|
| Mf 76 | 3    | 9    | 1    | 6    | 2    | 3    | 2    | 2    | 1.00 | 0.79 | 2310 | 1.31  | 0.22 |
| Mf 83 | 1    | 6    | 0    | 1    | 0    | 6    | 2    | 3    | 1.00 | 0.79 | 2332 | 0.76  | 0.27 |
| Mf 85 | 1    | 7    | 1    | 5    | 0    | 1    | 2    | 1    | 1.14 | 0.79 | 2353 | 0.80  | 0.16 |
| Mf 90 | 3    | 2    | 0    | 5    | 2    | 5    | 0    | 1    | 0.42 | 0.79 | 2311 | 0.93  | 0.05 |
| Mf 92 | 3    | 8    | 0    | 3    | 0    | 1    | 2    | 4    | 2.75 | 0.79 | 2374 | 0.80  | 0.32 |
| Mf 93 | 1    | 5    | 0    | 10   | 1    | 3    | 0    | 1    | 0.43 | 0.79 | 2396 | 1.05  | 0.05 |
| Mf 99 | 0    | 6    | 3    | 8    | 0    | 4    | 1    | 5    | 0.40 | 0.79 | 2311 | 1.15  | 0.33 |
| Sum   | 52   | 239  | 16   | 136  | 12   | 69   | 52   | 73   | --   | --   | --   | --    | --   |
| Ave.  | 1.79 | 8.24 | 0.55 | 4.69 | 0.41 | 2.38 | 1.79 | 2.52 | 1.58 | 0.79 | 2351 | 0.97  | 0.23 |
| SEM   | 0.22 | 1.17 | 0.14 | 0.40 | 0.13 | 0.33 | 0.21 | 0.28 | 0.25 | 0.00 | 5.98 | 0.07  | 0.02 |
| Se 2  | 1    | 4    | 0    | 7    | 1    | 0    | 2    | 0    | 0.63 | 2.56 | 7103 | 7.16  | 1.10 |
| Se 3  | 1    | 2    | 3    | 5    | 0    | 1    | 1    | 0    | 0.33 | 2.54 | 7103 | 6.65  | 0.55 |
| Se 4  | 2    | 7    | 6    | 1    | 1    | 0    | 2    | 0    | 1.13 | 2.54 | 7103 | 9.44  | 1.11 |
| Se 7  | 4    | 4    | 4    | 6    | 0    | 0    | 1    | 0    | 0.80 | 2.54 | 7053 | 10.06 | 0.56 |
| Se 8  | 1    | 5    | 1    | 1    | 0    | 0    | 1    | 2    | 3.00 | 2.55 | 7053 | 4.44  | 1.66 |
| Se 10 | 4    | 4    | 2    | 7    | 1    | 0    | 2    | 1    | 0.80 | 2.55 | 7103 | 9.95  | 1.66 |
| Se 11 | 2    | 2    | 1    | 6    | 0    | 0    | 2    | 0    | 0.57 | 2.55 | 7128 | 6.06  | 1.10 |
| Se 12 | 3    | 3    | 1    | 4    | 1    | 0    | 4    | 0    | 1.00 | 2.55 | 7103 | 6.62  | 2.21 |
| Se 13 | 0    | 8    | 3    | 2    | 0    | 0    | 1    | 2    | 1.60 | 2.55 | 7128 | 7.14  | 1.65 |
| Se 34 | 0    | 2    | 3    | 4    | 0    | 1    | 1    | 3    | 0.25 | 2.54 | 7103 | 5.55  | 2.22 |
| Se 38 | 2    | 3    | 1    | 4    | 1    | 1    | 0    | 0    | 0.71 | 2.56 | 7103 | 6.61  | 0.00 |
| Se 39 | 2    | 5    | 3    | 3    | 0    | 0    | 2    | 3    | 1.17 | 2.52 | 7103 | 7.27  | 2.79 |
| Se 50 | 2    | 2    | 2    | 4    | 4    | 0    | 0    | 2    | 0.40 | 2.53 | 7128 | 7.75  | 1.11 |
| Se 59 | 2    | 8    | 2    | 2    | 3    | 2    | 0    | 0    | 1.11 | 2.55 | 7128 | 10.45 | 0.00 |
| Se 62 | 2    | 8    | 4    | 4    | 3    | 0    | 0    | 0    | 0.91 | 2.55 | 7103 | 11.57 | 0.00 |
| Se 63 | 0    | 0    | 0    | 1    | 3    | 0    | 0    | 0    | 0.00 | 2.56 | 7128 | 2.20  | 0.00 |
| Se 65 | 0    | 0    | 1    | 0    | 0    | 1    | 0    | 2    | 0.00 | 2.55 | 7103 | 1.10  | 1.10 |
| Se 66 | 2    | 6    | 2    | 2    | 0    | 0    | 1    | 2    | 2.00 | 2.55 | 7103 | 6.62  | 1.65 |
| Se 67 | 1    | 1    | 1    | 3    | 1    | 1    | 1    | 2    | 0.33 | 2.55 | 7103 | 4.41  | 1.65 |
| Se 69 | 0    | 6    | 4    | 3    | 0    | 0    | 0    | 1    | 0.86 | 2.54 | 7103 | 7.19  | 0.55 |
| Se 70 | 3    | 6    | 4    | 4    | 1    | 0    | 0    | 1    | 1.00 | 2.55 | 7078 | 9.99  | 0.55 |
| Se 75 | 0    | 9    | 5    | 6    | 2    | 4    | 2    | 1    | 0.53 | 2.53 | 7053 | 14.57 | 1.68 |
| Sum   | 34   | 95   | 53   | 79   | 22   | 11   | 23   | 22   | --   | --   | --   | --    | --   |
| Ave.  | 1.55 | 4.32 | 2.41 | 3.59 | 1.00 | 0.50 | 1.05 | 1.00 | 0.87 | 2.55 | 7101 | 7.40  | 1.13 |
| SEM   | 0.28 | 0.59 | 0.35 | 0.44 | 0.27 | 0.21 | 0.23 | 0.23 | 0.15 | 0.00 | 5.05 | 0.66  | 0.17 |
| Vc 1  | 0    | 4    | 0    | 0    | 0    | 0    | 0    | 1    | -    | 3.83 | 6453 | 1.62  | 0.40 |
| Vc 4  | 0    | 2    | 1    | 1    | 0    | 0    | 0    | 1    | 1.00 | 3.83 | 6453 | 1.62  | 0.40 |
| Vc 5  | 1    | 0    | 0    | 1    | 0    | 0    | 0    | 0    | 1.00 | 3.82 | 6453 | 0.81  | 0.00 |
| Vc 7  | 0    | 0    | 0    | 0    | 0    | 0    | 0    | 1    | -    | 3.83 | 6453 | 0.00  | 0.40 |
| Vc 8  | 0    | 1    | 0    | 1    | 0    | 0    | 0    | 0    | 1.00 | 3.83 | 6453 | 0.81  | 0.00 |
| Vc 9  | 0    | 2    | 0    | 0    | 0    | 0    | 0    | 1    | -    | 3.83 | 6453 | 0.81  | 0.40 |
| Vc 10 | 1    | 1    | 0    | 0    | 0    | 0    | 0    | 0    | -    | 3.84 | 6453 | 0.81  | 0.00 |
| Vc 11 | 0    | 2    | 0    | 0    | 1    | 0    | 0    | 0    | 2.00 | 3.82 | 6453 | 1.22  | 0.00 |
| Vc 15 | 0    | 0    | 0    | 0    | 0    | 0    | 0    | 0    | -    | 3.81 | 6453 | 0.00  | 0.00 |
| Vc 16 | 1    | 2    | 1    | 0    | 0    | 1    | 0    | 0    | 1.50 | 3.82 | 6453 | 2.03  | 0.00 |
| Vc 17 | 1    | 1    | 0    | 1    | 0    | 0    | 0    | 0    | 2.00 | 3.83 | 6453 | 1.21  | 0.00 |
| Vc 19 | 0    | 1    | 0    | 3    | 1    | 0    | 0    | 0    | 0.25 | 3.80 | 6453 | 2.04  | 0.00 |
| Vc 20 | 0    | 1    | 0    | 0    | 0    | 0    | 0    | 0    | -    | 3.82 | 6453 | 0.41  | 0.00 |
| Vc 22 | 0    | 3    | 0    | 0    | 0    | 0    | 0    | 0    | -    | 3.82 | 6453 | 1.22  | 0.00 |
| Vc 23 | 0    | 4    | 0    | 1    | 0    | 0    | 0    | 1    | 4.00 | 3.83 | 6453 | 2.02  | 0.40 |
| Vc 25 | 0    | 1    | 0    | 1    | 0    | 0    | 0    | 1    | 1.00 | 3.81 | 6453 | 0.81  | 0.41 |
| Vc 26 | 0    | 0    | 1    | 1    | 0    | 0    | 0    | 1    | 0.00 | 3.82 | 6453 | 0.81  | 0.41 |
| Vc 27 | 0    | 0    | 0    | 0    | 0    | 0    | 0    | 0    | -    | 3.83 | 6453 | 0.00  | 0.00 |
| Vc 28 | 0    | 1    | 0    | 0    | 0    | 0    | 0    | 0    | -    | 3.83 | 6453 | 0.40  | 0.00 |
| Vc 29 | 1    | 0    | 0    | 0    | 1    | 0    | 1    | 0    | 1.00 | 3.80 | 6453 | 0.81  | 0.41 |
| Vc 30 | 0    | 2    | 0    | 0    | 2    | 0    | 0    | 0    | 1.00 | 3.84 | 6453 | 1.62  | 0.00 |
| Vc 31 | 0    | 2    | 0    | 3    | 2    | 0    | 0    | 0    | 0.40 | 3.84 | 6453 | 2.83  | 0.00 |
| Vc 32 | 1    | 0    | 0    | 0    | 0    | 0    | 0    | 1    | -    | 3.84 | 6453 | 0.40  | 0.40 |
| Vc 33 | 1    | 2    | 1    | 1    | 0    | 0    | 0    | 0    | 1.50 | 3.84 | 6453 | 2.02  | 0.00 |
| Vc 34 | 0    | 2    | 0    | 1    | 0    | 1    | 0    | 0    | 1.00 | 3.83 | 6453 | 1.62  | 0.00 |
| Vc 35 | 1    | 2    | 0    | 0    | 1    | 1    | 0    | 0    | 1.50 | 3.83 | 6453 | 2.02  | 0.00 |
| Vc 37 | 0    | 1    | 0    | 1    | 0    | 0    | 0    | 0    | 1.00 | 3.83 | 6453 | 0.81  | 0.00 |
| Vc 39 | 0    | 3    | 2    | 1    | 1    | 0    | 0    | 1    | 0.75 | 3.83 | 6453 | 2.83  | 0.40 |
| Vc 41 | 0    | 0    | 0    | 1    | 0    | 0    | 0    | 0    | 0.00 | 3.82 | 6453 | 0.41  | 0.00 |
| Vc 43 | 1    | 1    | 1    | 0    | 0    | 0    | 0    | 0    | 2.00 | 3.84 | 6453 | 1.21  | 0.00 |
| Vc 45 | 1    | 2    | 0    | 0    | 0    | 1    | 0    | 0    | 3.00 | 3.83 | 6453 | 1.62  | 0.00 |
| Vc 47 | 0    | 2    | 0    | 1    | 0    | 0    | 1    | 0    | 2.00 | 3.84 | 6453 | 1.21  | 0.40 |

|       |      |      |      |      |      |      |      |      |      |      |      |      |      |
|-------|------|------|------|------|------|------|------|------|------|------|------|------|------|
| Vc 48 | 1    | 2    | 0    | 1    | 1    | 1    | 0    | 0    | 1.00 | 3.81 | 6453 | 2.44 | 0.00 |
| Vc 49 | 1    | 0    | 0    | 1    | 0    | 0    | 0    | 1    | 1.00 | 3.82 | 6453 | 0.81 | 0.41 |
| Vc 51 | 0    | 2    | 0    | 0    | 2    | 0    | 0    | 1    | 1.00 | 3.83 | 6453 | 1.62 | 0.40 |
| Vc 52 | 0    | 0    | 0    | 0    | 1    | 0    | 0    | 0    | 0.00 | 3.84 | 6453 | 0.40 | 0.00 |
| Vc 53 | 0    | 1    | 0    | 0    | 2    | 0    | 1    | 1    | 0.50 | 3.82 | 6453 | 1.22 | 0.81 |
| Vc 57 | 1    | 1    | 0    | 0    | 1    | 0    | 0    | 1    | 2.00 | 3.82 | 6453 | 1.22 | 0.41 |
| Vc 58 | 0    | 0    | 0    | 0    | 0    | 0    | 0    | 1    | -    | 3.84 | 6453 | 0.00 | 0.40 |
| Vc 59 | 1    | 3    | 0    | 0    | 1    | 0    | 0    | 0    | 4.00 | 3.83 | 6453 | 2.02 | 0.00 |
| Vc 61 | 1    | 0    | 0    | 0    | 1    | 0    | 0    | 0    | 1.00 | 3.84 | 6453 | 0.81 | 0.00 |
| Vc 63 | 1    | 2    | 0    | 0    | 0    | 0    | 0    | 1    | -    | 3.83 | 6453 | 1.21 | 0.40 |
| Vc 65 | 0    | 0    | 0    | 1    | 0    | 1    | 0    | 1    | 0.00 | 3.82 | 6453 | 0.81 | 0.41 |
| Vc 66 | 0    | 0    | 0    | 1    | 0    | 0    | 0    | 0    | 0.00 | 3.83 | 6453 | 0.40 | 0.00 |
| Vc 68 | 1    | 0    | 0    | 0    | 0    | 0    | 0    | 0    | -    | 3.82 | 6453 | 0.41 | 0.00 |
| Vc 70 | 1    | 2    | 0    | 0    | 1    | 0    | 0    | 1    | 3.00 | 3.83 | 6453 | 1.62 | 0.40 |
| Sum   | 18   | 58   | 7    | 23   | 19   | 6    | 3    | 17   | --   | --   | --   | --   | --   |
| Ave.  | 0.39 | 1.26 | 0.15 | 0.50 | 0.41 | 0.13 | 0.07 | 0.37 | 1.28 | 3.83 | 6453 | 1.15 | 0.18 |
| SEM   | 0.07 | 0.17 | 0.06 | 0.11 | 0.10 | 0.05 | 0.04 | 0.07 | 0.16 | 0.00 | 0.00 | 0.11 | 0.03 |
