# Supplementary material for: Evolution of the Insertion-Deletion Mutation Rate Across the Tree of Life
Source: Oxford University Press journal article supplement (doi:10.1534/g3.116.030890), 2016-06-25
Supplement: 030890_datasets3.pdf [file 030890_datasets3.pdf]

### Dataset S3.

List of base-substitution mutation calls for *Agrobacterium tumefaciens* (Agt), *Bacillus subtilis* (Bs), *Escherichia coli* (Ec), *Mesoplasma florum* (Mf), and *Vibrio cholerae* (Vc). Line column indicates the organism and MA line where indel is called seperated by (|). IG - intergenic, EX - exon, syn - synonymous, nonsyn - nonsynonymous. Gene is the gene name or type of gene where the base substitution occurs. Confirmed (conf.) column indicates if the mutation was verified using direct sequencing (seq).

| Line   | Scaffold:Position | Mut | Type | Codon Change | Amino Acid Change | Gene                | syn nonsyn | Conf. |
|--------|-------------------|-----|------|--------------|-------------------|---------------------|------------|-------|
| Agt 11 | NC_003062:2110    | G>T | EX   | GCG>TCG      | A>S               | shikimate           | nonsyn     |       |
| Agt 59 | NC_003064:3426    | A>G | EX   | GAG>GGG      | E>G               | replication         | nonsyn     |       |
| Agt 14 | NC_003065:6186    | G>A | EX   | GGG>GGA      | G>G               | C'                  | syn        |       |
| Agt 33 | NC_003062:7280    | G>A | EX   | GGC>AGC      | G>S               | hypothetical        | nonsyn     |       |
| Agt 55 | NC_003063:7913    | C>T | IG   |              |                   |                     |            |       |
| Agt 54 | NC_003062:9249    | G>A | EX   | GCC>ACC      | A>T               | DNA                 | nonsyn     |       |
| Agt 54 | NC_003062:10200   | G>C | EX   | GTT>CTT      | V>L               | DNA                 | nonsyn     |       |
| Agt 19 | NC_003062:13517   | C>T | EX   | GGC>GGT      | G>G               | intracellular       | syn        |       |
| Agt 13 | NC_003063:13737   | T>C | EX   | GTC>GCC      | V>A               | sugar               | nonsyn     |       |
| Agt 34 | NC_003062:15711   | C>T | EX   | ACC>ACT      | T>T               | tryptophan          | syn        |       |
| Agt 6  | NC_003065:18170   | C>G | EX   | CCG>CGG      | P>R               | tryptophan          | nonsyn     |       |
| Agt 20 | NC_003062:20222   | C>T | EX   | CCG>CCA      | P>P               | ATP-dependant       | syn        |       |
| Agt 25 | NC_003064:20373   | C>T | EX   | ATG>ATA      | M>I               | hypothetical        | nonsyn     |       |
| Agt 42 | NC_003065:23616   | T>A | EX   | GAA>GTA      | E>V               | D-nopaline          | nonsyn     |       |
| Agt 7  | NC_003062:38383   | C>A | EX   | GGC>GGA      | G>G               | phosphoenolpyruvate | syn        |       |
| Agt 20 | NC_003064:38970   | A>G | IG   |              |                   |                     |            |       |
| Agt 40 | NC_003063:40424   | G>A | EX   | GAA>AAA      | E>K               | hydantoinase        | nonsyn     |       |
| Agt 36 | NC_003063:41161   | A>G | EX   | ACG>GCG      | T>A               | asparaginase        | nonsyn     |       |
| Agt 33 | NC_003063:45990   | A>G | EX   | TGC>CGC      | C>R               | oligopeptide        | nonsyn     |       |
| Agt 55 | NC_003064:46303   | T>C | IG   |              |                   |                     |            |       |
| Agt 55 | NC_003065:46430   | C>A | EX   | GAG>TAG      | E>*               | conjugal            | nonsyn     |       |
| Agt 51 | NC_003062:47306   | C>G | EX   | GGC>GGG      | G>G               | hypothetical        | syn        |       |
| Agt 10 | NC_003063:51054   | A>G | EX   | ATG>ACG      | M>T               | peptide             | nonsyn     |       |
| Agt 43 | NC_003063:53886   | G>A | EX   | GTC>GTT      | V>V               | hypothetical        | syn        |       |
| Agt 40 | NC_003062:54600   | C>T | EX   | CTG>CTA      | L>L               | helicase            | syn        |       |
| Agt 24 | NC_003065:56650   | T>G | EX   | GCA>GCC      | A>A               | DNA                 | syn        |       |
| Agt 51 | NC_003063:58636   | C>A | IG   |              |                   |                     |            |       |
| Agt 22 | NC_003065:69034   | C>G | EX   | CCA>CGA      | P>R               | ABC                 | nonsyn     |       |
| Agt 2  | NC_003064:69952   | C>T | IG   |              |                   |                     |            |       |
| Agt 45 | NC_003062:79525   | G>A | EX   | CCG>TCG      | P>S               | D-isomer            | nonsyn     |       |
| Agt 30 | NC_003065:81832   | C>T | EX   | GTA>ATA      | V>I               | ABC                 | nonsyn     |       |
| Agt 53 | NC_003064:101622  | G>C | EX   | CTC>CTG      | L>L               | ATP-dependent       | syn        |       |
| Agt 5  | NC_003062:105414  | C>T | IG   |              |                   |                     |            |       |
| Agt 40 | NC_003065:107215  | T>C | EX   | GAT>GAC      | D>D               | hypothetical        | syn        |       |
| Agt 48 | NC_003063:108500  | G>A | EX   | ACC>ATC      | T>I               | sugar               | nonsyn     |       |
| Agt 54 | NC_003063:113162  | T>C | IG   |              |                   |                     |            |       |
| Agt 16 | NC_003064:118893  | A>C | EX   | ATC>CTC      | I>L               | conjugal            | nonsyn     |       |
| Agt 2  | NC_003064:124727  | A>T | EX   | GTG>GAG      | V>E               | hypothetical        | nonsyn     |       |
| Agt 55 | NC_003064:124997  | T>C | IG   |              |                   |                     |            |       |
| Agt 46 | NC_003065:125393  | A>T | EX   | GAT>GTT      | D>V               | SNF2                | nonsyn     |       |
| Agt 33 | NC_003063:125935  | A>G | IG   |              |                   |                     |            |       |
| Agt 43 | NC_003064:129638  | G>T | EX   | CCC>ACC      | P>T               | acetolactate        | nonsyn     |       |
| Agt 17 | NC_003064:133911  | G>T | EX   | GGG>TGG      | G>W               | ABC                 | nonsyn     |       |
| Agt 9  | NC_003063:133957  | C>A | EX   | GCA>TCA      | A>S               | acetyltransferase   | nonsyn     |       |

|        |                  |     |    |         |     |                                    |        |
|--------|------------------|-----|----|---------|-----|------------------------------------|--------|
| Agt 14 | NC_003065:134655 | G>T | EX | ACC>ACA | T>T | hypothetical                       | syn    |
| Agt 9  | NC_003062:138112 | G>A | EX | ACC>ACT | T>T | hypothetical                       | syn    |
| Agt 10 | NC_003063:146320 | G>A | EX | GCC>GCT | A>A | hypothetical                       | syn    |
| Agt 41 | NC_003062:148488 | C>A | EX | ATC>ATA | I>I | hypothetical                       | syn    |
| Agt 9  | NC_003063:149329 | G>A | EX | GCC>GTC | A>V | 2-deoxy-D-gluconate                | nonsyn |
| Agt 53 | NC_003063:150802 | A>T | IG |         |     |                                    |        |
| Agt 7  | NC_003062:157731 | C>T | EX | CCG>CCA | P>P | enoyl-(acyl-carrier-protein)       | syn    |
| Agt 5  | NC_003065:161987 | T>C | EX | TTG>TCG | L>S | ABC                                | nonsyn |
| Agt 2  | NC_003062:163548 | G>A | EX | CCG>CCA | P>P | ABC                                | syn    |
| Agt 32 | NC_003062:164790 | C>T | EX | ATC>ATT | I>I | ABC                                | syn    |
| Agt 22 | NC_003065:165904 | G>T | EX | GAT>TAT | D>Y | hypothetical                       | nonsyn |
| Agt 59 | NC_003065:169532 | G>C | EX | TGG>TCG | W>S | P-450                              | nonsyn |
| Agt 25 | NC_003063:170691 | G>A | EX | ATC>ATT | I>I | hypothetical                       | syn    |
| Agt 30 | NC_003062:173021 | C>A | EX | GTT>TTT | V>F | hypothetical                       | nonsyn |
| Agt 16 | NC_003064:183921 | T>G | IG |         |     |                                    |        |
| Agt 42 | NC_003063:194294 | A>C | IG |         |     |                                    |        |
| Agt 16 | NC_003063:196816 | C>A | EX | GCC>GCA | A>A | glycerol-3-phosphate               | syn    |
| Agt 40 | NC_003065:197439 | G>T | EX | GCA>TCA | A>S | type                               | nonsyn |
| Agt 47 | NC_003062:208230 | C>T | IG |         |     |                                    |        |
| Agt 15 | NC_003065:210421 | G>A | IG |         |     |                                    |        |
| Agt 44 | NC_003062:215751 | A>C | EX | ACC>CCC | T>P | hypothetical                       | nonsyn |
| Agt 17 | NC_003063:221868 | G>A | EX | GGC>GAC | G>D | diguanylate                        | nonsyn |
| Agt 59 | NC_003063:226233 | T>C | IG |         |     |                                    |        |
| Agt 53 | NC_003064:241750 | G>T | EX | CCC>CCA | P>P | amidase                            | syn    |
| Agt 33 | NC_003064:247699 | G>A | EX | GCC>GCT | A>A | pyridoxal                          | syn    |
| Agt 30 | NC_003063:250757 | G>A | EX | ACC>ATC | T>I | NAD                                | nonsyn |
| Agt 29 | NC_003062:252718 | T>C | IG |         |     |                                    |        |
| Agt 10 | NC_003064:252969 | C>T | EX | GCT>GTT | A>V | ABC                                | nonsyn |
| Agt 19 | NC_003064:253000 | C>T | EX | ACC>ACT | T>T | ABC                                | syn    |
| Agt 11 | NC_003063:256863 | G>A | IG |         |     |                                    |        |
| Agt 16 | NC_003064:271545 | T>C | EX | CGA>CGG | R>R | hypothetical                       | syn    |
| Agt 40 | NC_003064:276193 | T>C | EX | GAT>GGT | D>G | dehydrogenase                      | nonsyn |
| Agt 43 | NC_003064:287122 | G>A | EX | GGA>AGA | G>R | dehydrogenase                      | nonsyn |
| Agt 58 | NC_003064:288460 | C>T | EX | CTG>TTG | L>L | TetR                               | syn    |
| Agt 28 | NC_003064:291087 | C>T | EX | CCC>CCT | P>P | arylester                          | syn    |
| Agt 59 | NC_003062:291368 | G>A | EX | TTC>TTT | F>F | hypothetical                       | syn    |
| Agt 38 | NC_003063:292400 | G>A | EX | GTG>ATG | V>M | exopolysaccharide                  | nonsyn |
| Agt 43 | NC_003062:292441 | C>G | EX | GTG>CTG | V>L | hypothetical                       | nonsyn |
| Agt 33 | NC_003062:294372 | G>A | EX | GGC>GGT | G>G | DNA                                | syn    |
| Agt 59 | NC_003064:305818 | C>G | EX | CAC>GAC | H>D | TonB-dependent                     | nonsyn |
| Agt 57 | NC_003063:306404 | T>C | EX | ATC>ACC | I>T | ABC                                | nonsyn |
| Agt 55 | NC_003064:309783 | A>C | IG |         |     |                                    |        |
| Agt 10 | NC_003063:310028 | C>T | EX | CTG>TTG | L>L | sugar                              | syn    |
| Agt 11 | NC_003064:311752 | A>G | IG |         |     |                                    |        |
| Agt 51 | NC_003062:316640 | C>T | EX | CTG>TTG | L>L | 30S                                | syn    |
| Agt 41 | NC_003063:317684 | A>G | IG |         |     |                                    |        |
| Agt 7  | NC_003063:317823 | C>A | EX | GCC>GAC | A>D | alanine                            | nonsyn |
| Agt 28 | NC_003063:322604 | G>A | EX | CCC>CTC | P>L | two                                | nonsyn |
| Agt 16 | NC_003064:327134 | C>T | EX | ATC>ATT | I>I | dehydrogenase                      | syn    |
| Agt 24 | NC_003062:348534 | A>G | EX | AAC>AGC | N>S | ferric                             | nonsyn |
| Agt 21 | NC_003064:354538 | A>C | EX | TGC>GGC | C>G | aquaporin                          | nonsyn |
| Agt 13 | NC_003062:360745 | A>G | IG |         |     |                                    |        |
| Agt 32 | NC_003063:362300 | A>T | EX | GCT>GCA | A>A | hypothetical                       | syn    |
| Agt 27 | NC_003064:364836 | A>T | IG |         |     |                                    |        |
| Agt 44 | NC_003062:370135 | G>A | EX | GGC>GGT | G>G | inosine-uridine                    | syn    |
| Agt 30 | NC_003063:376491 | C>T | EX | GTC>GTT | V>V | trehalose/maltose                  | syn    |
| Agt 7  | NC_003063:390528 | T>A | EX | GGA>GGT | G>G | pyrroloquinoline-quinone-dependent | syn    |
| Agt 2  | NC_003064:399468 | T>G | IG |         |     |                                    |        |
| Agt 14 | NC_003064:400601 | A>C | IG |         |     |                                    |        |

|        |                  |     |    |         |     |                              |        |
|--------|------------------|-----|----|---------|-----|------------------------------|--------|
| Agt 20 | NC_003063:416529 | A>T | EX | TGG>AGG | W>R | peptide                      | nonsyn |
| Agt 14 | NC_003064:419113 | A>G | EX | GAC>GGC | D>G | oxidoreductase               | nonsyn |
| Agt 4  | NC_003064:423797 | C>T | IG |         |     |                              |        |
| Agt 59 | NC_003064:434276 | T>G | EX | CTT>CGT | L>R | ABC                          | nonsyn |
| Agt 40 | NC_003064:437254 | A>G | IG |         |     |                              |        |
| Agt 30 | NC_003062:438032 | T>C | IG |         |     |                              |        |
| Agt 5  | NC_003063:448065 | C>A | EX | CCC>ACC | P>T | succinate                    | nonsyn |
| Agt 30 | NC_003063:456551 | T>C | EX | CTG>CCG | L>P | ABC                          | nonsyn |
| Agt 26 | NC_003063:469175 | C>T | EX | GCG>GCA | A>A | monooxygenase                | syn    |
| Agt 53 | NC_003064:470214 | C>T | EX | GCG>ACG | A>T | chloromuconate               | nonsyn |
| Agt 38 | NC_003064:471392 | C>T | EX | GCC>ACC | A>T | acetylnornithine             | nonsyn |
| Agt 48 | NC_003064:472081 | T>C | EX | AAC>AGC | N>S | acetylnornithine             | nonsyn |
| Agt 59 | NC_003064:474764 | T>G | IG |         |     |                              |        |
| Agt 41 | NC_003062:478067 | T>A | IG |         |     |                              |        |
| Agt 17 | NC_003064:478655 | C>T | EX | CGC>TGC | R>C | hypothetical                 | nonsyn |
| Agt 17 | NC_003062:494085 | T>C | EX | CGT>CGC | R>R | enoyl-CoA                    | syn    |
| Agt 24 | NC_003062:495774 | G>C | EX | GAG>GAC | E>D | hypothetical                 | nonsyn |
| Agt 28 | NC_003063:512307 | C>T | EX | GGC>GGT | G>G | dehydrogenase                | syn    |
| Agt 33 | NC_003064:514069 | C>G | EX | GGT>GCT | G>A | hypothetical                 | nonsyn |
| Agt 13 | NC_003063:517433 | A>C | EX | CTT>CTG | L>L | phosphoglyceromutase         | syn    |
| Agt 43 | NC_003062:518364 | C>T | EX | ACG>ACA | T>T | two                          | syn    |
| Agt 13 | NC_003064:526869 | C>T | EX | ACG>ATG | T>M | ABC                          | nonsyn |
| Agt 14 | NC_003064:532724 | C>T | EX | GGA>AGA | G>R | mercuric                     | nonsyn |
| Agt 43 | NC_003062:541096 | A>T | EX | GTC>GAC | V>D | flagellar                    | nonsyn |
| Agt 2  | NC_003062:545362 | A>C | EX | ATG>AGG | M>R | hypothetical                 | nonsyn |
| Agt 34 | NC_003062:558515 | C>T | EX | CTG>TTG | L>L | transcriptional              | syn    |
| Agt 14 | NC_003063:563131 | G>T | EX | GGC>GGA | G>G | hypothetical                 | syn    |
| Agt 13 | NC_003063:572431 | C>A | EX | CTT>ATT | L>I | polysaccharide               | nonsyn |
| Agt 53 | NC_003062:579436 | C>G | EX | GGC>GGG | G>G | alpha-glucosidase            | syn    |
| Agt 40 | NC_003062:585964 | T>G | EX | AAG>ACG | K>T | glucose-6-phosphate          | nonsyn |
| Agt 57 | NC_003063:588700 | G>A | IG |         |     |                              |        |
| Agt 33 | NC_003062:591613 | G>T | IG |         |     |                              |        |
| Agt 57 | NC_003062:602978 | G>C | EX | ACC>ACG | T>T | two                          | syn    |
| Agt 9  | NC_003062:623347 | C>G | EX | GCG>GCC | A>A | octaprenyl-diphosphate       | syn    |
| Agt 15 | NC_003062:633577 | C>A | EX | CTG>ATG | L>M | glycyl-tRNA                  | nonsyn |
| Agt 37 | NC_003063:652176 | G>T | EX | GGT>GTT | G>V | 3-hydroxybutyryl-CoA         | nonsyn |
| Agt 58 | NC_003062:652258 | T>G | EX | GAA>GAC | E>D | phosphate                    | nonsyn |
| Agt 38 | NC_003063:653177 | C>G | EX | TCA>TGA | S>* | argininosuccinate            | nonsyn |
| Agt 38 | NC_003063:653178 | A>C | EX | TCA>TCC | S>S | argininosuccinate            | syn    |
| Agt 5  | NC_003062:660105 | T>G | IG |         |     |                              |        |
| Agt 46 | NC_003063:661017 | C>A | EX | GAT>TAT | D>Y | hypothetical                 | nonsyn |
| Agt 29 | NC_003062:661699 | T>C | IG |         |     |                              |        |
| Agt 41 | NC_003063:675986 | C>A | EX | CCG>CCT | P>P | cobyrinic                    | syn    |
| Agt 9  | NC_003063:676200 | G>A | EX | GCG>GTG | A>V | cobyrinic                    | nonsyn |
| Agt 43 | NC_003062:684364 | T>C | EX | GAT>GAC | D>D | hypothetical                 | syn    |
| Agt 51 | NC_003063:698722 | A>C | EX | CAA>CAC | Q>H | hypothetical                 | nonsyn |
| Agt 6  | NC_003062:699323 | A>C | EX | CAG>CCG | Q>P | two                          | nonsyn |
| Agt 9  | NC_003062:714219 | A>G | EX | CAC>CGC | H>R | hypothetical                 | nonsyn |
| Agt 11 | NC_003062:740198 | C>T | EX | GCG>GTG | A>V | transcriptional              | nonsyn |
| Agt 29 | NC_003062:754609 | T>C | EX | GAC>GGC | D>G | enoyl-(acyl-carrier-protein) | nonsyn |
| Agt 38 | NC_003062:758571 | C>T | IG |         |     |                              |        |
| Agt 10 | NC_003062:758811 | G>C | EX | GCC>CCC | A>P | hypothetical                 | nonsyn |
| Agt 22 | NC_003062:767514 | G>T | EX | TGC>TTC | C>F | cytochrome                   | nonsyn |
| Agt 44 | NC_003063:775685 | C>G | EX | CTG>CTC | L>L | hypothetical                 | syn    |
| Agt 10 | NC_003063:779726 | A>G | IG |         |     |                              |        |
| Agt 34 | NC_003063:788218 | A>G | IG |         |     |                              |        |
| Agt 29 | NC_003063:791250 | G>A | EX | GCA>GTA | A>V | metalloprotease              | nonsyn |
| Agt 24 | NC_003062:792433 | A>G | EX | ACT>ACC | T>T | putative                     | syn    |
| Agt 4  | NC_003062:820596 | T>C | EX | GTC>GCC | V>A | ABC                          | nonsyn |

|        |                   |     |    |         |     |                           |        |
|--------|-------------------|-----|----|---------|-----|---------------------------|--------|
| Agt 55 | NC_003063:822696  | G>C | EX | GAA>CAA | E>Q | fructose                  | nonsyn |
| Agt 58 | NC_003062:842511  | G>C | IG |         |     |                           |        |
| Agt 20 | NC_003062:843560  | A>G | EX | TGG>CGG | W>R | P                         | nonsyn |
| Agt 32 | NC_003063:846339  | G>A | EX | CGC>CGT | R>R | sigma                     | syn    |
| Agt 27 | NC_003062:850675  | A>T | EX | GGT>GGA | G>G | ABC                       | syn    |
| Agt 39 | NC_003063:860579  | C>T | EX | CAG>TAG | Q>* | hypothetical              | nonsyn |
| Agt 30 | NC_003063:873550  | A>G | EX | GAC>GGC | D>G | threonine                 | nonsyn |
| Agt 5  | NC_003062:881511  | C>T | IG |         |     |                           |        |
| Agt 53 | NC_003063:884801  | G>C | EX | TTC>TTG | F>L | L-asparagine              | nonsyn |
| Agt 20 | NC_003062:892265  | A>G | EX | ACC>GCC | T>A | 6-O-methylguanine-DNA     | nonsyn |
| Agt 39 | NC_003062:902547  | C>A | EX | ACC>AAC | T>N | Na+/H+                    | nonsyn |
| Agt 9  | NC_003062:906024  | A>G | IG |         |     |                           |        |
| Agt 6  | NC_003062:912073  | G>C | EX | GCC>GCG | A>A | hypothetical              | syn    |
| Agt 2  | NC_003062:918237  | G>C | EX | CAG>GAG | Q>E | amide                     | nonsyn |
| Agt 17 | NC_003062:927723  | C>A | EX | ACG>AAG | T>K | copper                    | nonsyn |
| Agt 28 | NC_003062:928847  | G>C | IG |         |     |                           |        |
| Agt 27 | NC_003063:932057  | G>C | EX | CCT>CGT | P>R | hypothetical              | nonsyn |
| Agt 13 | NC_003062:937948  | C>G | EX | GCC>GGC | A>G | hypothetical              | nonsyn |
| Agt 42 | NC_003062:940069  | T>A | IG |         |     |                           |        |
| Agt 4  | NC_003062:940210  | C>T | EX | GAC>GAT | D>D | hypothetical              | syn    |
| Agt 32 | NC_003063:959774  | C>A | EX | ATC>ATA | I>I | hypothetical              | syn    |
| Agt 42 | NC_003062:961875  | G>A | EX | GGC>GAC | G>D | cycH                      | nonsyn |
| Agt 19 | NC_003062:970181  | C>G | IG |         |     |                           |        |
| Agt 2  | NC_003063:976973  | G>A | EX | CCC>CTC | P>L | sugar                     | nonsyn |
| Agt 51 | NC_003063:977775  | A>G | IG |         |     |                           |        |
| Agt 42 | NC_003062:1009637 | C>T | EX | TCA>TTA | S>L | aldolase                  | nonsyn |
| Agt 4  | NC_003062:1012593 | A>G | EX | GAC>GGC | D>G | outer                     | nonsyn |
| Agt 27 | NC_003063:1023951 | T>A | EX | GAG>GTG | E>V | replication               | nonsyn |
| Agt 10 | NC_003063:1026702 | C>G | IG |         |     |                           |        |
| Agt 55 | NC_003063:1031977 | A>G | EX | ACT>ACC | T>T | hypothetical              | syn    |
| Agt 51 | NC_003063:1034098 | C>T | EX | GGC>GAC | G>D | urocanate                 | nonsyn |
| Agt 44 | NC_003062:1034285 | A>G | EX | GTA>GCA | V>A | hypothetical              | nonsyn |
| Agt 2  | NC_003063:1040330 | C>T | EX | TCC>TTC | S>F | N-formimino-L-glutamate   | nonsyn |
| Agt 14 | NC_003063:1041515 | T>C | IG |         |     |                           |        |
| Agt 45 | NC_003062:1044622 | G>A | EX | CAG>TAG | Q>* | hypothetical              | nonsyn |
| Agt 30 | NC_003062:1055422 | C>A | EX | CGC>CTC | R>L | ABC                       | nonsyn |
| Agt 32 | NC_003062:1074308 | G>A | EX | GCC>ACC | A>T | hypothetical              | nonsyn |
| Agt 5  | NC_003063:1088232 | C>T | IG |         |     |                           |        |
| Agt 32 | NC_003062:1100114 | C>T | EX | GCC>GCT | A>A | cytosol                   | syn    |
| Agt 19 | NC_003062:1120345 | G>T | IG |         |     |                           |        |
| Agt 13 | NC_003062:1120451 | A>G | IG |         |     |                           |        |
| Agt 6  | NC_003063:1131558 | C>T | EX | ACG>ACA | T>T | two                       | syn    |
| Agt 48 | NC_003063:1140805 | T>A | EX | CTG>CAG | L>Q | ferrichrome               | nonsyn |
| Agt 4  | NC_003063:1153224 | C>T | EX | GGT>AGT | G>S | glucose                   | nonsyn |
| Agt 37 | NC_003062:1175996 | A>G | IG |         |     |                           |        |
| Agt 38 | NC_003062:1183589 | G>C | EX | GGT>GCT | G>A | hypothetical              | nonsyn |
| Agt 21 | NC_003062:1193274 | C>T | EX | TTC>TTT | F>F | ABC                       | syn    |
| Agt 34 | NC_003063:1201024 | G>C | EX | CGC>GGC | R>G | glutamine                 | nonsyn |
| Agt 38 | NC_003063:1204722 | C>G | EX | GCC>CCC | A>P | 2-hydroxy-3-oxopropionate | nonsyn |
| Agt 39 | NC_003062:1218555 | G>C | IG |         |     |                           |        |
| Agt 36 | NC_003063:1222225 | C>T | EX | CCG>CTG | P>L | cytidylate                | nonsyn |
| Agt 44 | NC_003062:1224524 | A>G | EX | GTG>GCG | V>A | polysaccharide            | nonsyn |
| Agt 40 | NC_003063:1232628 | A>G | EX | AAC>AGC | N>S | dipeptide                 | nonsyn |
| Agt 2  | NC_003063:1232815 | C>G | EX | TAC>TAG | Y>* | dipeptide                 | nonsyn |
| Agt 30 | NC_003062:1246470 | G>T | EX | GCG>TCG | A>S | ATP-dependent             | nonsyn |
| Agt 58 | NC_003062:1250220 | A>C | EX | GAT>GCT | D>A | ATP-dependent             | nonsyn |
| Agt 28 | NC_003062:1260599 | C>G | EX | CTG>GTG | L>V | NADH                      | nonsyn |
| Agt 28 | NC_003062:1266985 | G>A | EX | GAA>AAA | E>K | NADH                      | nonsyn |
| Agt 26 | NC_003062:1267561 | C>A | EX | TTC>TTA | F>L | NADH                      | nonsyn |

|        |                   |     |    |         |     |                                  |        |
|--------|-------------------|-----|----|---------|-----|----------------------------------|--------|
| Agt 33 | NC_003062:1267639 | C>T | EX | AGC>AGT | S>S | NADH                             | syn    |
| Agt 7  | NC_003062:1271601 | C>G | EX | ATC>ATG | I>M | NADH                             | nonsyn |
| Agt 10 | NC_003062:1288825 | C>A | IG |         |     |                                  |        |
| Agt 22 | NC_003063:1294976 | G>A | EX | GAA>AAA | E>K | phosphoenolpyruvate-protein      | nonsyn |
| Agt 6  | NC_003063:1295987 | C>T | EX | TCC>TTC | S>F | peptide                          | nonsyn |
| Agt 15 | NC_003062:1303451 | C>T | EX | GCC>GTC | A>V | acyl-CoA                         | nonsyn |
| Agt 9  | NC_003063:1304022 | C>A | EX | CTG>CTT | L>L | hypothetical                     | syn    |
| Agt 10 | NC_003063:1305815 | T>C | IG |         |     |                                  |        |
| Agt 15 | NC_003063:1311363 | T>G | EX | CAA>CCA | Q>P | dihydropicolinate                | nonsyn |
| Agt 10 | NC_003063:1314997 | C>T | EX | CTG>TTG | L>L | oligopeptide                     | syn    |
| Agt 2  | NC_003062:1322817 | C>G | EX | CGG>GGG | R>G | hypothetical                     | nonsyn |
| Agt 29 | NC_003063:1324649 | G>A | EX | CGC>TGC | R>C | methyltransferase                | nonsyn |
| Agt 40 | NC_003062:1329450 | A>G | EX | GAA>GAG | E>E | penicillin-binding               | syn    |
| Agt 7  | NC_003063:1339888 | T>G | IG |         |     |                                  |        |
| Agt 32 | NC_003062:1345667 | A>G | IG |         |     |                                  |        |
| Agt 39 | NC_003062:1349152 | G>C | IG |         |     |                                  |        |
| Agt 36 | NC_003063:1352899 | A>T | EX | GAA>GTA | E>V | amidophosphoribosyltransferase   | nonsyn |
| Agt 2  | NC_003063:1362161 | A>G | IG |         |     |                                  |        |
| Agt 27 | NC_003062:1373663 | C>G | EX | GCC>GCG | A>A | zinc                             | syn    |
| Agt 7  | NC_003062:1374946 | A>G | EX | ATC>GTC | I>V | group                            | nonsyn |
| Agt 58 | NC_003062:1375128 | C>A | EX | GCC>GCA | A>A | group                            | syn    |
| Agt 58 | NC_003062:1375434 | C>G | EX | AGC>AGG | S>R | group                            | nonsyn |
| Agt 38 | NC_003062:1376269 | C>G | EX | CGC>GGC | R>G | group                            | nonsyn |
| Agt 57 | NC_003062:1382988 | A>C | IG |         |     |                                  |        |
| Agt 36 | NC_003062:1411771 | C>T | EX | GCG>GCA | A>A | long-chain-fatty-acid-CoA-ligase | syn    |
| Agt 54 | NC_003062:1416168 | C>T | EX | CAG>TAG | Q>* | transcriptional                  | nonsyn |
| Agt 57 | NC_003062:1423725 | A>G | IG |         |     |                                  |        |
| Agt 47 | NC_003062:1426455 | G>A | IG |         |     |                                  |        |
| Agt 51 | NC_003062:1426480 | G>A | IG |         |     |                                  |        |
| Agt 25 | NC_003062:1438309 | T>A | EX | CAT>CAA | H>Q | two                              | nonsyn |
| Agt 25 | NC_003062:1438310 | C>T | EX | CTT>TTT | L>F | two                              | nonsyn |
| Agt 6  | NC_003062:1439200 | C>T | EX | GAC>GAT | D>D | two                              | syn    |
| Agt 14 | NC_003062:1443034 | G>A | EX | GGG>GGA | G>G | two                              | syn    |
| Agt 46 | NC_003062:1446204 | G>C | EX | CTG>CTC | L>L | putative                         | syn    |
| Agt 54 | NC_003063:1459767 | C>T | EX | GCT>ACT | A>T | serine/threonine                 | nonsyn |
| Agt 13 | NC_003062:1465326 | G>C | EX | GGT>GCT | G>A | Camphor                          | nonsyn |
| Agt 29 | NC_003063:1467791 | T>C | EX | GAA>GGA | E>G | forkhead-type                    | nonsyn |
| Agt 10 | NC_003063:1480640 | C>T | EX | TCA>TTA | S>L | hypothetical                     | nonsyn |
| Agt 53 | NC_003062:1488422 | C>A | EX | CCG>CCT | P>P | thymidilate                      | syn    |
| Agt 15 | NC_003062:1490675 | A>C | EX | GTT>GTG | V>V | rare                             | syn    |
| Agt 2  | NC_003062:1491913 | G>A | IG |         |     |                                  |        |
| Agt 43 | NC_003062:1496248 | T>C | EX | ACC>GCC | T>A | DNA                              | nonsyn |
| Agt 15 | NC_003063:1505626 | C>T | IG |         |     |                                  |        |
| Agt 25 | NC_003063:1509227 | C>G | EX | CTG>GTG | L>V | sugar                            | nonsyn |
| Agt 28 | NC_003063:1509365 | C>G | EX | GGC>GGG | G>G | ribose                           | syn    |
| Agt 40 | NC_003063:1529182 | C>T | EX | GCG>GTG | A>V | denitrification                  | nonsyn |
| Agt 57 | NC_003062:1537053 | G>A | EX | GCG>GTG | A>V | magnesium                        | nonsyn |
| Agt 26 | NC_003062:1540418 | G>A | EX | CGC>CAC | R>H | formate                          | nonsyn |
| Agt 17 | NC_003062:1543348 | C>A | IG |         |     |                                  |        |
| Agt 33 | NC_003062:1543350 | C>A | IG |         |     |                                  |        |
| Agt 30 | NC_003063:1543889 | A>T | EX | ACC>TCC | T>S | nitrate                          | nonsyn |
| Agt 37 | NC_003063:1555080 | G>T | EX | GCG>TCG | A>S | bacteriocin                      | nonsyn |
| Agt 59 | NC_003062:1555269 | C>T | EX | GCG>ACG | A>T | transcriptional                  | nonsyn |
| Agt 44 | NC_003063:1555761 | G>C | EX | GTC>CTC | V>L | bacteriocin                      | nonsyn |
| Agt 59 | NC_003063:1557276 | C>G | EX | GAA>CAA | E>Q | hypothetical                     | nonsyn |
| Agt 33 | NC_003063:1570366 | C>A | IG |         |     |                                  |        |
| Agt 40 | NC_003062:1576477 | A>G | EX | TTC>TCC | F>S | lipid                            | nonsyn |
| Agt 28 | NC_003062:1576623 | C>A | EX | AAG>AAT | K>N | lipid                            | nonsyn |
| Agt 55 | NC_003062:1580343 | G>A | EX | AAC>AAT | N>N | 3-oxoacyl-(acyl-carrier-protein) | syn    |

|        |                   |     |    |         |     |                           |        |
|--------|-------------------|-----|----|---------|-----|---------------------------|--------|
| Agt 6  | NC_003062:1585605 | T>A | EX | CTT>CTA | L>L | poly-beta-hydroxybutyrate | syn    |
| Agt 14 | NC_003063:1588294 | G>C | EX | GGC>CGC | G>R | hippurate                 | nonsyn |
| Agt 10 | NC_003063:1592428 | C>A | EX | AAC>AAA | N>K | sorbitol                  | nonsyn |
| Agt 57 | NC_003062:1604819 | C>A | IG |         |     |                           |        |
| Agt 32 | NC_003062:1607432 | G>A | EX | GAA>AAA | E>K | DNA                       | nonsyn |
| Agt 42 | NC_003063:1613547 | A>G | IG |         |     |                           |        |
| Agt 51 | NC_003063:1624568 | C>T | EX | ATC>ATT | I>I | MFS                       | syn    |
| Agt 25 | NC_003063:1625784 | A>G | IG |         |     |                           |        |
| Agt 16 | NC_003062:1628852 | T>G | EX | GAG>GCG | E>A | ABC                       | nonsyn |
| Agt 9  | NC_003062:1639773 | C>T | EX | GCG>ACG | A>T | nitroreductase            | nonsyn |
| Agt 46 | NC_003063:1641991 | A>G | IG |         |     |                           |        |
| Agt 43 | NC_003062:1648053 | C>A | EX | ATC>ATA | I>I | soluble                   | syn    |
| Agt 4  | NC_003062:1652748 | G>A | IG |         |     |                           |        |
| Agt 36 | NC_003063:1652772 | C>T | EX | TTC>TTT | F>F | hypothetical              | syn    |
| Agt 24 | NC_003063:1653511 | T>C | EX | TTC>TCC | F>S | dehydrogenase             | nonsyn |
| Agt 7  | NC_003062:1657276 | G>C | EX | GCG>CCG | A>P | hypothetical              | nonsyn |
| Agt 21 | NC_003063:1659543 | G>A | EX | CGC>CGT | R>R | myo-inositol              | syn    |
| Agt 32 | NC_003063:1667916 | C>T | EX | GAG>GAA | E>E | AraC                      | syn    |
| Agt 14 | NC_003062:1673649 | G>C | EX | GCC>CCC | A>P | molybdenum                | nonsyn |
| Agt 29 | NC_003062:1674138 | G>T | EX | GAT>TAT | D>Y | molybdopterin             | nonsyn |
| Agt 29 | NC_003063:1680599 | C>A | EX | GAG>TAG | E>* | amino                     | nonsyn |
| Agt 26 | NC_003063:1689054 | C>G | EX | CGC>CGG | R>R | LysR                      | syn    |
| Agt 27 | NC_003062:1694602 | G>T | EX | CGC>AGC | R>S | hypothetical              | nonsyn |
| Agt 34 | NC_003063:1707810 | C>T | EX | TCG>TCA | S>S | hypothetical              | syn    |
| Agt 42 | NC_003062:1711026 | C>A | IG |         |     |                           |        |
| Agt 55 | NC_003063:1711334 | C>T | IG |         |     |                           |        |
| Agt 13 | NC_003062:1711797 | C>T | IG |         |     |                           |        |
| Agt 22 | NC_003062:1722946 | G>T | EX | GCC>GCA | A>A | manganese                 | syn    |
| Agt 42 | NC_003063:1723918 | C>A | IG |         |     |                           |        |
| Agt 33 | NC_003063:1725329 | A>G | IG |         |     |                           |        |
| Agt 17 | NC_003062:1725860 | G>A | IG |         |     |                           |        |
| Agt 33 | NC_003062:1738886 | G>A | EX | CTC>TTC | L>F | hypothetical              | nonsyn |
| Agt 2  | NC_003062:1750169 | A>G | IG |         |     |                           |        |
| Agt 6  | NC_003062:1750595 | C>G | EX | CGC>GGC | R>G | hypothetical              | nonsyn |
| Agt 6  | NC_003062:1753540 | C>T | IG |         |     |                           |        |
| Agt 53 | NC_003063:1758474 | G>C | EX | GCC>GCG | A>A | transposase               | syn    |
| Agt 28 | NC_003062:1762701 | G>C | EX | GCC>GCG | A>A | transcription-repair      | syn    |
| Agt 43 | NC_003062:1766369 | G>C | IG |         |     |                           |        |
| Agt 40 | NC_003063:1771819 | T>G | IG |         |     |                           |        |
| Agt 29 | NC_003063:1773593 | C>T | EX | GCA>GTA | A>V | mannonate                 | nonsyn |
| Agt 47 | NC_003062:1776367 | C>A | EX | ATG>ATT | M>I | lipoprotein               | nonsyn |
| Agt 32 | NC_003062:1785869 | C>T | EX | GCT>ACT | A>T | hypothetical              | nonsyn |
| Agt 40 | NC_003062:1792868 | A>C | EX | CAA>CAC | Q>H | hypothetical              | nonsyn |
| Agt 32 | NC_003062:1797103 | C>T | EX | CTT>TTT | L>F | hypothetical              | nonsyn |
| Agt 17 | NC_003063:1808391 | C>A | EX | GAA>TAA | E>* | sugar                     | nonsyn |
| Agt 39 | NC_003062:1818469 | T>C | IG |         |     |                           |        |
| Agt 20 | NC_003062:1822170 | G>A | EX | ACG>ACA | T>T | hypothetical              | syn    |
| Agt 41 | NC_003062:1826965 | G>T | EX | CGC>CTC | R>L | hypothetical              | nonsyn |
| Agt 5  | NC_003063:1828472 | C>G | EX | ACG>AGG | T>R | ABC                       | nonsyn |
| Agt 9  | NC_003063:1831441 | C>T | IG |         |     |                           |        |
| Agt 32 | NC_003063:1833023 | A>C | EX | ACT>CCT | T>P | cell                      | nonsyn |
| Agt 33 | NC_003063:1834432 | C>T | IG |         |     |                           |        |
| Agt 29 | NC_003062:1836785 | A>T | EX | CTC>CAC | L>H | inositol                  | nonsyn |
| Agt 16 | NC_003062:1837357 | G>C | EX | TCC>TCG | S>S | inositol                  | syn    |
| Agt 48 | NC_003063:1848598 | C>A | EX | CTC>CTA | L>L | amino                     | syn    |
| Agt 10 | NC_003063:1851314 | A>C | EX | TAT>TCT | Y>S | diguanylate               | nonsyn |
| Agt 24 | NC_003062:1884026 | T>A | EX | ATC>TTC | I>F | ABC                       | nonsyn |
| Agt 6  | NC_003062:1897405 | C>T | IG |         |     |                           |        |
| Agt 39 | NC_003062:1900502 | C>T | EX | GCC>GTC | A>V | hypothetical              | nonsyn |

|        |                   |     |    |         |     |                                         |        |
|--------|-------------------|-----|----|---------|-----|-----------------------------------------|--------|
| Agt 51 | NC_003062:1902061 | C>T | EX | ACG>ACA | T>T | DNA-directed                            | syn    |
| Agt 42 | NC_003062:1903363 | T>C | IG |         |     |                                         |        |
| Agt 14 | NC_003063:1905218 | T>G | IG |         |     |                                         |        |
| Agt 28 | NC_003062:1910068 | G>A | EX | GGC>GGT | G>G | 50S                                     | syn    |
| Agt 10 | NC_003062:1911466 | C>G | EX | GAG>CAG | E>Q | 30S                                     | nonsyn |
| Agt 29 | NC_003062:1915392 | G>A | IG |         |     |                                         |        |
| Agt 42 | NC_003063:1920950 | C>G | EX | CCC>GCC | P>A | hypothetical                            | nonsyn |
| Agt 30 | NC_003062:1924559 | T>C | EX | ACC>GCC | T>A | DNA-directed                            | nonsyn |
| Agt 47 | NC_003062:1933329 | C>A | EX | GAC>TAC | D>Y | 50S                                     | nonsyn |
| Agt 22 | NC_003062:1933880 | G>A | EX | CCG>TCG | P>S | 50S                                     | nonsyn |
| Agt 47 | NC_003063:1934849 | C>T | EX | GCC>GTC | A>V | hypothetical                            | nonsyn |
| Agt 10 | NC_003062:1935030 | C>G | IG |         |     |                                         |        |
| Agt 13 | NC_003062:1935797 | T>C | EX | GAT>GGT | D>G | UDP-glucose                             | nonsyn |
| Agt 44 | NC_003063:1936259 | C>G | EX | CGG>CCG | R>P | hypothetical                            | nonsyn |
| Agt 10 | NC_003062:1941946 | G>A | EX | CTG>TTG | L>L | cyclopropane-fatty-acyl-phospholipid    | syn    |
| Agt 32 | NC_003063:1976371 | A>T | EX | CCT>CCA | P>P | hypothetical                            | syn    |
| Agt 38 | NC_003062:1988944 | G>A | EX | GAC>GAT | D>D | hypothetical                            | syn    |
| Agt 42 | NC_003062:1990792 | G>C | EX | CTG>CTC | L>L | hypothetical                            | syn    |
| Agt 58 | NC_003063:1991393 | C>T | EX | CCT>TCT | P>S | UDP-phosphate                           | nonsyn |
| Agt 13 | NC_003063:1993247 | G>T | EX | GCG>TCG | A>S | hypothetical                            | nonsyn |
| Agt 21 | NC_003062:1994765 | G>A | EX | CGC>TGC | R>C | acetolactate                            | nonsyn |
| Agt 4  | NC_003063:2004467 | A>T | EX | ATC>AAC | I>N | IclR                                    | nonsyn |
| Agt 7  | NC_003062:2021475 | G>C | EX | ATG>ATC | M>I | DNA                                     | nonsyn |
| Agt 11 | NC_003062:2023284 | G>A | IG |         |     |                                         |        |
| Agt 29 | NC_003063:2033942 | G>T | EX | ATC>ATA | I>I | hypothetical                            | syn    |
| Agt 11 | NC_003063:2034898 | G>T | EX | CTC>CTA | L>L | hypothetical                            | syn    |
| Agt 41 | NC_003062:2046583 | G>C | EX | GCC>GGC | A>G | UDP-3-0-(3-hydroxymyristoyl)            | nonsyn |
| Agt 26 | NC_003063:2046593 | C>T | IG |         |     |                                         |        |
| Agt 57 | NC_003062:2047509 | T>C | EX | GCA>GCG | A>A | cell                                    | syn    |
| Agt 11 | NC_003062:2049241 | G>T | EX | CGC>AGC | R>S | cell                                    | nonsyn |
| Agt 11 | NC_003062:2049246 | C>T | EX | GGC>GAC | G>D | cell                                    | nonsyn |
| Agt 36 | NC_003063:2052723 | A>C | EX | CTC>CGC | L>R | oxidoreductase                          | nonsyn |
| Agt 28 | NC_003063:2054152 | A>G | EX | CTG>CCG | L>P | NADP-dependent                          | nonsyn |
| Agt 43 | NC_003062:2060951 | G>A | EX | TCC>TCT | S>S | UDP-N-acetylmuramoyl-L-alanyl-D-glutama | syn    |
| Agt 36 | NC_003062:2080737 | C>A | EX | CTG>ATG | L>M | hypothetical                            | nonsyn |
| Agt 5  | NC_003062:2087307 | G>A | IG |         |     |                                         |        |
| Agt 38 | NC_003062:2096409 | G>A | EX | AGC>AGT | S>S | hypothetical                            | syn    |
| Agt 15 | NC_003062:2098874 | C>A | EX | CGC>CGA | R>R | hypothetical                            | syn    |
| Agt 7  | NC_003062:2102147 | T>G | EX | AAA>CAA | K>Q | chromosome                              | nonsyn |
| Agt 48 | NC_003062:2109543 | C>A | IG |         |     |                                         |        |
| Agt 5  | NC_003062:2110339 | C>T | IG |         |     |                                         |        |
| Agt 42 | NC_003062:2134060 | T>A | EX | GAG>GTG | E>V | hypothetical                            | nonsyn |
| Agt 51 | NC_003062:2157870 | A>G | EX | GAT>GAC | D>D | hypothetical                            | syn    |
| Agt 42 | NC_003062:2158585 | A>C | IG |         |     |                                         |        |
| Agt 44 | NC_003062:2163412 | T>C | IG |         |     |                                         |        |
| Agt 40 | NC_003062:2163600 | G>C | IG |         |     |                                         |        |
| Agt 33 | NC_003062:2176939 | A>G | EX | ACG>GCG | T>A | two                                     | nonsyn |
| Agt 39 | NC_003062:2202170 | G>A | EX | GTG>GTA | V>V | ABC                                     | syn    |
| Agt 43 | NC_003062:2216799 | C>G | EX | CGG>CCG | R>P | hypothetical                            | nonsyn |
| Agt 42 | NC_003062:2221661 | G>A | EX | TCA>TTA | S>L | poly(A)                                 | nonsyn |
| Agt 34 | NC_003062:2225834 | C>T | EX | CCG>TCG | P>S | hypothetical                            | nonsyn |
| Agt 6  | NC_003062:2233382 | G>A | EX | CCC>TCC | P>S | acetyltransferase                       | nonsyn |
| Agt 10 | NC_003062:2274061 | C>A | IG |         |     |                                         |        |
| Agt 13 | NC_003062:2276897 | C>T | EX | GCC>ACC | A>T | hypothetical                            | nonsyn |
| Agt 30 | NC_003062:2278523 | G>A | EX | GAA>AAA | E>K | hypothetical                            | nonsyn |
| Agt 26 | NC_003062:2339410 | A>C | EX | GTC>GGC | V>G | ABC                                     | nonsyn |
| Agt 59 | NC_003062:2343265 | G>T | EX | GAT>TAT | D>Y | Hypothetical                            | nonsyn |
| Agt 2  | NC_003062:2405531 | G>A | EX | CTG>CTA | L>L | two                                     | syn    |
| Agt 17 | NC_003062:2416269 | T>C | IG |         |     |                                         |        |

|        |                    |     |    |         |     |                 |            |
|--------|--------------------|-----|----|---------|-----|-----------------|------------|
| Agt 19 | NC_003062:2420743  | G>A | EX | TCG>TCA | S>S | hypothetical    | syn        |
| Agt 37 | NC_003062:2422428  | G>A | IG |         |     |                 |            |
| Agt 15 | NC_003062:2446288  | T>C | IG |         |     |                 |            |
| Agt 20 | NC_003062:2449521  | G>A | EX | GGC>AGC | G>S | HlyD            | nonsyn     |
| Agt 42 | NC_003062:2465510  | C>G | EX | GTC>GTG | V>V | NAD(P)+         | syn        |
| Agt 55 | NC_003062:2488439  | G>A | EX | TGG>TAG | W>* | dipeptidase     | nonsyn     |
| Agt 37 | NC_003062:2512099  | C>T | EX | CTT>TTT | L>F | N-methylproline | nonsyn     |
| Agt 58 | NC_003062:2534359  | G>A | EX | GAA>AAA | E>K | ABC             | nonsyn     |
| Agt 36 | NC_003062:2540528  | C>T | EX | TGG>TGA | W>* | thiamine        | nonsyn     |
| Agt 28 | NC_003062:2580720  | T>G | EX | ATG>CTG | M>L | ABC             | nonsyn     |
| Agt 4  | NC_003062:2606662  | C>T | EX | GAG>AAG | E>K | ATP             | nonsyn     |
| Agt 16 | NC_003062:2608924  | G>A | EX | CGC>TGC | R>C | ATP             | nonsyn     |
| Agt 24 | NC_003062:2643419  | C>T | EX | CGA>TGA | R>* | hypothetical    | nonsyn     |
| Agt 21 | NC_003062:2666987  | C>T | IG |         |     |                 |            |
| Agt 43 | NC_003062:2696055  | T>C | EX | GAA>GGA | E>G | hypothetical    | nonsyn     |
| Agt 44 | NC_003062:2701803  | C>T | EX | CCG>CCA | P>P | ABC             | syn        |
| Agt 17 | NC_003062:2734240  | C>T | EX | GCA>ACA | A>T | oxidoreductase  | nonsyn     |
| Agt 47 | NC_003062:2737023  | T>C | EX | ATA>ACA | I>T | oxidoreductase  | nonsyn     |
| Agt 41 | NC_003062:2739373  | C>T | EX | ATC>ATT | I>I | hypothetical    | syn        |
| Agt 9  | NC_003062:2766294  | G>C | IG |         |     |                 |            |
| Agt 51 | NC_003062:2794483  | G>C | EX | GGC>GGG | G>G | hypothetical    | syn        |
| Agt 24 | NC_003062:2802078  | C>T | EX | GCT>ACT | A>T | precorrin-3B    | nonsyn     |
| Agt 16 | NC_003062:2802228  | T>C | EX | TGA>TGG | *>W | precorrin-2     | nonsyn     |
| Agt 10 | NC_003062:2820870  | C>T | EX | CAG>CAA | Q>Q | ABC             | syn        |
| Agt 10 | NC_003062:2823898  | G>A | IG |         |     |                 |            |
| Agt 59 | NC_003062:2825078  | G>A | EX | GGC>AGC | G>S | D-galactarate   | nonsyn     |
| Agt 25 | NC_003062:2837494  | C>G | EX | CGG>CCG | R>P | tRNA            | nonsyn     |
| Bs 65  | NZ_CM000488:1807   | T>C | IG |         |     |                 |            |
| Bs 65  | NZ_CM000488:1810   | G>A | IG |         |     |                 |            |
| Bs 57  | NZ_CM000488:2854   | T>C | EX | TCG>CCG | S>P | DNA             | nonsyn     |
| Bs 3   | NZ_CM000488:3701   | A>C | EX | AAA>CAA | K>Q | recombination   | nonsyn seq |
| Bs 54  | NZ_CM000488:4731   | G>A | IG |         |     |                 | seq        |
| Bs 69  | plasmid:18786      | G>A | IG |         |     |                 |            |
| Bs 52  | plasmid:37642      | T>A | IG |         |     |                 |            |
| Bs 68  | NZ_CM000488:52841  | C>T | EX | GGC>GGT | G>G | hypothetical    | syn        |
| Bs 24  | NZ_CM000488:67598  | A>G | EX | GAA>GGA | E>G | hypothetical    | nonsyn     |
| Bs 32  | plasmid:71964      | G>T | IG |         |     |                 |            |
| Bs 40  | NZ_CM000488:75323  | A>G | EX | ACA>GCA | T>A | hypothetical    | nonsyn     |
| Bs 71  | NZ_CM000488:75492  | G>A | EX | AGC>AAC | S>N | hypothetical    | nonsyn     |
| Bs 2   | plasmid:77327      | A>C | IG |         |     |                 |            |
| Bs 69  | NZ_CM000488:109377 | T>C | EX | GTT>GCT | V>A | hypothetical    | nonsyn     |
| Bs 8   | NZ_CM000488:120051 | G>C | IG |         |     |                 |            |
| Bs 55  | NZ_CM000488:120607 | C>T | EX | GCT>GTT | A>V | 50S             | nonsyn seq |
| Bs 30  | NZ_CM000488:143224 | C>T | EX | GCT>GTT | A>V | 50S             | nonsyn     |
| Bs 8   | NZ_CM000488:254839 | T>C | IG |         |     |                 |            |
| Bs 17  | NZ_CM000488:295122 | T>G | EX | TAT>TCT | Y>S | hypothetical    | nonsyn seq |
| Bs 40  | NZ_CM000488:315244 | C>T | EX | CAG>TAG | Q>* | hypothetical    | nonsyn seq |
| Bs 24  | NZ_CM000488:319694 | C>T | EX | CGG>CGA | R>R | hypothetical    | syn        |
| Bs 48  | NZ_CM000488:340482 | C>T | EX | GCG>ACG | A>T | hypothetical    | nonsyn     |
| Bs 63  | NZ_CM000488:435548 | C>T | IG |         |     |                 |            |
| Bs 45  | NZ_CM000488:442405 | C>T | EX | GCG>GTG | A>V | 4-aminobutyrate | nonsyn     |
| Bs 43  | NZ_CM000488:479685 | A>G | EX | ATC>GTC | I>V | hypothetical    | nonsyn     |
| Bs 11  | NZ_CM000488:486200 | C>T | EX | CAA>TAA | Q>* | hypothetical    | nonsyn     |
| Bs 48  | NZ_CM000488:498298 | C>A | EX | AAC>AAA | N>K | two-component   | nonsyn     |
| Bs 45  | NZ_CM000488:563093 | T>C | IG |         |     |                 |            |
| Bs 45  | NZ_CM000488:572257 | A>G | EX | ATA>GTA | I>V | hypothetical    | nonsyn     |
| Bs 45  | NZ_CM000488:582286 | T>C | EX | TAC>TGC | Y>C | hypothetical    | nonsyn     |
| Bs 31  | NZ_CM000488:600726 | A>G | EX | ATT>GTT | I>V | hypothetical    | nonsyn     |
| Bs 41  | NZ_CM000488:604739 | C>A | EX | GGG>TGG | G>W | ATP-binding     | nonsyn     |





|       |                     |     |    |         |     |                                   |        |     |
|-------|---------------------|-----|----|---------|-----|-----------------------------------|--------|-----|
| Bs 1  | NZ_CM000488:1327052 | T>A | EX | TTT>TAT | F>Y | hypothetical                      | nonsyn | seq |
| Bs 26 | NZ_CM000488:1328269 | A>G | EX | GGA>GGG | G>G | hypothetical                      | syn    |     |
| Bs 15 | NZ_CM000488:1334273 | G>A | IG |         |     |                                   |        |     |
| Bs 28 | NZ_CM000488:1351919 | C>T | EX | GCC>ACC | A>T | hypothetical                      | nonsyn |     |
| Bs 14 | NZ_CM000488:1365167 | G>T | IG |         |     |                                   |        |     |
| Bs 32 | NZ_CM000488:1386408 | G>T | IG |         |     |                                   |        |     |
| Bs 17 | NZ_CM000488:1394780 | A>C | EX | TAA>TCA | *>S | hypothetical                      | nonsyn |     |
| Bs 68 | NZ_CM000488:1395164 | G>A | EX | TCG>TCA | S>S | hypothetical                      | syn    |     |
| Bs 38 | NZ_CM000488:1409406 | C>T | EX | GCC>GTC | A>V | hypothetical                      | nonsyn | seq |
| Bs 53 | NZ_CM000488:1409851 | A>G | IG |         |     |                                   |        |     |
| Bs 22 | NZ_CM000488:1410578 | C>T | EX | GTC>GTT | V>V | hypothetical                      | syn    |     |
| Bs 7  | NZ_CM000488:1418709 | T>C | EX | TCT>CCT | S>P | two-component                     | nonsyn |     |
| Bs 63 | NZ_CM000488:1461920 | G>A | EX | GAA>AAA | E>K | spore                             | nonsyn |     |
| Bs 2  | NZ_CM000488:1499082 | A>G | IG |         |     |                                   |        | seq |
| Bs 45 | NZ_CM000488:1502040 | T>A | EX | TAT>AAT | Y>N | hypothetical                      | nonsyn | seq |
| Bs 68 | NZ_CM000488:1509006 | A>T | EX | GAA>GTA | E>V | phosphotransferase                | nonsyn |     |
| Bs 35 | NZ_CM000488:1511575 | A>G | IG |         |     |                                   |        |     |
| Bs 24 | NZ_CM000488:1538980 | T>C | IG |         |     |                                   |        |     |
| Bs 46 | NZ_CM000488:1574667 | C>T | EX | GCG>GTG | A>V | hypothetical                      | nonsyn |     |
| Bs 54 | NZ_CM000488:1576391 | G>A | EX | GAC>GAT | D>D | hypothetical                      | syn    |     |
| Bs 52 | NZ_CM000488:1599437 | C>A | EX | GGC>GGA | G>G | bacillopeptidase                  | syn    |     |
| Bs 27 | NZ_CM000488:1619202 | G>C | EX | GTG>GTC | V>V | uracil                            | syn    |     |
| Bs 51 | NZ_CM000488:1630251 | G>C | EX | GGC>GCC | G>A | phosphoadenosine                  | nonsyn |     |
| Bs 51 | NZ_CM000488:1630255 | T>A | EX | TGT>TGA | C>* | phosphoadenosine                  | nonsyn |     |
| Bs 51 | NZ_CM000488:1630266 | C>A | EX | ACT>AAT | T>N | phosphoadenosine                  | nonsyn |     |
| Bs 51 | NZ_CM000488:1630267 | T>A | EX | ACT>ACA | T>T | phosphoadenosine                  | syn    |     |
| Bs 7  | NZ_CM000488:1645316 | C>T | EX | CAT>TAT | H>Y | primosome                         | nonsyn |     |
| Bs 15 | NZ_CM000488:1646988 | A>G | EX | AAC>AGC | N>S | methionyl-tRNA                    | nonsyn | seq |
| Bs 43 | NZ_CM000488:1670591 | A>G | EX | GTT>GCT | V>A | hypothetical                      | nonsyn |     |
| Bs 27 | NZ_CM000488:1681434 | G>A | EX | GGA>AGA | G>R | succinyl-CoA                      | nonsyn |     |
| Bs 15 | NZ_CM000488:1682464 | A>C | EX | CAA>CCA | Q>P | DNA                               | nonsyn |     |
| Bs 1  | NZ_CM000488:1692793 | A>T | EX | AGC>TGC | S>C | flagellar                         | nonsyn | seq |
| Bs 54 | NZ_CM000488:1713940 | C>T | EX | ACT>ATT | T>I | two-component                     | nonsyn |     |
| Bs 69 | NZ_CM000488:1717754 | A>G | EX | GTA>GTG | V>V | 30S                               | syn    |     |
| Bs 19 | NZ_CM000488:1728130 | A>G | EX | AAA>GAA | K>E | DNA                               | nonsyn |     |
| Bs 17 | NZ_CM000488:1752456 | A>G | EX | ACA>GCA | T>A | DNA                               | nonsyn |     |
| Bs 40 | NZ_CM000488:1759170 | G>T | EX | GGG>GGT | G>G | 3-ketoacyl-(acyl-carrier-protein) | syn    |     |
| Bs 46 | NZ_CM000488:1763811 | T>G | IG |         |     |                                   |        | seq |
| Bs 40 | NZ_CM000488:1774095 | T>C | IG |         |     |                                   |        |     |
| Bs 60 | NZ_CM000488:1781664 | T>C | EX | GTG>GCG | V>A | transcriptional                   | nonsyn | seq |
| Bs 48 | NZ_CM000488:1784118 | C>T | IG |         |     |                                   |        |     |
| Bs 49 | NZ_CM000488:1788828 | C>T | EX | CAT>TAT | H>Y | polyketide                        | nonsyn |     |
| Bs 54 | NZ_CM000488:1796764 | A>G | EX | ACA>GCA | T>A | polyketide                        | nonsyn |     |
| Bs 41 | NZ_CM000488:1804735 | C>T | EX | CAA>TAA | Q>* | polyketide                        | nonsyn |     |
| Bs 49 | NZ_CM000488:1816086 | T>G | EX | GTC>GGC | V>G | polyketide                        | nonsyn |     |
| Bs 17 | NZ_CM000488:1833150 | T>C | EX | GTT>GCT | V>A | polyketide                        | nonsyn |     |
| Bs 20 | NZ_CM000488:1856383 | A>G | EX | CCA>CCG | P>P | polyketide                        | syn    |     |
| Bs 36 | NZ_CM000488:1864188 | C>T | EX | GCT>ACT | A>T | multidrug                         | nonsyn |     |
| Bs 48 | NZ_CM000488:1864847 | C>T | EX | GGG>AGG | G>R | hypothetical                      | nonsyn |     |
| Bs 13 | NZ_CM000488:1875641 | A>G | IG |         |     |                                   |        |     |
| Bs 3  | NZ_CM000488:1887763 | A>T | EX | TTA>TTT | L>F | H <sup>+</sup> -symporter         | nonsyn | seq |
| Bs 3  | NZ_CM000488:1900124 | C>T | IG |         |     |                                   |        | seq |
| Bs 31 | NZ_CM000488:1901359 | C>T | IG |         |     |                                   |        |     |
| Bs 1  | NZ_CM000488:1904003 | C>A | IG |         |     |                                   |        | seq |
| Bs 54 | NZ_CM000488:1915494 | A>G | EX | TCT>CCT | S>P | hypothetical                      | nonsyn |     |
| Bs 24 | NZ_CM000488:1915729 | A>G | IG |         |     |                                   |        | seq |
| Bs 37 | NZ_CM000488:1919396 | G>C | EX | GGA>GCA | G>A | transketolase                     | nonsyn |     |
| Bs 1  | NZ_CM000488:1925714 | T>A | IG |         |     |                                   |        | seq |
| Bs 49 | NZ_CM000488:1930701 | G>A | IG |         |     |                                   |        |     |

|       |                     |     |    |         |     |                        |        |     |
|-------|---------------------|-----|----|---------|-----|------------------------|--------|-----|
| Bs 37 | NZ_CM000488:1934289 | G>A | EX | GGG>AGG | G>R | DNA                    | nonsyn | seq |
| Bs 2  | NZ_CM000488:1936697 | T>G | EX | GAT>GAG | D>E | DNA                    | nonsyn | seq |
| Bs 55 | NZ_CM000488:1945157 | C>G | IG |         |     |                        |        |     |
| Bs 45 | NZ_CM000488:1947170 | T>C | EX | TTC>TCC | F>S | hypothetical           | nonsyn |     |
| Bs 30 | NZ_CM000488:1954548 | G>C | EX | CCC>CCG | P>P | acyl-CoA               | syn    |     |
| Bs 55 | NZ_CM000488:1955568 | C>A | EX | GCA>TCA | A>S | hypothetical           | nonsyn | seq |
| Bs 8  | NZ_CM000488:1964164 | C>T | EX | CCG>CCA | P>P | plipastatin            | syn    |     |
| Bs 74 | NZ_CM000488:1977750 | G>A | EX | CTT>TTT | L>F | plipastatin            | nonsyn |     |
| Bs 57 | NZ_CM000488:1983591 | A>G | EX | ATA>ACA | I>T | plipastatin            | nonsyn |     |
| Bs 63 | NZ_CM000488:1992969 | A>G | EX | ATC>ACC | I>T | plipastatin            | nonsyn |     |
| Bs 2  | NZ_CM000488:1997445 | T>C | IG |         |     |                        |        | seq |
| Bs 32 | NZ_CM000488:1998593 | C>T | EX | GAT>AAT | D>N | penicillin-binding     | nonsyn |     |
| Bs 49 | NZ_CM000488:2003425 | T>C | IG |         |     |                        |        |     |
| Bs 54 | NZ_CM000488:2009251 | T>C | EX | CAG>CGG | Q>R | glutamate              | nonsyn |     |
| Bs 4  | NZ_CM000488:2015305 | C>T | EX | GCT>ACT | A>T | gamma-glutamyl         | nonsyn | seq |
| Bs 46 | NZ_CM000488:2035993 | C>T | IG |         |     |                        |        |     |
| Bs 55 | NZ_CM000488:2036065 | C>T | IG |         |     |                        |        | seq |
| Bs 69 | NZ_CM000488:2050660 | G>A | EX | GTC>GTT | V>V | phosphoenolpyruvate    | syn    | seq |
| Bs 32 | NZ_CM000488:2054393 | A>C | EX | TTA>TGA | L>* | endo-1,4-beta-xylanase | nonsyn | seq |
| Bs 57 | NZ_CM000488:2054488 | A>G | IG |         |     |                        |        |     |
| Bs 14 | NZ_CM000488:2058851 | T>C | IG |         |     |                        |        |     |
| Bs 65 | NZ_CM000488:2081564 | A>T | EX | TAT>AAT | Y>N | hypothetical           | nonsyn |     |
| Bs 54 | NZ_CM000488:2098288 | A>T | EX | ATC>TTC | I>F | hypothetical           | nonsyn |     |
| Bs 22 | NZ_CM000488:2103353 | G>A | EX | GCT>ACT | A>T | superoxide             | nonsyn |     |
| Bs 55 | NZ_CM000488:2104440 | G>A | EX | CGA>TGA | R>* | hypothetical           | nonsyn |     |
| Bs 57 | NZ_CM000488:2133034 | T>G | EX | GCT>GCG | A>A | hypothetical           | syn    |     |
| Bs 57 | NZ_CM000488:2134117 | G>A | EX | GCT>GTT | A>V | hypothetical           | nonsyn |     |
| Bs 14 | NZ_CM000488:2141260 | A>G | EX | TGG>CGG | W>R | acetylnornithine       | nonsyn |     |
| Bs 15 | NZ_CM000488:2143032 | T>C | EX | GCA>GCG | A>A | hypothetical           | syn    |     |
| Bs 14 | NZ_CM000488:2151223 | A>G | IG |         |     |                        |        | seq |
| Bs 40 | NZ_CM000488:2174720 | A>G | IG |         |     |                        |        |     |
| Bs 22 | NZ_CM000488:2210135 | G>A | EX | ACC>ATC | T>I | hypothetical           | nonsyn |     |
| Bs 38 | NZ_CM000488:2224366 | T>A | IG |         |     |                        |        |     |
| Bs 2  | NZ_CM000488:2224432 | C>T | IG |         |     |                        |        | seq |
| Bs 37 | NZ_CM000488:2243177 | C>T | EX | GCC>GTC | A>V | hypothetical           | nonsyn |     |
| Bs 65 | NZ_CM000488:2246794 | C>T | IG |         |     |                        |        |     |
| Bs 24 | NZ_CM000488:2250659 | C>T | EX | AGC>AGT | S>S | hypothetical           | syn    | seq |
| Bs 45 | NZ_CM000488:2252368 | A>G | EX | CAG>CGG | Q>R | hypothetical           | nonsyn |     |
| Bs 54 | NZ_CM000488:2256497 | G>A | EX | TGG>TAG | W>* | hypothetical           | nonsyn |     |
| Bs 65 | NZ_CM000488:2276623 | T>C | IG |         |     |                        |        |     |
| Bs 65 | NZ_CM000488:2303696 | T>C | EX | GAA>GGA | E>G | hypothetical           | nonsyn |     |
| Bs 31 | NZ_CM000488:2316172 | G>A | EX | CCG>CTG | P>L | naringenin-chalcone    | nonsyn |     |
| Bs 6  | NZ_CM000488:2364666 | A>G | EX | TTA>TCA | L>S | hypothetical           | nonsyn | seq |
| Bs 45 | NZ_CM000488:2383352 | T>C | EX | ATG>GTG | M>V | heptaprenyl            | nonsyn |     |
| Bs 11 | NZ_CM000488:2396273 | C>T | EX | GAA>AAA | E>K | hypothetical           | nonsyn |     |
| Bs 26 | NZ_CM000488:2403866 | A>G | EX | TGG>CGG | W>R | hypothetical           | nonsyn |     |
| Bs 55 | NZ_CM000488:2409337 | G>A | EX | CCG>TCG | P>S | hypothetical           | nonsyn | seq |
| Bs 49 | NZ_CM000488:2415148 | C>T | EX | CGG>CAG | R>Q | two-component          | nonsyn |     |
| Bs 20 | NZ_CM000488:2422476 | G>A | EX | GCC>GTC | A>V | spore                  | nonsyn |     |
| Bs 1  | NZ_CM000488:2422749 | G>A | EX | CCG>TCG | P>S | D-alanyl-D-alanine     | nonsyn | seq |
| Bs 17 | NZ_CM000488:2441354 | A>G | EX | TGG>CGG | W>R | sporulation            | nonsyn |     |
| Bs 11 | NZ_CM000488:2451304 | G>A | EX | CCG>CTG | P>L | malolactic             | nonsyn |     |
| Bs 71 | NZ_CM000488:2455294 | T>C | EX | TAC>TGC | Y>C | L-asparaginase         | nonsyn |     |
| Bs 48 | NZ_CM000488:2477618 | T>C | EX | AAG>GAG | K>E | ribonuclease           | nonsyn |     |
| Bs 71 | NZ_CM000488:2480215 | G>A | EX | GCG>GTG | A>V | 6-phosphogluconate     | nonsyn |     |
| Bs 15 | NZ_CM000488:2486374 | A>G | EX | TTA>TCA | L>S | hypothetical           | nonsyn |     |
| Bs 38 | NZ_CM000488:2488616 | A>C | EX | ATG>AGG | M>R | hypothetical           | nonsyn |     |
| Bs 3  | NZ_CM000488:2491962 | C>T | IG |         |     |                        |        |     |
| Bs 13 | NZ_CM000488:2493177 | G>A | EX | GGA>GAA | G>E | multidrug              | nonsyn |     |

|       |                     |     |    |         |     |                         |            |
|-------|---------------------|-----|----|---------|-----|-------------------------|------------|
| Bs 38 | NZ_CM000488:2493385 | T>A | EX | ATT>ATA | I>I | multidrug               | syn        |
| Bs 17 | NZ_CM000488:2505101 | G>T | EX | CCG>ACG | P>T | transcriptional         | nonsyn     |
| Bs 31 | NZ_CM000488:2514114 | T>C | IG |         |     |                         |            |
| Bs 4  | NZ_CM000488:2521363 | A>C | EX | CTT>CGT | L>R | DNA                     | nonsyn seq |
| Bs 44 | NZ_CM000488:2536274 | G>A | EX | GCC>GCT | A>A | mutants                 | syn        |
| Bs 37 | NZ_CM000488:2547916 | C>T | EX | TGG>TGA | W>* | glycine                 | nonsyn     |
| Bs 65 | NZ_CM000488:2552669 | A>T | EX | CTT>CAT | L>H | translocation-dependent | nonsyn     |
| Bs 26 | NZ_CM000488:2553444 | T>G | EX | ATT>CTT | I>L | type                    | nonsyn seq |
| Bs 22 | NZ_CM000488:2554482 | T>C | IG |         |     |                         |            |
| Bs 32 | NZ_CM000488:2568229 | T>C | EX | ACC>GCC | T>A | hypothetical            | nonsyn seq |
| Bs 14 | NZ_CM000488:2592655 | C>T | EX | CTG>CTA | L>L | endonuclease            | syn        |
| Bs 49 | NZ_CM000488:2602147 | T>C | EX | ATA>ATG | I>M | DNA                     | nonsyn     |
| Bs 45 | NZ_CM000488:2604517 | A>T | EX | GTG>GAG | V>E | hypothetical            | nonsyn     |
| Bs 27 | NZ_CM000488:2611365 | A>G | EX | GTT>GTC | V>V | putative                | syn        |
| Bs 69 | NZ_CM000488:2627094 | T>C | EX | GCA>GCG | A>A | class                   | syn        |
| Bs 8  | NZ_CM000488:2632687 | A>C | EX | AGT>AGG | S>R | required                | nonsyn     |
| Bs 60 | NZ_CM000488:2633074 | G>A | EX | CAC>CAT | H>H | required                | syn        |
| Bs 11 | NZ_CM000488:2634837 | T>C | IG |         |     |                         |            |
| Bs 63 | NZ_CM000488:2660640 | T>G | EX | TCC>GCC | S>A | hypothetical            | nonsyn     |
| Bs 7  | NZ_CM000488:2672636 | G>A | EX | AGC>AGT | S>S | hypothetical            | syn        |
| Bs 49 | NZ_CM000488:2687116 | A>C | EX | AAT>AAG | N>K | hypothetical            | nonsyn seq |
| Bs 45 | NZ_CM000488:2690431 | T>C | EX | AAA>GAA | K>E | hypothetical            | nonsyn     |
| Bs 48 | NZ_CM000488:2715058 | A>C | EX | CTG>CGG | L>R | hypothetical            | nonsyn     |
| Bs 20 | NZ_CM000488:2725031 | G>A | IG |         |     |                         |            |
| Bs 35 | NZ_CM000488:2738566 | A>G | IG |         |     |                         |            |
| Bs 7  | NZ_CM000488:2741608 | A>C | EX | TTA>GTA | L>V | RNA                     | nonsyn     |
| Bs 32 | NZ_CM000488:2746214 | T>C | EX | GTG>GCG | V>A | hypothetical            | nonsyn     |
| Bs 26 | NZ_CM000488:2762817 | T>G | EX | ACC>CCC | T>P | NifA/NtrC               | nonsyn     |
| Bs 22 | NZ_CM000488:2773493 | G>A | EX | GCA>GTA | A>V | hypothetical            | nonsyn seq |
| Bs 38 | NZ_CM000488:2786088 | T>C | EX | AAA>GAA | K>E | hypothetical            | nonsyn     |
| Bs 20 | NZ_CM000488:2798615 | T>C | EX | AAA>GAA | K>E | alanyl-tRNA             | nonsyn     |
| Bs 26 | NZ_CM000488:2839854 | C>A | EX | TTC>TTA | F>L | YrzF                    | nonsyn     |
| Bs 6  | NZ_CM000488:2848696 | T>C | IG |         |     |                         | seq        |
| Bs 54 | NZ_CM000488:2856726 | T>C | EX | CAG>CGG | Q>R | inhibition              | nonsyn     |
| Bs 49 | NZ_CM000488:2894422 | T>C | EX | GCA>GCG | A>A | acetolactate            | syn        |
| Bs 69 | NZ_CM000488:2913378 | T>C | EX | GAA>GGA | E>G | alpha-L-arabinosidase   | nonsyn     |
| Bs 7  | NZ_CM000488:2916561 | C>T | EX | GCG>GCA | A>A | enoyl-CoA               | syn        |
| Bs 7  | NZ_CM000488:2924745 | T>C | EX | CAC>CGC | H>R | hypothetical            | nonsyn     |
| Bs 52 | NZ_CM000488:2934603 | C>T | EX | CTC>CTT | L>L | hypothetical            | syn        |
| Bs 55 | NZ_CM000488:2942235 | G>A | EX | CCG>TCG | P>S | arabinose               | nonsyn     |
| Bs 30 | NZ_CM000488:2943679 | T>C | EX | GAA>GGA | E>G | arabinose               | nonsyn     |
| Bs 60 | NZ_CM000488:2959963 | T>C | EX | CAC>CGC | H>R | threonyl-tRNA           | nonsyn     |
| Bs 35 | NZ_CM000488:2963717 | T>C | EX | GAA>GGA | E>G | membrane                | nonsyn     |
| Bs 30 | NZ_CM000488:2975894 | G>A | EX | CCG>CTG | P>L | two-component           | nonsyn     |
| Bs 7  | NZ_CM000488:2976801 | G>A | EX | CGC>TGC | R>C | two-component           | nonsyn     |
| Bs 62 | NZ_CM000488:2982646 | T>C | EX | CTG>CCG | L>P | hypothetical            | nonsyn     |
| Bs 51 | NZ_CM000488:2987660 | A>G | EX | CTA>CCA | L>P | acetyl-CoA              | nonsyn     |
| Bs 45 | NZ_CM000488:2990888 | A>G | EX | TTT>TTC | F>F | DNA                     | syn        |
| Bs 57 | NZ_CM000488:3001983 | A>C | EX | GTT>GGT | V>G | hypothetical            | nonsyn     |
| Bs 17 | NZ_CM000488:3014116 | C>T | IG |         |     |                         |            |
| Bs 17 | NZ_CM000488:3014117 | A>T | IG |         |     |                         |            |
| Bs 40 | NZ_CM000488:3021499 | C>T | EX | AGC>AAC | S>N | hypothetical            | nonsyn     |
| Bs 52 | NZ_CM000488:3034470 | T>C | IG |         |     |                         |            |
| Bs 41 | NZ_CM000488:3046432 | T>C | EX | TTA>TTG | L>L | hypothetical            | syn        |
| Bs 60 | NZ_CM000488:3046936 | T>C | EX | CTA>CTG | L>L | hypothetical            | syn seq    |
| Bs 2  | NZ_CM000488:3049575 | C>T | IG |         |     |                         |            |
| Bs 1  | NZ_CM000488:3057130 | G>A | EX | AGC>AGT | S>S | malate                  | syn seq    |
| Bs 63 | NZ_CM000488:3058144 | G>T | EX | TGC>TGA | C>* | hypothetical            | nonsyn     |
| Bs 43 | NZ_CM000488:3062178 | G>A | EX | ATC>ATT | I>I | pullulanase             | syn        |

|       |                     |     |    |         |     |                           |  |  |        |     |
|-------|---------------------|-----|----|---------|-----|---------------------------|--|--|--------|-----|
| Bs 46 | NZ_CM000488:3071818 | T>G | IG |         |     |                           |  |  |        | seq |
| Bs 52 | NZ_CM000488:3082500 | A>T | EX | TAC>TTC | Y>F | hypothetical              |  |  | nonsyn |     |
| Bs 26 | NZ_CM000488:3085315 | G>A | EX | CCG>CTG | P>L | hypothetical              |  |  | nonsyn |     |
| Bs 2  | NZ_CM000488:3086881 | A>G | EX | TTT>TTC | F>F | hypothetical              |  |  | syn    | seq |
| Bs 48 | NZ_CM000488:3090224 | C>A | EX | GGC>TGC | G>C | biotin                    |  |  | nonsyn |     |
| Bs 62 | NZ_CM000488:3094539 | A>G | IG |         |     |                           |  |  |        |     |
| Bs 46 | NZ_CM000488:3130586 | C>T | EX | AAG>AAA | K>K | hypothetical              |  |  | syn    |     |
| Bs 2  | NZ_CM000488:3164354 | T>C | EX | AAA>GAA | K>E | glycogen                  |  |  | nonsyn | seq |
| Bs 28 | NZ_CM000488:3177536 | T>C | IG |         |     |                           |  |  |        |     |
| Bs 68 | NZ_CM000488:3205251 | G>A | EX | AGC>AGT | S>S | methyl-accepting          |  |  | syn    |     |
| Bs 57 | NZ_CM000488:3205342 | T>C | EX | CAC>CGC | H>R | methyl-accepting          |  |  | nonsyn |     |
| Bs 50 | NZ_CM000488:3207261 | T>C | IG |         |     |                           |  |  |        |     |
| Bs 43 | NZ_CM000488:3231026 | G>T | EX | CGG>AGG | R>R | sporulation               |  |  | syn    |     |
| Bs 35 | NZ_CM000488:3232518 | C>T | EX | CTC>TTC | L>F | hypothetical              |  |  | nonsyn | seq |
| Bs 55 | NZ_CM000488:3264862 | T>C | EX | GAC>GGC | D>G | short                     |  |  | nonsyn |     |
| Bs 11 | NZ_CM000488:3287821 | G>A | EX | CCC>TCC | P>S | 2,3-dihydroxybenzoate-AMP |  |  | nonsyn | seq |
| Bs 60 | NZ_CM000488:3317605 | G>A | EX | GCA>GTA | A>V | hypothetical              |  |  | nonsyn | seq |
| Bs 15 | NZ_CM000488:3318211 | G>A | EX | TTC>TTT | F>F | hypothetical              |  |  | syn    |     |
| Bs 74 | NZ_CM000488:3323458 | G>A | EX | CTC>CTT | L>L | hypothetical              |  |  | syn    |     |
| Bs 74 | NZ_CM000488:3329546 | C>T | EX | CTC>TTC | L>F | uric                      |  |  | nonsyn | seq |
| Bs 44 | NZ_CM000488:3346730 | A>G | EX | GTT>GCT | V>A | hypothetical              |  |  | nonsyn |     |
| Bs 53 | NZ_CM000488:3393986 | C>T | EX | GCG>GCA | A>A | hypothetical              |  |  | syn    |     |
| Bs 40 | NZ_CM000488:3394547 | G>A | EX | CGG>TGG | R>W | hypothetical              |  |  | nonsyn |     |
| Bs 44 | NZ_CM000488:3395222 | G>A | EX | AGC>AGT | S>S | hypothetical              |  |  | syn    |     |
| Bs 57 | NZ_CM000488:3408022 | C>G | EX | GCG>GCC | A>A | hypothetical              |  |  | syn    |     |
| Bs 57 | NZ_CM000488:3408460 | C>T | IG |         |     |                           |  |  |        |     |
| Bs 17 | NZ_CM000488:3442860 | C>A | IG |         |     |                           |  |  |        | seq |
| Bs 44 | NZ_CM000488:3471640 | G>A | EX | GCG>ACG | A>T | hypothetical              |  |  | nonsyn |     |
| Bs 74 | NZ_CM000488:3478975 | T>G | EX | CAA>CCA | Q>P | triosephosphate           |  |  | nonsyn |     |
| Bs 20 | NZ_CM000488:3509165 | C>T | EX | GCA>ACA | A>T | Yvfl                      |  |  | nonsyn |     |
| Bs 26 | NZ_CM000488:3515627 | T>C | EX | AAA>GAA | K>E | hypothetical              |  |  | nonsyn |     |
| Bs 62 | NZ_CM000488:3536896 | G>A | EX | GGG>GAG | G>E | hypothetical              |  |  | nonsyn |     |
| Bs 6  | NZ_CM000488:3557526 | T>C | EX | GAA>GAG | E>E | hypothetical              |  |  | syn    | seq |
| Bs 27 | NZ_CM000488:3563754 | A>G | EX | TAC>CAC | Y>H | hypothetical              |  |  | nonsyn |     |
| Bs 50 | NZ_CM000488:3633821 | T>C | IG |         |     |                           |  |  |        |     |
| Bs 40 | NZ_CM000488:3653031 | C>T | IG |         |     |                           |  |  |        |     |
| Bs 46 | NZ_CM000488:3666701 | T>C | EX | AGG>GGG | R>G | membrane-bound            |  |  | nonsyn | seq |
| Bs 62 | NZ_CM000488:3678489 | C>A | EX | GAG>GAT | E>D | UDP-glucose:polyglycerol  |  |  | nonsyn |     |
| Bs 27 | NZ_CM000488:3692310 | G>A | EX | GCG>GTG | A>V | hypothetical              |  |  | nonsyn |     |
| Bs 44 | NZ_CM000488:3698952 | G>A | EX | CTC>CTT | L>L | hypothetical              |  |  | syn    |     |
| Bs 30 | NZ_CM000488:3735752 | C>T | EX | AAC>AAT | N>N | hypothetical              |  |  | syn    |     |
| Bs 50 | NZ_CM000488:3744710 | G>T | EX | CAG>AAG | Q>K | flagellar                 |  |  | nonsyn |     |
| Bs 40 | NZ_CM000488:3754454 | C>T | EX | GGG>AGG | G>R | hypothetical              |  |  | nonsyn |     |
| Bs 52 | NZ_CM000488:3755722 | T>C | IG |         |     |                           |  |  |        | seq |
| Bs 19 | NZ_CM000488:3765396 | A>C | EX | GGT>GGG | G>G | hypothetical              |  |  | syn    |     |
| Bs 36 | NZ_CM000488:3798374 | C>T | EX | GCG>GCA | A>A | hypothetical              |  |  | syn    |     |
| Bs 48 | NZ_CM000488:3803924 | T>C | IG |         |     |                           |  |  |        | seq |
| Bs 4  | NZ_CM000488:3804463 | G>A | EX | GCT>GTT | A>V | fructose                  |  |  | nonsyn | seq |
| Bs 14 | NZ_CM000488:3809172 | T>G | EX | CTG>CGG | L>R | hypothetical              |  |  | nonsyn |     |
| Bs 1  | NZ_CM000488:3814530 | A>T | EX | TGG>AGG | W>R | hypothetical              |  |  | nonsyn | seq |
| Bs 57 | NZ_CM000488:3818544 | G>A | EX | TTC>TTT | F>F | hypothetical              |  |  | syn    |     |
| Bs 24 | NZ_CM000488:3821104 | G>A | EX | GGC>GGT | G>G | hypothetical              |  |  | syn    |     |
| Bs 22 | NZ_CM000488:3835012 | A>G | IG |         |     |                           |  |  |        |     |
| Bs 28 | NZ_CM000488:3855430 | A>T | IG |         |     |                           |  |  |        | seq |
| Bs 19 | NZ_CM000488:3856077 | A>T | EX | CTC>CAC | L>H | methylenomycin            |  |  | nonsyn |     |
| Bs 26 | NZ_CM000488:3861032 | A>C | EX | CTA>CTC | L>L | transcriptional           |  |  | syn    |     |
| Bs 31 | NZ_CM000488:3870542 | T>C | EX | ACA>GCA | T>A | hypothetical              |  |  | nonsyn |     |
| Bs 51 | NZ_CM000488:3873281 | C>A | IG |         |     |                           |  |  |        |     |
| Bs 3  | NZ_CM000488:3876855 | T>C | EX | GAA>GGA | E>G | involved                  |  |  | nonsyn | seq |

|       |                     |     |    |         |     |                                       |  |        |     |
|-------|---------------------|-----|----|---------|-----|---------------------------------------|--|--------|-----|
| Bs 69 | NZ_CM000488:3879709 | A>T | IG |         |     |                                       |  |        |     |
| Bs 24 | NZ_CM000488:3881779 | A>T | IG |         |     |                                       |  |        |     |
| Bs 8  | NZ_CM000488:3917914 | T>C | EX | TGG>CGG | W>R | hypothetical                          |  | nonsyn |     |
| Bs 17 | NZ_CM000488:3924882 | A>G | EX | GTT>GCT | V>A | hypothetical                          |  | nonsyn |     |
| Bs 45 | NZ_CM000488:3931707 | T>C | EX | ATA>GTA | I>V | hypothetical                          |  | nonsyn |     |
| Bs 65 | NZ_CM000488:3978656 | T>A | IG |         |     |                                       |  |        |     |
| Bs 14 | NZ_CM000488:4005558 | T>C | EX | GTA>GCA | V>A | hypothetical                          |  | nonsyn | seq |
| Bs 45 | NZ_CM000488:4025960 | T>C | EX | GAA>GGA | E>G | cell                                  |  | nonsyn |     |
| Bs 41 | NZ_CM000488:4053309 | G>A | IG |         |     |                                       |  |        |     |
| Bs 50 | NZ_CM000488:4059405 | A>G | EX | CAT>CAC | H>H | hypothetical                          |  | syn    |     |
| Bs 38 | NZ_CM000488:4061406 | G>A | EX | GGC>GGT | G>G | hypothetical                          |  | syn    |     |
| Bs 17 | NZ_CM000488:4074623 | A>T | EX | TAT>AAT | Y>N | inositol                              |  | nonsyn |     |
| Bs 7  | NZ_CM000488:4086475 | T>C | EX | GTA>GCA | V>A | hypothetical                          |  | nonsyn | seq |
| Bs 19 | NZ_CM000488:4117840 | G>A | IG |         |     |                                       |  |        |     |
| Bs 14 | NZ_CM000488:4130603 | T>C | EX | TAT>TGT | Y>C | hypothetical                          |  | nonsyn | seq |
| Bs 51 | NZ_CM000488:4132788 | T>C | EX | AAA>GAA | K>E | hypothetical                          |  | nonsyn |     |
| Bs 57 | NZ_CM000488:4138637 | G>A | IG |         |     |                                       |  |        |     |
| Bs 51 | NZ_CM000488:4151353 | T>C | EX | AAA>GAA | K>E | hypothetical                          |  | nonsyn |     |
| Bs 44 | NZ_CM000488:4155800 | T>C | IG |         |     |                                       |  |        | seq |
| Bs 45 | NZ_CM000488:4156086 | G>A | EX | CCG>CTG | P>L | hypothetical                          |  | nonsyn | seq |
| Bs 55 | NZ_CM000488:4158225 | G>T | IG |         |     |                                       |  |        |     |
| Bs 31 | NZ_CM000488:4173504 | T>C | EX | TCA>CCA | S>P | hypothetical                          |  | nonsyn |     |
| Bs 71 | NZ_CM000488:4175417 | A>T | EX | CAT>CTT | H>L | hypothetical                          |  | nonsyn |     |
| Bs 36 | NZ_CM000488:4180435 | G>T | IG |         |     |                                       |  |        |     |
| Bs 52 | NZ_CM000488:4193254 | A>G | IG |         |     |                                       |  |        |     |
| Bs 15 | NZ_CM000488:4200542 | C>T | EX | TGG>TGA | W>* | hypothetical                          |  | nonsyn |     |
| Ec 83 | NC_000913:1927      | C>T | EX | CCG>TCG | P>S | fused                                 |  | nonsyn |     |
| Ec 48 | NC_000913:13313     | G>A | EX | GGT>GAT | G>D | chaperone                             |  | nonsyn |     |
| Ec 75 | NC_000913:20158     | T>G | EX | AAA>CAA | K>Q | IS1                                   |  | nonsyn |     |
| Ec 11 | NC_000913:30799     | A>C | IG |         |     |                                       |  |        |     |
| Ec 55 | NC_000913:34237     | C>T | IG |         |     |                                       |  |        |     |
| Ec 50 | NC_000913:60747     | G>C | EX | CCG>GCG | P>A | RNA                                   |  | nonsyn |     |
| Ec 61 | NC_000913:60965     | A>G | EX | GTG>GCG | V>A | RNA                                   |  | nonsyn |     |
| Ec 35 | NC_000913:77036     | A>C | EX | GAT>GAG | D>E | transcriptional                       |  | nonsyn |     |
| Ec 17 | NC_000913:79763     | C>T | EX | GCG>ACG | A>T | 3-isopropylmalate                     |  | nonsyn |     |
| Ec 99 | NC_000913:80680     | T>G | EX | GAT>GCT | D>A | 3-isopropylmalate                     |  | nonsyn |     |
| Ec 84 | NC_000913:107482    | T>G | IG |         |     |                                       |  |        |     |
| Ec 8  | NC_000913:119211    | A>C | EX | GAT>GCT | D>A | 1,6-anhydro-N-acetylmuramyl-L-alanine |  | nonsyn |     |
| Ec 70 | NC_000913:120366    | G>T | EX | CGC>AGC | R>S | aromatic                              |  | nonsyn |     |
| Ec 68 | NC_000913:122177    | G>A | EX | CGC>CAC | R>H | DNA-binding                           |  | nonsyn |     |
| Ec 16 | NC_000913:136363    | A>G | EX | GAT>GAC | D>D | spermidine                            |  | syn    |     |
| Ec 12 | NC_000913:146593    | G>A | EX | GAC>GAT | D>D | aspartate                             |  | syn    |     |
| Ec 45 | NC_000913:160881    | C>G | EX | TTG>TTC | L>F | putative                              |  | nonsyn |     |
| Ec 44 | NC_000913:182689    | A>C | EX | CAG>CCG | Q>P | DNA-binding                           |  | nonsyn |     |
| Ec 28 | NC_000913:186442    | C>T | EX | GAC>AAC | D>N | uridylyltransferase                   |  | nonsyn |     |
| Ec 39 | NC_000913:220368    | C>T | EX | CTG>CTA | L>L | DL-methionine                         |  | syn    |     |
| Ec 11 | NC_000913:222754    | G>A | IG |         |     |                                       |  |        |     |
| Ec 39 | NC_000913:223463    | C>T | IG |         |     |                                       |  |        |     |
| Ec 87 | NC_000913:231608    | G>T | EX | GGC>TGC | G>C | hypothetical                          |  | nonsyn |     |
| Ec 28 | NC_000913:231655    | A>C | EX | ATA>ATC | I>I | hypothetical                          |  | syn    |     |
| Ec 71 | NC_000913:236978    | T>G | IG |         |     |                                       |  |        |     |
| Ec 39 | NC_000913:246540    | A>G | IG |         |     |                                       |  |        |     |
| Ec 65 | NC_000913:251974    | C>A | IG |         |     |                                       |  |        |     |
| Ec 50 | NC_000913:256366    | G>A | EX | CCG>CCA | P>P | guanine-hypoxanthine                  |  | syn    |     |
| Ec 79 | NC_000913:284486    | A>G | IG |         |     |                                       |  |        |     |
| Ec 16 | NC_000913:286648    | C>T | EX | GTC>GTT | V>V | CP4-6                                 |  | syn    |     |
| Ec 94 | NC_000913:286742    | C>T | EX | CAG>TAG | Q>* | CP4-6                                 |  | nonsyn |     |
| Ec 8  | NC_000913:340069    | T>G | EX | ATT>ATG | I>M | carbamate                             |  | nonsyn |     |
| Ec 50 | NC_000913:344490    | T>G | IG |         |     |                                       |  |        |     |

|       |                   |     |    |         |     |                                          |  |        |
|-------|-------------------|-----|----|---------|-----|------------------------------------------|--|--------|
| Ec 28 | NC_000913:353886  | T>C | IG |         |     |                                          |  |        |
| Ec 28 | NC_000913:353893  | T>G | IG |         |     |                                          |  |        |
| Ec 21 | NC_000913:377367  | C>T | EX | GTT>ATT | V>I | S-formylglutathione                      |  | nonsyn |
| Ec 62 | NC_000913:386645  | T>G | EX | TTA>GTA | L>V | taurine                                  |  | nonsyn |
| Ec 70 | NC_000913:389285  | A>G | IG |         |     |                                          |  |        |
| Ec 38 | NC_000913:396478  | G>C | EX | GGC>CGC | G>R | microcin                                 |  | nonsyn |
| Ec 35 | NC_000913:471102  | C>T | EX | CAG>TAG | Q>* | fused                                    |  | nonsyn |
| Ec 11 | NC_000913:498995  | T>A | EX | AAA>ATA | K>I | acetyl                                   |  | nonsyn |
| Ec 6  | NC_000913:526865  | A>G | EX | ACA>GCA | T>A | hypothetical                             |  | nonsyn |
| Ec 90 | NC_000913:536137  | C>T | EX | CTG>TTG | L>L | tartronate                               |  | syn    |
| Ec 38 | NC_000913:537546  | G>A | EX | CTG>CTA | L>L | putative                                 |  | syn    |
| Ec 29 | NC_000913:540043  | C>T | EX | ATC>ATT | I>I | putative                                 |  | syn    |
| Ec 13 | NC_000913:543079  | G>A | EX | GTC>GTT | V>V | hypothetical                             |  | syn    |
| Ec 65 | NC_000913:557219  | C>T | IG |         |     |                                          |  |        |
| Ec 49 | NC_000913:617563  | A>G | EX | TTA>TTG | L>L | regulator                                |  | syn    |
| Ec 44 | NC_000913:646804  | G>T | EX | GCA>GAA | A>E | apo-citrate                              |  | nonsyn |
| Ec 94 | NC_000913:651482  | C>T | EX | CAG>TAG | Q>* | sensory                                  |  | nonsyn |
| Ec 41 | NC_000913:665947  | C>T | EX | CAG>CAA | Q>Q | transpeptidase                           |  | syn    |
| Ec 25 | NC_000913:682663  | C>T | IG |         |     |                                          |  |        |
| Ec 74 | NC_000913:691456  | C>T | EX | GAA>AAA | E>K | metal-binding                            |  | nonsyn |
| Ec 53 | NC_000913:700115  | A>C | EX | TTT>GTT | F>V | DNA-binding                              |  | nonsyn |
| Ec 61 | NC_000913:730434  | T>C | EX | ACT>ACC | T>T | rhsC                                     |  | syn    |
| Ec 65 | NC_000913:731563  | G>A | EX | GCC>ACC | A>T | rhsC                                     |  | nonsyn |
| Ec 39 | NC_000913:736113  | A>G | IG |         |     |                                          |  |        |
| Ec 39 | NC_000913:736115  | A>T | IG |         |     |                                          |  |        |
| Ec 39 | NC_000913:736174  | A>G | IG |         |     |                                          |  |        |
| Ec 47 | NC_000913:753915  | A>C | IG |         |     |                                          |  |        |
| Ec 66 | NC_000913:774426  | T>G | EX | GTT>GTG | V>V | membrane                                 |  | syn    |
| Ec 50 | NC_000913:782795  | G>C | EX | CGC>CCC | R>P | nicotinamide                             |  | nonsyn |
| Ec 89 | NC_000913:785034  | C>T | EX | CCA>CTA | P>L | 3-deoxy-D-arabino-heptulosonate-7-phospl |  | nonsyn |
| Ec 68 | NC_000913:816164  | C>T | IG |         |     |                                          |  |        |
| Ec 81 | NC_000913:858330  | G>A | IG |         |     |                                          |  |        |
| Ec 48 | NC_000913:872465  | A>C | EX | AAA>AAC | K>N | putative                                 |  | nonsyn |
| Ec 82 | NC_000913:884568  | G>T | EX | CTT>ATT | L>I | FMN                                      |  | nonsyn |
| Ec 63 | NC_000913:890423  | A>G | EX | GAA>GGA | E>G | nitroreductase                           |  | nonsyn |
| Ec 7  | NC_000913:897304  | C>G | EX | GCC>GCG | A>A | inner                                    |  | syn    |
| Ec 63 | NC_000913:898959  | G>A | IG |         |     |                                          |  |        |
| Ec 41 | NC_000913:906575  | C>A | EX | GCT>TCT | A>S | conserved                                |  | nonsyn |
| Ec 59 | NC_000913:987136  | T>C | EX | AAC>AGC | N>S | asparaginylyl                            |  | nonsyn |
| Ec 28 | NC_000913:990526  | A>C | EX | ACC>CCC | T>P | aminopeptidase                           |  | nonsyn |
| Ec 55 | NC_000913:1019090 | C>G | EX | GGT>CGT | G>R | outer                                    |  | nonsyn |
| Ec 16 | NC_000913:1023067 | C>T | EX | GCC>ACC | A>T | inner                                    |  | nonsyn |
| Ec 46 | NC_000913:1043601 | T>C | EX | GAG>GGG | E>G | phosphotyrosine-protein                  |  | nonsyn |
| Ec 65 | NC_000913:1054504 | A>G | EX | TTT>CTT | F>L | hybrid                                   |  | nonsyn |
| Ec 85 | NC_000913:1067631 | G>T | IG |         |     |                                          |  |        |
| Ec 10 | NC_000913:1074021 | C>T | EX | GCG>GTG | A>V | DNA-binding                              |  | nonsyn |
| Ec 29 | NC_000913:1083417 | C>T | EX | CGC>CGT | R>R | deferrerochelatae,                       |  | syn    |
| Ec 74 | NC_000913:1102222 | C>T | EX | AAG>AAA | K>K | DNA-binding                              |  | syn    |
| Ec 44 | NC_000913:1103010 | T>C | IG |         |     |                                          |  |        |
| Ec 8  | NC_000913:1104543 | A>C | IG |         |     |                                          |  |        |
| Ec 41 | NC_000913:1127435 | C>G | EX | GCC>GGC | A>G | putative                                 |  | nonsyn |
| Ec 46 | NC_000913:1173231 | G>T | IG |         |     |                                          |  |        |
| Ec 49 | NC_000913:1186360 | A>G | EX | TAT>TAC | Y>Y | cupin                                    |  | syn    |
| Ec 74 | NC_000913:1189131 | C>T | EX | CCG>CCA | P>P | DNA-binding                              |  | syn    |
| Ec 75 | NC_000913:1201412 | T>C | IG |         |     |                                          |  |        |
| Ec 50 | NC_000913:1222442 | A>C | IG |         |     |                                          |  |        |
| Ec 21 | NC_000913:1242881 | A>T | EX | GAT>GTT | D>V | lytic                                    |  | nonsyn |
| Ec 49 | NC_000913:1301784 | T>G | EX | TTG>GTG | L>V | oligopeptide                             |  | nonsyn |
| Ec 49 | NC_000913:1311017 | T>C | EX | AAC>AGC | N>S | inner                                    |  | nonsyn |

|       |                   |     |    |         |     |                           |        |
|-------|-------------------|-----|----|---------|-----|---------------------------|--------|
| Ec 81 | NC_000913:1334655 | G>A | EX | CTG>CTA | L>L | aconitate                 | syn    |
| Ec 82 | NC_000913:1338450 | C>T | EX | CTG>TTG | L>L | DUF1049                   | syn    |
| Ec 74 | NC_000913:1374071 | C>T | EX | ACA>ATA | T>I | putative                  | nonsyn |
| Ec 45 | NC_000913:1384979 | A>T | EX | CAT>CTT | H>L | DNA-binding               | nonsyn |
| Ec 63 | NC_000913:1393393 | A>T | EX | ATC>AAC | I>N | mechanosensitive          | nonsyn |
| Ec 39 | NC_000913:1408092 | C>T | EX | ACC>ACT | T>T | ATP-dependent             | syn    |
| Ec 83 | NC_000913:1416308 | G>A | IG |         |     |                           |        |
| Ec 85 | NC_000913:1424333 | G>T | IG |         |     |                           |        |
| Ec 28 | NC_000913:1435682 | C>T | EX | GGC>AGC | G>S | fused                     | nonsyn |
| Ec 39 | NC_000913:1522323 | T>A | EX | AGT>AGA | S>R | ATP-binding               | nonsyn |
| Ec 83 | NC_000913:1535872 | A>T | EX | TGG>AGG | W>R | nitrate                   | nonsyn |
| Ec 80 | NC_000913:1542879 | C>A | IG |         |     |                           |        |
| Ec 35 | NC_000913:1547775 | C>T | EX | GCG>GTG | A>V | formate                   | nonsyn |
| Ec 56 | NC_000913:1558664 | A>G | EX | TTC>TCC | F>S | D-ala-D-ala               | nonsyn |
| Ec 7  | NC_000913:1605686 | T>A | EX | CTG>CAG | L>Q | trans-aconitate           | nonsyn |
| Ec 53 | NC_000913:1609699 | C>G | EX | GCG>GCC | A>A | putative                  | syn    |
| Ec 45 | NC_000913:1612205 | C>A | EX | GTG>TTG | V>L | succinate                 | nonsyn |
| Ec 59 | NC_000913:1642727 | G>A | EX | GCA>GTA | A>V | Qin                       | nonsyn |
| Ec 41 | NC_000913:1665800 | G>A | EX | GGC>GGT | G>G | global                    | syn    |
| Ec 12 | NC_000913:1666404 | T>C | EX | GAG>GGG | E>G | global                    | nonsyn |
| Ec 66 | NC_000913:1681615 | G>A | EX | AGC>AAC | S>N | sensory                   | nonsyn |
| Ec 63 | NC_000913:1695209 | T>C | IG |         |     |                           |        |
| Ec 23 | NC_000913:1702041 | T>C | EX | ACC>GCC | T>A | putative                  | nonsyn |
| Ec 59 | NC_000913:1702790 | T>G | IG |         |     |                           |        |
| Ec 63 | NC_000913:1718872 | G>A | IG |         |     |                           |        |
| Ec 63 | NC_000913:1772674 | G>A | EX | GCC>ACC | A>T | quinate/shikimate         | nonsyn |
| Ec 92 | NC_000913:1773491 | A>G | IG |         |     |                           |        |
| Ec 29 | NC_000913:1775436 | G>C | EX | GCG>CCG | A>P | putative                  | nonsyn |
| Ec 29 | NC_000913:1788431 | G>T | EX | CGT>AGT | R>S | conserved                 | nonsyn |
| Ec 6  | NC_000913:1791978 | G>A | EX | GCC>GCT | A>A | glutathione               | syn    |
| Ec 84 | NC_000913:1801027 | C>A | IG |         |     |                           |        |
| Ec 78 | NC_000913:1825900 | G>A | EX | ACC>ACT | T>T | succinylarginine          | syn    |
| Ec 92 | NC_000913:1839765 | G>C | EX | TGG>TGC | W>C | CTP                       | nonsyn |
| Ec 41 | NC_000913:1842577 | C>A | EX | GAG>TAG | E>* | inner                     | nonsyn |
| Ec 99 | NC_000913:1855545 | A>G | EX | GGT>GGC | G>G | putative                  | syn    |
| Ec 61 | NC_000913:1856410 | G>A | EX | CTG>TTG | L>L | putative                  | syn    |
| Ec 28 | NC_000913:1882064 | A>C | EX | AAG>CAG | K>Q | putative                  | nonsyn |
| Ec 6  | NC_000913:1900116 | G>A | EX | GAG>GAA | E>E | fused                     | syn    |
| Ec 10 | NC_000913:1920961 | A>C | EX | ATT>ATG | I>M | serine/threonine-specific | nonsyn |
| Ec 38 | NC_000913:1942219 | G>C | EX | AGC>ACC | S>T | zinc                      | nonsyn |
| Ec 77 | NC_000913:1948118 | T>C | EX | AAA>AAG | K>K | aspartyl-tRNA             | syn    |
| Ec 99 | NC_000913:1974613 | A>C | EX | GTC>GGC | V>G | proton                    | nonsyn |
| Ec 11 | NC_000913:1984131 | G>A | EX | CTG>TTG | L>L | L-arabinose               | syn    |
| Ec 46 | NC_000913:1990116 | T>G | IG |         |     |                           |        |
| Ec 82 | NC_000913:2009458 | C>G | IG |         |     |                           |        |
| Ec 50 | NC_000913:2057939 | T>C | IG |         |     |                           |        |
| Ec 12 | NC_000913:2069933 | A>C | EX | AAC>ACC | N>T | CP4-44                    | nonsyn |
| Ec 35 | NC_000913:2073132 | T>G | EX | GCT>GCG | A>A | CP4-44                    | syn    |
| Ec 62 | NC_000913:2085248 | C>T | IG |         |     |                           |        |
| Ec 14 | NC_000913:2110939 | A>T | EX | TCT>TCA | S>S | dTDP-glucose              | syn    |
| Ec 69 | NC_000913:2136501 | C>A | EX | TTC>TTA | F>L | inner                     | nonsyn |
| Ec 6  | NC_000913:2154439 | G>A | EX | GTT>ATT | V>I | multidrug                 | nonsyn |
| Ec 13 | NC_000913:2173517 | G>T | EX | GCA>GAA | A>E | D-tagatose                | nonsyn |
| Ec 13 | NC_000913:2183882 | T>C | IG |         |     |                           |        |
| Ec 44 | NC_000913:2186233 | C>T | EX | CCG>CCA | P>P | putative                  | syn    |
| Ec 85 | NC_000913:2192922 | A>T | EX | ATG>TTG | M>L | methionyl-tRNA            | nonsyn |
| Ec 27 | NC_000913:2227875 | G>A | EX | GCG>GTG | A>V | tRNA-dihydrouridine       | nonsyn |
| Ec 61 | NC_000913:2231696 | A>C | EX | AAA>AAC | K>N | conserved                 | nonsyn |
| Ec 23 | NC_000913:2301727 | T>C | EX | TAT>CAT | Y>H | hypothetical              | nonsyn |



|       |                   |     |    |         |     |                           |        |
|-------|-------------------|-----|----|---------|-----|---------------------------|--------|
| Ec 35 | NC_000913:2312739 | G>T | EX | GCG>GCT | A>A | phosphotransfer           | syn    |
| Ec 59 | NC_000913:2334355 | G>A | EX | AGC>AGT | S>S | DUF2138                   | syn    |
| Ec 80 | NC_000913:2341516 | C>T | EX | GTA>ATA | V>I | adhesin                   | nonsyn |
| Ec 78 | NC_000913:2342414 | A>G | IG |         |     |                           |        |
| Ec 5  | NC_000913:2355276 | G>A | EX | GTG>GTA | V>V | hypothetical              | syn    |
| Ec 99 | NC_000913:2376697 | G>C | EX | GAC>GAG | D>E | bifunctional              | nonsyn |
| Ec 67 | NC_000913:2397470 | C>T | EX | GGT>AGT | G>S | NADH:ubiquinone           | nonsyn |
| Ec 66 | NC_000913:2411969 | G>T | EX | GAG>TAG | E>* | acetate                   | nonsyn |
| Ec 14 | NC_000913:2442906 | C>T | EX | GGT>GAT | G>D | inner                     | nonsyn |
| Ec 81 | NC_000913:2475550 | C>T | EX | CTG>CTA | L>L | DNA-binding               | syn    |
| Ec 50 | NC_000913:2478388 | G>C | EX | GCG>CCG | A>P | D-serine                  | nonsyn |
| Ec 71 | NC_000913:2485186 | A>G | EX | ACG>GCG | T>A | hybrid                    | nonsyn |
| Ec 16 | NC_000913:2491655 | G>T | IG |         |     |                           |        |
| Ec 23 | NC_000913:2531316 | G>A | EX | GTG>ATG | V>M | cysteine                  | nonsyn |
| Ec 53 | NC_000913:2558999 | T>A | IG |         |     |                           |        |
| Ec 56 | NC_000913:2562504 | T>C | IG |         |     |                           |        |
| Ec 80 | NC_000913:2562517 | G>T | IG |         |     |                           |        |
| Ec 99 | NC_000913:2597309 | G>A | EX | ATC>ATT | I>I | dihydrodipicolinate       | syn    |
| Ec 44 | NC_000913:2629826 | T>G | EX | GCA>GCC | A>A | GMP                       | syn    |
| Ec 66 | NC_000913:2641447 | C>A | EX | GAC>TAC | D>Y | dual                      | nonsyn |
| Ec 68 | NC_000913:2641821 | G>A | EX | GCA>GTA | A>V | dual                      | nonsyn |
| Ec 63 | NC_000913:2649622 | G>A | EX | CAG>TAG | Q>* | hypothetical              | nonsyn |
| Ec 66 | NC_000913:2653740 | G>T | EX | TCG>TAG | S>* | aminopeptidase            | nonsyn |
| Ec 59 | NC_000913:2720716 | A>C | IG |         |     |                           |        |
| Ec 96 | NC_000913:2771854 | C>T | EX | TCC>TTC | S>F | CP4-57                    | nonsyn |
| Ec 29 | NC_000913:2795582 | T>C | EX | TTA>TCA | L>S | putative                  | nonsyn |
| Ec 49 | NC_000913:2816581 | T>C | IG |         |     |                           |        |
| Ec 39 | NC_000913:2836375 | T>C | EX | GGA>GGG | G>G | DNA-binding               | syn    |
| Ec 65 | NC_000913:2856362 | G>A | EX | CCG>CCA | P>P | methyl-directed           | syn    |
| Ec 16 | NC_000913:2857900 | T>C | EX | TTC>TCC | F>S | serine/threonine-specific | nonsyn |
| Ec 59 | NC_000913:2872430 | A>G | EX | TCG>CCG | S>P | sulfate                   | nonsyn |
| Ec 29 | NC_000913:2879898 | A>G | EX | GAT>GAC | D>D | CRISP                     | syn    |
| Ec 41 | NC_000913:2909122 | T>G | EX | GAA>GAC | E>D | antitoxin                 | nonsyn |
| Ec 37 | NC_000913:2914325 | T>A | EX | CTG>CAG | L>Q | hybrid                    | nonsyn |
| Ec 91 | NC_000913:2932467 | T>C | EX | TAC>CAC | Y>H | L-fucose                  | nonsyn |
| Ec 68 | NC_000913:2939183 | T>G | EX | GAA>GCA | E>A | 23S                       | nonsyn |
| Ec 70 | NC_000913:2941560 | G>T | EX | GCA>TCA | A>S | cysteine                  | nonsyn |
| Ec 12 | NC_000913:2961471 | A>T | EX | TGG>AGG | W>R | hypothetical              | nonsyn |
| Ec 44 | NC_000913:2993131 | T>C | IG |         |     |                           |        |
| Ec 66 | NC_000913:2993903 | C>G | IG |         |     |                           |        |
| Ec 8  | NC_000913:3003313 | T>C | EX | ATC>GTC | I>V | putative                  | nonsyn |
| Ec 65 | NC_000913:3003735 | G>A | EX | GCC>GTC | A>V | putative                  | nonsyn |
| Ec 69 | NC_000913:3008229 | G>A | EX | ACG>ACA | T>T | D-stereospecific          | syn    |
| Ec 50 | NC_000913:3025203 | T>C | EX | TAT>CAT | Y>H | putative                  | nonsyn |
| Ec 39 | NC_000913:3078108 | A>C | EX | ATC>AGC | I>S | transketolase             | nonsyn |
| Ec 44 | NC_000913:3125646 | A>C | EX | ATC>AGC | I>S | glycolate                 | nonsyn |
| Ec 85 | NC_000913:3143361 | T>A | EX | CAG>CTG | Q>L | hydrogenase               | nonsyn |
| Ec 6  | NC_000913:3154268 | G>A | EX | GAT>AAT | D>N | aldehyde                  | nonsyn |
| Ec 82 | NC_000913:3156659 | T>G | EX | ATT>AGT | I>S | outer                     | nonsyn |
| Ec 11 | NC_000913:3186716 | G>A | IG |         |     |                           |        |
| Ec 79 | NC_000913:3218861 | T>C | EX | CTG>CCG | L>P | putrescine:2-oxoglutaric  | nonsyn |
| Ec 59 | NC_000913:3255556 | A>C | EX | GGT>GGG | G>G | putative                  | syn    |
| Ec 12 | NC_000913:3265238 | A>G | IG |         |     |                           |        |
| Ec 49 | NC_000913:3272211 | A>C | EX | CTG>CGG | L>R | putative                  | nonsyn |
| Ec 56 | NC_000913:3303905 | G>A | IG |         |     |                           |        |
| Ec 79 | NC_000913:3313129 | G>A | EX | GCT>GTT | A>V | fused                     | nonsyn |
| Ec 13 | NC_000913:3319333 | A>T | EX | GAT>GAA | D>E | putative                  | nonsyn |
| Ec 45 | NC_000913:3368875 | G>A | EX | CGT>TGT | R>C | putative                  | nonsyn |
| Ec 6  | NC_000913:3371956 | G>C | EX | CCA>GCA | P>A | DNA-binding               | nonsyn |

|       |                   |     |    |         |     |                         |        |
|-------|-------------------|-----|----|---------|-----|-------------------------|--------|
| Ec 45 | NC_000913:3375922 | A>C | EX | TTC>TGC | F>C | 30S                     | nonsyn |
| Ec 90 | NC_000913:3377420 | C>T | EX | CAG>CAA | Q>Q | conserved               | syn    |
| Ec 45 | NC_000913:3403174 | A>T | IG |         |     |                         |        |
| Ec 45 | NC_000913:3403196 | C>T | IG |         |     |                         |        |
| Ec 29 | NC_000913:3420219 | G>A | EX | GGG>GGA | G>G | putative                | syn    |
| Ec 63 | NC_000913:3426974 | A>G | IG |         |     |                         |        |
| Ec 41 | NC_000913:3429821 | A>G | EX | ATC>ACC | I>T | putative                | nonsyn |
| Ec 14 | NC_000913:3441706 | A>G | EX | GGT>GGC | G>G | preprotein              | syn    |
| Ec 96 | NC_000913:3446351 | C>A | EX | GAG>GAT | E>D | 30S                     | nonsyn |
| Ec 35 | NC_000913:3450134 | G>T | EX | CCG>ACG | P>T | 50S                     | nonsyn |
| Ec 28 | NC_000913:3450223 | T>A | EX | CAC>CTC | H>L | 50S                     | nonsyn |
| Ec 85 | NC_000913:3451150 | C>A | EX | CGC>CTC | R>L | 30S                     | nonsyn |
| Ec 93 | NC_000913:3451341 | A>G | IG |         |     |                         |        |
| Ec 28 | NC_000913:3487449 | T>C | EX | ACC>GCC | T>A | bifunctional            | nonsyn |
| Ec 39 | NC_000913:3499177 | G>A | EX | GGC>AGC | G>S | putative                | nonsyn |
| Ec 12 | NC_000913:3506601 | A>C | EX | GAT>GAG | D>E | putative                | nonsyn |
| Ec 29 | NC_000913:3519211 | C>T | EX | CTG>CTA | L>L | protein                 | syn    |
| Ec 61 | NC_000913:3519568 | G>A | EX | CAG>TAG | Q>* | protein                 | nonsyn |
| Ec 44 | NC_000913:3587984 | T>G | EX | ATC>CTC | I>L | glycerol-3-phosphate    | nonsyn |
| Ec 29 | NC_000913:3620862 | A>G | EX | CGA>CGG | R>R | rhsB                    | syn    |
| Ec 59 | NC_000913:3678925 | G>A | EX | CTG>TTG | L>L | putative                | syn    |
| Ec 14 | NC_000913:3704059 | G>A | IG |         |     |                         |        |
| Ec 47 | NC_000913:3752522 | C>T | IG |         |     |                         |        |
| Ec 64 | NC_000913:3796821 | G>A | EX | GCA>GTA | A>V | lipopolysaccharide      | nonsyn |
| Ec 49 | NC_000913:3833632 | G>T | EX | GGC>GGA | G>G | putative                | syn    |
| Ec 23 | NC_000913:3913443 | A>T | IG |         |     |                         |        |
| Ec 29 | NC_000913:3939677 | A>G | IG |         |     |                         |        |
| Ec 49 | NC_000913:3944645 | G>T | IG |         |     |                         |        |
| Ec 99 | NC_000913:3944942 | T>G | IG |         |     |                         |        |
| Ec 21 | NC_000913:3950600 | T>G | EX | TAT>GAT | Y>D | branched-chain          | nonsyn |
| Ec 14 | NC_000913:3991950 | T>C | EX | AAT>GAT | N>D | iron-dependent          | nonsyn |
| Ec 85 | NC_000913:4030185 | G>A | EX | CCG>CCA | P>P | proline                 | syn    |
| Ec 85 | NC_000913:4030296 | C>T | EX | TGC>TGT | C>C | proline                 | syn    |
| Ec 39 | NC_000913:4033357 | C>T | IG |         |     |                         |        |
| Ec 45 | NC_000913:4036734 | A>C | IG |         |     |                         |        |
| Ec 76 | NC_000913:4075709 | A>T | EX | AAT>TAT | N>Y | putative                | nonsyn |
| Ec 28 | NC_000913:4077138 | C>T | IG |         |     |                         |        |
| Ec 48 | NC_000913:4077216 | A>G | IG |         |     |                         |        |
| Ec 62 | NC_000913:4090438 | G>A | EX | CAG>TAG | Q>* | putative                | nonsyn |
| Ec 10 | NC_000913:4166238 | A>T | IG |         |     |                         |        |
| Ec 10 | NC_000913:4166244 | T>A | IG |         |     |                         |        |
| Ec 86 | NC_000913:4182926 | A>C | EX | CAG>CCG | Q>P | RNA                     | nonsyn |
| Ec 17 | NC_000913:4199652 | T>C | EX | GGA>GGG | G>G | Zn-dependent            | syn    |
| Ec 8  | NC_000913:4206062 | A>G | IG |         |     |                         |        |
| Ec 70 | NC_000913:4248805 | A>T | IG |         |     |                         |        |
| Ec 13 | NC_000913:4267708 | A>C | EX | GAA>GCA | E>A | acid                    | nonsyn |
| Ec 53 | NC_000913:4284754 | A>G | EX | GTA>GCA | V>A | acetyl-CoA              | nonsyn |
| Ec 44 | NC_000913:4327687 | A>C | EX | GAT>GCT | D>A | mutational              | nonsyn |
| Ec 74 | NC_000913:4380098 | C>T | EX | GTC>ATC | V>I | fumarate                | nonsyn |
| Ec 65 | NC_000913:4390487 | C>G | IG |         |     |                         |        |
| Ec 63 | NC_000913:4411810 | G>A | EX | GTG>ATG | V>M | glutathionylspermidine  | nonsyn |
| Ec 6  | NC_000913:4417711 | A>G | IG |         |     |                         |        |
| Ec 99 | NC_000913:4431312 | C>T | EX | GAT>AAT | D>N | NAD(P)H:quinone         | nonsyn |
| Ec 35 | NC_000913:4433910 | C>T | EX | GGG>AGG | G>R | 2':3'-cyclic-nucleotide | nonsyn |
| Ec 87 | NC_000913:4442956 | C>A | EX | ATC>ATA | I>I | translocation           | syn    |
| Ec 41 | NC_000913:4451827 | G>T | EX | GTG>GTT | V>V | putative                | syn    |
| Ec 86 | NC_000913:4466603 | T>G | EX | CTG>CGG | L>R | magnesium               | nonsyn |
| Ec 38 | NC_000913:4481228 | T>A | EX | GCA>GCT | A>A | valyl-tRNA              | syn    |
| Ec 17 | NC_000913:4502337 | C>A | EX | GCA>GAA | A>E | putative                | nonsyn |

|       |                   |     |    |         |     |                            |        |
|-------|-------------------|-----|----|---------|-----|----------------------------|--------|
| Ec 63 | NC_000913:4515690 | G>A | EX | TCC>TCT | S>S | KpLE2                      | syn    |
| Ec 50 | NC_000913:4522598 | T>G | EX | ACC>CCC | T>P | KpLE2                      | nonsyn |
| Ec 55 | NC_000913:4535483 | C>T | EX | GCG>GCA | A>A | 9-O-acetyl                 | syn    |
| Ec 17 | NC_000913:4580887 | C>T | EX | CGC>CAC | R>H | DNA                        | nonsyn |
| Ec 85 | NC_000913:4588983 | G>A | EX | CCG>CTG | P>L | putative                   | nonsyn |
| Ec 81 | NC_000913:4602391 | G>T | EX | CGC>CTC | R>L | bgl                        | nonsyn |
| Ec 38 | NC_000913:4612417 | T>G | IG |         |     |                            |        |
| Mf 55 | NC_006055:880     | G>T | EX | GCC>TCC | A>S | chromosome                 | nonsyn |
| Mf 12 | NC_006055:937     | G>A | EX | GTT>ATT | V>I | chromosome                 | nonsyn |
| Mf 57 | NC_006055:3688    | T>A | IG |         |     |                            |        |
| Mf 50 | NC_006055:3979    | G>C | EX | GTT>CTT | V>L | nucleotidyltransferase,    | nonsyn |
| Mf 14 | NC_006055:5544    | T>C | EX | GGT>GGC | G>G | DNA                        | syn    |
| Mf 47 | NC_006055:5851    | G>A | EX | GAT>AAT | D>N | DNA                        | nonsyn |
| Mf 42 | NC_006055:7958    | T>A | EX | ACT>ACA | T>T | DNA                        | syn    |
| Mf 92 | NC_006055:8912    | A>G | EX | TGA>TGG | *>W | DNA                        | nonsyn |
| Mf 14 | NC_006055:9651    | C>A | EX | CAA>AAA | Q>K | DNA                        | nonsyn |
| Mf 65 | NC_006055:9903    | G>A | EX | GCT>ACT | A>T | beta-glucoside             | nonsyn |
| Mf 6  | NC_006055:10267   | G>A | EX | TGT>TAT | C>Y | beta-glucoside             | nonsyn |
| Mf 39 | NC_006055:11632   | T>G | EX | ATG>AGG | M>R | beta-glucoside             | nonsyn |
| Mf 47 | NC_006055:13385   | C>T | EX | CCA>CTA | P>L | beta-glucosidase           | nonsyn |
| Mf 42 | NC_006055:14099   | C>A | EX | CGT>AGT | R>S | transcriptional            | nonsyn |
| Mf 50 | NC_006055:15075   | T>A | EX | TAT>TAA | Y>* | beta-glucosidase           | nonsyn |
| Mf 92 | NC_006055:15415   | C>T | EX | CAA>TAA | Q>* | beta-glucosidase           | nonsyn |
| Mf 58 | NC_006055:16165   | G>A | EX | GAT>AAT | D>N | beta-glucosidase           | nonsyn |
| Mf 58 | NC_006055:17611   | G>A | EX | GGA>AGA | G>R | beta-glucosidase           | nonsyn |
| Mf 58 | NC_006055:21424   | C>T | EX | GGC>AGC | G>S | arginine-ornithine         | nonsyn |
| Mf 42 | NC_006055:23722   | G>A | EX | TAC>TAT | Y>Y | seryl-tRNA                 | syn    |
| Mf 83 | NC_006055:24901   | C>T | EX | AGC>AGT | S>S | hsp33                      | syn    |
| Mf 57 | NC_006055:27072   | T>C | EX | GTT>GTC | V>V | glutamine                  | syn    |
| Mf 11 | NC_006055:27539   | C>G | EX | ACA>AGA | T>R | glutamine                  | nonsyn |
| Mf 19 | NC_006055:27981   | C>G | EX | CCC>CGC | P>R | hypothetical               | nonsyn |
| Mf 23 | NC_006055:28346   | G>T | EX | GCC>TCC | A>S | hypothetical               | nonsyn |
| Mf 76 | NC_006055:30387   | G>T | EX | GAA>TAA | E>* | hypothetical               | nonsyn |
| Mf 83 | NC_006055:33998   | G>T | EX | GGT>GTT | G>V | sn-glycerol-3-phosphate    | nonsyn |
| Mf 42 | NC_006055:34010   | G>A | EX | CGT>CAT | R>H | sn-glycerol-3-phosphate    | nonsyn |
| Mf 85 | NC_006055:35692   | G>T | EX | TTG>TTT | L>F | sn-glycerol-3-phosphate    | nonsyn |
| Mf 56 | NC_006055:37112   | T>C | EX | GAT>GAC | D>D | sn-glycerol-3-phosphate    | syn    |
| Mf 68 | NC_006055:38477   | G>A | EX | GTA>ATA | V>I | sn-glycerol-3-phosphate    | nonsyn |
| Mf 56 | NC_006055:45632   | G>C | EX | TTG>TTC | L>F | beta-glucoside             | nonsyn |
| Mf 83 | NC_006055:46675   | C>T | EX | ACA>ATA | T>I | beta-glucoside             | nonsyn |
| Mf 56 | NC_006055:47390   | G>A | EX | AGA>AAA | R>K | 6-phospho-beta-glucosidase | nonsyn |
| Mf 11 | NC_006055:47537   | C>A | EX | TCA>TAA | S>* | 6-phospho-beta-glucosidase | nonsyn |
| Mf 26 | NC_006055:48797   | T>C | EX | AAC>AGC | N>S | transporter                | nonsyn |
| Mf 76 | NC_006055:49225   | T>C | EX | TTA>TTG | L>L | transporter                | syn    |
| Mf 11 | NC_006055:49663   | T>C | EX | ATT>ACT | I>T | methionyl-tRNA             | nonsyn |
| Mf 19 | NC_006055:52834   | G>T | EX | GCG>GCT | A>A | lipolate-protein           | syn    |
| Mf 47 | NC_006055:54986   | G>T | EX | GGA>TGA | G>* | pyruvate                   | nonsyn |
| Mf 93 | NC_006055:55726   | C>G | EX | AAC>AAG | N>K | pyruvate                   | nonsyn |
| Mf 6  | NC_006055:58529   | C>G | EX | CCA>CGA | P>R | dihydrolipate              | nonsyn |
| Mf 90 | NC_006055:62693   | A>G | EX | AAA>GAA | K>E | Mg2+                       | nonsyn |
| Mf 14 | NC_006055:64420   | C>A | IG |         |     |                            |        |
| Mf 76 | NC_006055:65457   | C>T | EX | GTT>ATT | V>I | MarR                       | nonsyn |
| Mf 57 | NC_006055:67043   | C>T | EX | GCT>ACT | A>T | multidrug                  | nonsyn |
| Mf 6  | NC_006055:68595   | C>T | EX | TGA>TAA | *>* | hypothetical               | syn    |
| Mf 12 | NC_006055:69934   | C>T | IG |         |     |                            |        |
| Mf 55 | NC_006055:70086   | G>T | EX | TCT>TAT | S>Y | proline                    | nonsyn |
| Mf 57 | NC_006055:70908   | G>A | EX | AAG>AAA | K>K | preprotein                 | syn    |
| Mf 55 | NC_006055:73473   | G>A | IG |         |     |                            |        |
| Mf 12 | NC_006055:74006   | C>T | EX | ACT>ATT | T>I | excinuclease               | nonsyn |

|       |                  |     |    |         |     |                    |        |
|-------|------------------|-----|----|---------|-----|--------------------|--------|
| Mf 41 | NC_006055:75261  | A>G | EX | GAA>GAG | E>E | excinuclease       | syn    |
| Mf 93 | NC_006055:76123  | T>C | EX | GTT>GCT | V>A | repair             | nonsyn |
| Mf 76 | NC_006055:76468  | C>T | EX | ACA>ATA | T>I | repair             | nonsyn |
| Mf 76 | NC_006055:77086  | A>G | EX | CAT>CGT | H>R | repair             | nonsyn |
| Mf 19 | NC_006055:77821  | G>T | EX | GGA>GTA | G>V | repair             | nonsyn |
| Mf 11 | NC_006055:80046  | G>C | EX | TTG>TTC | L>F | transporter        | nonsyn |
| Mf 49 | NC_006055:83764  | C>A | EX | GAC>GAA | D>E | prolipoprotein     | nonsyn |
| Mf 58 | NC_006055:89160  | G>A | EX | GGA>AGA | G>R | substrate          | nonsyn |
| Mf 65 | NC_006055:91290  | C>T | EX | CAA>TAA | Q>* | cytosol            | nonsyn |
| Mf 57 | NC_006055:95579  | C>G | EX | GGC>GGG | G>G | adenylosuccinate   | syn    |
| Mf 55 | NC_006055:95951  | C>G | EX | GAC>GAG | D>E | adenylosuccinate   | nonsyn |
| Mf 23 | NC_006055:96815  | G>A | EX | GAG>AAG | E>K | adenylosuccinate   | nonsyn |
| Mf 6  | NC_006055:96891  | C>T | EX | GCA>GTA | A>V | adenylosuccinate   | nonsyn |
| Mf 92 | NC_006055:101397 | C>T | EX | CTG>TTG | L>L | hypothetical       | syn    |
| Mf 90 | NC_006055:101544 | C>G | EX | CCT>GCT | P>A | hypothetical       | nonsyn |
| Mf 49 | NC_006055:101785 | C>G | EX | TCA>TGA | S>* | hypothetical       | nonsyn |
| Mf 68 | NC_006055:102497 | C>T | IG |         |     |                    |        |
| Mf 90 | NC_006055:108570 | C>G | EX | ACA>AGA | T>R | Glu-tRNA           | nonsyn |
| Mf 99 | NC_006055:108699 | G>T | EX | TGT>TTT | C>F | Glu-tRNA           | nonsyn |
| Mf 67 | NC_006055:110775 | C>T | EX | CTA>TTA | L>L | rRNA               | syn    |
| Mf 19 | NC_006055:113671 | G>T | EX | AAG>AAT | K>N | metallo-beta       | nonsyn |
| Mf 14 | NC_006055:114754 | C>T | EX | AAC>AAT | N>N | oligopeptide       | syn    |
| Mf 56 | NC_006055:116834 | G>A | EX | GCT>ACT | A>T | oligopeptide       | nonsyn |
| Mf 12 | NC_006055:117679 | C>G | EX | CTT>GTT | L>V | oligopeptide       | nonsyn |
| Mf 56 | NC_006055:118076 | G>T | EX | AGA>ATA | R>I | oligopeptide       | nonsyn |
| Mf 59 | NC_006055:118160 | C>A | EX | ACT>AAT | T>N | oligopeptide       | nonsyn |
| Mf 47 | NC_006055:119417 | G>A | EX | GGT>AGT | G>S | oligopeptide       | nonsyn |
| Mf 93 | NC_006055:120593 | C>A | EX | GCA>GAA | A>E | oligopeptide       | nonsyn |
| Mf 90 | NC_006055:124696 | C>T | EX | ATC>ATT | I>I | DNA                | syn    |
| Mf 58 | NC_006055:125978 | C>T | EX | CCT>TCT | P>S | DNA                | nonsyn |
| Mf 12 | NC_006055:127441 | G>A | IG |         |     |                    |        |
| Mf 19 | NC_006055:127854 | C>A | EX | CCA>CAA | P>Q | repair             | nonsyn |
| Mf 76 | NC_006055:128445 | C>T | EX | ACA>ATA | T>I | repair             | nonsyn |
| Mf 57 | NC_006055:130118 | G>T | EX | GCA>TCA | A>S | tetrapyrrole       | nonsyn |
| Mf 83 | NC_006055:131141 | C>G | EX | GAA>CAA | E>Q | rhodanese-related  | nonsyn |
| Mf 49 | NC_006055:136038 | G>A | EX | AGA>AAA | R>K | ATP                | nonsyn |
| Mf 58 | NC_006055:137967 | G>A | EX | GGG>GAG | G>E | ATP                | nonsyn |
| Mf 41 | NC_006055:142455 | G>A | EX | GAT>AAT | D>N | multidrug          | nonsyn |
| Mf 58 | NC_006055:144431 | C>T | EX | ACT>ATT | T>I | phosphomannomutase | nonsyn |
| Mf 76 | NC_006055:149859 | C>T | IG |         |     |                    |        |
| Mf 12 | NC_006055:151034 | C>A | EX | TCT>TAT | S>Y | 30S                | nonsyn |
| Mf 49 | NC_006055:151490 | C>T | EX | AAC>AAT | N>N | 50S                | syn    |
| Mf 56 | NC_006055:152804 | C>T | EX | GAC>GAT | D>D | 50S                | syn    |
| Mf 23 | NC_006055:152869 | C>T | EX | TCA>TTA | S>L | 50S                | nonsyn |
| Mf 58 | NC_006055:155006 | C>T | EX | AAC>AAT | N>N | 50S                | syn    |
| Mf 55 | NC_006055:155078 | A>G | EX | GTA>GTG | V>V | 50S                | syn    |
| Mf 12 | NC_006055:156509 | G>C | EX | GGG>GGC | G>G | preprotein         | syn    |
| Mf 6  | NC_006055:158125 | C>G | EX | AAC>AAG | N>K | cytidine           | nonsyn |
| Mf 19 | NC_006055:159507 | G>C | EX | GAT>CAT | D>H | methionine         | nonsyn |
| Mf 39 | NC_006055:159961 | T>A | EX | ATT>AAT | I>N | 50S                | nonsyn |
| Mf 93 | NC_006055:161490 | C>A | EX | GCG>GAG | A>E | DNA-directed       | nonsyn |
| Mf 58 | NC_006055:161553 | C>G | EX | GCT>GGT | A>G | DNA-directed       | nonsyn |
| Mf 50 | NC_006055:162564 | C>A | EX | CAA>AAA | Q>K | cobalt             | nonsyn |
| Mf 99 | NC_006055:164938 | C>A | EX | CCT>CAT | P>H | cobalt             | nonsyn |
| Mf 68 | NC_006055:167051 | G>A | EX | GTT>ATT | V>I | substrate          | nonsyn |
| Mf 39 | NC_006055:167257 | C>A | EX | ATC>ATA | I>I | substrate          | syn    |
| Mf 93 | NC_006055:168584 | G>C | EX | GTG>CTG | V>L | substrate          | nonsyn |
| Mf 47 | NC_006055:168715 | G>A | EX | GCG>GCA | A>A | substrate          | syn    |
| Mf 58 | NC_006055:169583 | G>A | EX | GAT>AAT | D>N | substrate          | nonsyn |

|       |                  |     |    |         |     |                                |        |
|-------|------------------|-----|----|---------|-----|--------------------------------|--------|
| Mf 58 | NC_006055:171854 | A>G | EX | TAT>TGT | Y>C | hypothetical                   | nonsyn |
| Mf 58 | NC_006055:172565 | C>T | EX | ACG>ATG | T>M | hypothetical                   | nonsyn |
| Mf 23 | NC_006055:174352 | G>A | EX | TCT>TTT | S>F | hypothetical                   | nonsyn |
| Mf 92 | NC_006055:175428 | G>A | EX | TTC>TTT | F>F | hypothetical                   | syn    |
| Mf 19 | NC_006055:181686 | C>T | EX | TTC>TTT | F>F | DNA                            | syn    |
| Mf 49 | NC_006055:184687 | G>C | EX | GTA>CTA | V>L | aspartyl/glutamyl-tRNA         | nonsyn |
| Mf 58 | NC_006055:190520 | G>A | EX | ATG>ATA | M>I | methylenetetrahydrofolate      | nonsyn |
| Mf 19 | NC_006055:197380 | A>G | EX | AAA>AAG | K>K | substrate                      | syn    |
| Mf 58 | NC_006055:198338 | G>A | EX | GGG>AGG | G>R | substrate                      | nonsyn |
| Mf 99 | NC_006055:200234 | G>C | EX | GGA>GCA | G>A | guanosine                      | nonsyn |
| Mf 39 | NC_006055:202514 | G>T | EX | GAT>TAT | D>Y | dehydrogenase                  | nonsyn |
| Mf 62 | NC_006055:203053 | T>C | EX | GTA>GCA | V>A | 6-phosphofructokinase          | nonsyn |
| Mf 57 | NC_006055:204548 | G>A | EX | GAC>AAC | D>N | pyruvate                       | nonsyn |
| Mf 23 | NC_006055:204753 | C>G | EX | ACT>AGT | T>S | pyruvate                       | nonsyn |
| Mf 39 | NC_006055:205232 | G>A | EX | GTA>ATA | V>I | pyruvate                       | nonsyn |
| Mf 47 | NC_006055:206061 | G>A | IG |         |     |                                |        |
| Mf 39 | NC_006055:210357 | C>A | EX | CCT>ACT | P>T | fructose-specific              | nonsyn |
| Mf 83 | NC_006055:211515 | G>C | EX | GTA>CTA | V>L | fructose-specific              | nonsyn |
| Mf 42 | NC_006055:211522 | C>T | EX | GCC>GTC | A>V | fructose-specific              | nonsyn |
| Mf 92 | NC_006055:214957 | G>T | EX | AGA>ATA | R>I | amino                          | nonsyn |
| Mf 49 | NC_006055:216413 | G>C | EX | CAC>CAG | H>Q | formate/nitrate                | nonsyn |
| Mf 67 | NC_006055:216967 | C>A | IG |         |     |                                |        |
| Mf 6  | NC_006055:218539 | G>T | IG |         |     |                                |        |
| Mf 90 | NC_006055:220338 | C>A | EX | AGG>AGT | R>S | tryptophanyl-tRNA              | nonsyn |
| Mf 76 | NC_006055:221028 | C>G | EX | CCA>CGA | P>R | NAD                            | nonsyn |
| Mf 59 | NC_006055:224303 | T>C | EX | CTA>CCA | L>P | hypothetical                   | nonsyn |
| Mf 90 | NC_006055:224317 | G>C | EX | GAA>CAA | E>Q | hypothetical                   | nonsyn |
| Mf 6  | NC_006055:226327 | A>T | EX | AAA>AAT | K>N | GTP-binding                    | nonsyn |
| Mf 6  | NC_006055:228086 | T>C | IG |         |     |                                |        |
| Mf 39 | NC_006055:231335 | G>A | EX | GAC>AAC | D>N | recombinase                    | nonsyn |
| Mf 85 | NC_006055:235418 | G>A | EX | GAA>AAA | E>K | virulence                      | nonsyn |
| Mf 14 | NC_006055:235829 | G>A | EX | GAA>AAA | E>K | virulence                      | nonsyn |
| Mf 62 | NC_006055:236165 | G>C | EX | GTA>CTA | V>L | virulence                      | nonsyn |
| Mf 65 | NC_006055:237199 | C>T | EX | TCT>TTT | S>F | hypothetical                   | nonsyn |
| Mf 58 | NC_006055:237695 | G>C | EX | GTG>GTC | V>V | hypothetical                   | syn    |
| Mf 92 | NC_006055:238301 | C>T | EX | AAC>AAT | N>N | PTS                            | syn    |
| Mf 65 | NC_006055:242529 | C>T | IG |         |     |                                |        |
| Mf 55 | NC_006055:244653 | G>C | EX | GAT>CAT | D>H | S-adenosylmethionine-dependent | nonsyn |
| Mf 50 | NC_006055:245331 | C>A | EX | TCA>TAA | S>* | hypothetical                   | nonsyn |
| Mf 47 | NC_006055:246881 | C>T | EX | ACA>ATA | T>I | serine/threonine               | nonsyn |
| Mf 93 | NC_006055:247256 | G>C | EX | GGT>CGT | G>R | serine/threonine               | nonsyn |
| Mf 26 | NC_006055:247457 | G>T | EX | GAA>TAA | E>* | serine/threonine               | nonsyn |
| Mf 14 | NC_006055:247924 | C>T | EX | GAC>GAT | D>D | serine/threonine               | syn    |
| Mf 56 | NC_006055:248189 | G>A | EX | GAA>AAA | E>K | serine/threonine               | nonsyn |
| Mf 59 | NC_006055:250037 | G>T | EX | GAA>TAA | E>* | hypothetical                   | nonsyn |
| Mf 76 | NC_006055:251290 | G>C | EX | TGT>TCT | C>S | hypothetical                   | nonsyn |
| Mf 26 | NC_006055:251317 | C>A | EX | GCT>GAT | A>D | hypothetical                   | nonsyn |
| Mf 58 | NC_006055:254026 | G>A | EX | GCA>ACA | A>T | dihydroxyacetone               | nonsyn |
| Mf 92 | NC_006055:256804 | G>A | EX | GAT>AAT | D>N | structural                     | nonsyn |
| Mf 56 | NC_006055:262342 | T>C | EX | TAC>CAC | Y>H | phosphate                      | nonsyn |
| Mf 65 | NC_006055:263612 | G>T | EX | GAA>TAA | E>* | phosphate                      | nonsyn |
| Mf 93 | NC_006055:264210 | A>C | IG |         |     |                                |        |
| Mf 56 | NC_006055:268748 | C>A | EX | CGT>AGT | R>S | membrane                       | nonsyn |
| Mf 67 | NC_006055:269086 | C>T | EX | TAC>TAT | Y>Y | membrane                       | syn    |
| Mf 58 | NC_006055:269855 | C>T | EX | AAC>AAT | N>N | tRNA                           | syn    |
| Mf 50 | NC_006055:270629 | T>C | EX | CCT>CCC | P>P | tRNA                           | syn    |
| Mf 50 | NC_006055:271955 | C>G | EX | GCT>GGT | A>G | cmp-binding                    | nonsyn |
| Mf 6  | NC_006055:275005 | C>T | EX | GAA>AAA | E>K | hypothetical                   | nonsyn |
| Mf 85 | NC_006055:276438 | C>A | EX | GTA>TTA | V>L | hypothetical                   | nonsyn |

|       |                  |     |    |         |     |                      |        |
|-------|------------------|-----|----|---------|-----|----------------------|--------|
| Mf 76 | NC_006055:277561 | A>T | EX | GAT>GAA | D>E | hypothetical         | nonsyn |
| Mf 58 | NC_006055:281533 | G>A | EX | GAT>AAT | D>N | aldo/keto            | nonsyn |
| Mf 99 | NC_006055:284867 | G>T | EX | GGT>TGT | G>C | multidrug            | nonsyn |
| Mf 68 | NC_006055:289583 | G>A | EX | GTT>ATT | V>I | hypothetical         | nonsyn |
| Mf 90 | NC_006055:294286 | T>G | EX | CTT>CTG | L>L | substrate            | syn    |
| Mf 42 | NC_006055:295358 | G>T | EX | GAT>TAT | D>Y | substrate            | nonsyn |
| Mf 58 | NC_006055:297174 | G>A | EX | GTA>ATA | V>I | substrate            | nonsyn |
| Mf 49 | NC_006055:297716 | G>T | EX | GCG>GCT | A>A | substrate            | syn    |
| Mf 49 | NC_006055:303632 | A>G | EX | TGA>TGG | *>W | multidrug            | nonsyn |
| Mf 85 | NC_006055:304618 | G>A | EX | GGT>AGT | G>S | metal-dependent      | nonsyn |
| Mf 50 | NC_006055:306493 | G>C | IG |         |     |                      |        |
| Mf 49 | NC_006055:308466 | G>C | EX | GTT>CTT | V>L | DNA                  | nonsyn |
| Mf 19 | NC_006055:310242 | C>T | EX | TAC>TAT | Y>Y | RNA                  | syn    |
| Mf 59 | NC_006055:311071 | C>A | EX | CAT>AAT | H>N | RNA                  | nonsyn |
| Mf 67 | NC_006055:311501 | G>A | EX | GAT>AAT | D>N | SAM-dependent        | nonsyn |
| Mf 12 | NC_006055:311734 | C>T | EX | AAC>AAT | N>N | SAM-dependent        | syn    |
| Mf 93 | NC_006055:314539 | G>A | EX | GGA>GAA | G>E | hypothetical         | nonsyn |
| Mf 99 | NC_006055:315564 | G>C | EX | GAA>CAA | E>Q | hypothetical         | nonsyn |
| Mf 41 | NC_006055:316795 | G>T | EX | GAG>GAT | E>D | protein-export       | nonsyn |
| Mf 65 | NC_006055:319587 | G>A | EX | GGA>GAA | G>E | protein-export       | nonsyn |
| Mf 57 | NC_006055:324024 | C>T | EX | CAC>CAT | H>H | hypothetical         | syn    |
| Mf 19 | NC_006055:324141 | G>C | EX | ATG>ATC | M>I | hypothetical         | nonsyn |
| Mf 19 | NC_006055:327322 | C>T | EX | GCA>GTA | A>V | hypothetical         | nonsyn |
| Mf 57 | NC_006055:330221 | C>T | EX | GTC>GTT | V>V | DNA                  | syn    |
| Mf 68 | NC_006055:331452 | G>A | EX | GAC>AAC | D>N | DNA                  | nonsyn |
| Mf 39 | NC_006055:334556 | C>T | EX | ACA>ATA | T>I | DAD(P)H              | nonsyn |
| Mf 50 | NC_006055:336440 | T>C | EX | ATT>ACT | I>T | hypothetical         | nonsyn |
| Mf 55 | NC_006055:339010 | A>G | EX | TAT>TGT | Y>C | translation          | nonsyn |
| Mf 85 | NC_006055:341167 | T>A | EX | TTT>ATT | F>I | hypothetical         | nonsyn |
| Mf 11 | NC_006055:341564 | C>A | EX | CCA>CAA | P>Q | hypothetical         | nonsyn |
| Mf 41 | NC_006055:348869 | C>T | EX | TTC>TTT | F>F | deoxycytosine        | syn    |
| Mf 90 | NC_006055:349980 | G>C | EX | GCA>CCA | A>P | deoxycytosine        | nonsyn |
| Mf 92 | NC_006055:350801 | C>T | EX | ACA>ATA | T>I | hypothetical         | nonsyn |
| Mf 12 | NC_006055:351344 | G>T | EX | AGA>ATA | R>I | hypothetical         | nonsyn |
| Mf 65 | NC_006055:353519 | A>T | EX | AAT>AAA | N>K | type                 | nonsyn |
| Mf 6  | NC_006055:356160 | G>A | EX | GGT>GAT | G>D | DNA                  | nonsyn |
| Mf 26 | NC_006055:358919 | G>A | EX | GAA>AAA | E>K | DNA                  | nonsyn |
| Mf 50 | NC_006055:362129 | C>T | EX | CTA>TTA | L>L | beta-glucoside       | syn    |
| Mf 12 | NC_006055:362363 | G>T | EX | GTT>TTT | V>F | beta-glucoside       | nonsyn |
| Mf 57 | NC_006055:366801 | G>A | EX | GCT>ACT | A>T | DNA                  | nonsyn |
| Mf 65 | NC_006055:369017 | G>A | EX | GCT>ACT | A>T | lysophospholipase    | nonsyn |
| Mf 58 | NC_006055:369212 | G>A | EX | GAT>AAT | D>N | lysophospholipase    | nonsyn |
| Mf 76 | NC_006055:371938 | G>A | EX | TTG>TTA | L>L | alpha                | syn    |
| Mf 76 | NC_006055:373065 | G>T | EX | GAA>TAA | E>* | beta-glucoside       | nonsyn |
| Mf 49 | NC_006055:375644 | G>T | EX | CAT>AAT | H>N | hypothetical         | nonsyn |
| Mf 62 | NC_006055:378647 | C>T | EX | TCT>TTT | S>F | exodeoxyribonuclease | nonsyn |
| Mf 57 | NC_006055:380197 | G>T | EX | TCA>TAA | S>* | hypothetical         | nonsyn |
| Mf 68 | NC_006055:380440 | G>A | EX | TCA>TTA | S>L | hypothetical         | nonsyn |
| Mf 58 | NC_006055:383797 | G>T | EX | TCA>TAA | S>* | hypothetical         | nonsyn |
| Mf 41 | NC_006055:387466 | G>T | EX | TCA>TAA | S>* | rRNA                 | nonsyn |
| Mf 55 | NC_006055:389221 | C>A | EX | AGA>ATA | R>I | exodeoxyribonuclease | nonsyn |
| Mf 58 | NC_006055:390543 | G>T | EX | TCA>TAA | S>* | endonuclease         | nonsyn |
| Mf 65 | NC_006055:390670 | C>T | EX | GCA>ACA | A>T | endonuclease         | nonsyn |
| Mf 57 | NC_006055:391566 | G>T | EX | GCT>GAT | A>D | riboflavin           | nonsyn |
| Mf 19 | NC_006055:394773 | C>A | EX | GTG>TTG | V>L | hypothetical         | nonsyn |
| Mf 12 | NC_006055:394872 | C>T | EX | GAT>AAT | D>N | hypothetical         | nonsyn |
| Mf 11 | NC_006055:395189 | G>A | EX | TCA>TTA | S>L | hypothetical         | nonsyn |
| Mf 23 | NC_006055:397049 | A>T | IG |         |     |                      |        |
| Mf 23 | NC_006055:397601 | G>A | EX | GCA>ACA | A>T | GMP                  | nonsyn |

|       |                  |     |    |         |     |                                |        |
|-------|------------------|-----|----|---------|-----|--------------------------------|--------|
| Mf 6  | NC_006055:397953 | C>T | EX | GCT>GTT | A>V | GMP                            | nonsyn |
| Mf 83 | NC_006055:401473 | G>C | EX | TTC>TTG | F>L | chitinase                      | nonsyn |
| Mf 67 | NC_006055:401825 | G>T | EX | CCT>CAT | P>H | chitinase                      | nonsyn |
| Mf 42 | NC_006055:402425 | C>A | EX | GGA>GTA | G>V | chitinase                      | nonsyn |
| Mf 99 | NC_006055:403449 | A>T | EX | TCA>ACA | S>T | chitinase                      | nonsyn |
| Mf 99 | NC_006055:403450 | A>T | EX | GTT>GTA | V>V | chitinase                      | syn    |
| Mf 99 | NC_006055:403455 | A>T | EX | TAT>AAT | Y>N | chitinase                      | nonsyn |
| Mf 62 | NC_006055:409021 | G>A | EX | CAA>TAA | Q>* | hypothetical                   | nonsyn |
| Mf 92 | NC_006055:410584 | A>G | EX | TTA>CTA | L>L | chromosome                     | syn    |
| Mf 92 | NC_006055:410585 | G>A | EX | TTC>TTT | F>F | chromosome                     | syn    |
| Mf 57 | NC_006055:411195 | G>A | EX | TCA>TTA | S>L | chromosome                     | nonsyn |
| Mf 11 | NC_006055:414792 | G>A | EX | TAC>TAT | Y>Y | valyl-tRNA                     | syn    |
| Mf 14 | NC_006055:416659 | C>A | EX | GAT>TAT | D>Y | Mg2+                           | nonsyn |
| Mf 19 | NC_006055:421247 | C>A | EX | TCA>TAA | S>* | hypothetical                   | nonsyn |
| Mf 65 | NC_006055:422425 | G>A | EX | CAA>TAA | Q>* | 30S                            | nonsyn |
| Mf 90 | NC_006055:422899 | T>G | EX | TTA>TTC | L>F | hypothetical                   | nonsyn |
| Mf 19 | NC_006055:426085 | G>A | EX | ACA>ATA | T>I | histidyl-tRNA                  | nonsyn |
| Mf 42 | NC_006055:427320 | G>A | EX | CTA>TTA | L>L | hypothetical                   | syn    |
| Mf 49 | NC_006055:429160 | G>T | EX | CAT>AAT | H>N | hypothetical                   | nonsyn |
| Mf 55 | NC_006055:429611 | C>G | EX | ACA>AGA | T>R | 30S                            | nonsyn |
| Mf 62 | NC_006055:429615 | G>A | EX | GCG>GCA | A>A | 30S                            | syn    |
| Mf 58 | NC_006055:429882 | G>A | EX | CAA>TAA | Q>* | DNA                            | nonsyn |
| Mf 59 | NC_006055:431586 | G>A | EX | CAA>TAA | Q>* | DNA                            | nonsyn |
| Mf 41 | NC_006055:432601 | A>G | EX | ATT>ACT | I>T | ribosome-binding               | nonsyn |
| Mf 58 | NC_006055:434827 | C>T | EX | TGA>TAA | *>* | rRNA                           | syn    |
| Mf 62 | NC_006055:435114 | C>A | EX | GAT>TAT | D>Y | xanthosine                     | nonsyn |
| Mf 65 | NC_006055:435845 | T>G | EX | TTT>TTG | F>L | choline                        | nonsyn |
| Mf 19 | NC_006055:439968 | G>A | IG |         |     |                                |        |
| Mf 49 | NC_006055:441361 | G>T | EX | GGA>TGA | G>* | hypothetical                   | nonsyn |
| Mf 83 | NC_006055:441941 | C>T | IG |         |     |                                |        |
| Mf 26 | NC_006055:442143 | T>C | EX | CAT>CGT | H>R | 1-acyl-sn-glycerol-3-phosphate | nonsyn |
| Mf 41 | NC_006055:444902 | G>A | EX | TCA>TTA | S>L | hypothetical                   | nonsyn |
| Mf 59 | NC_006055:444959 | G>A | EX | CCA>CTA | P>L | hypothetical                   | nonsyn |
| Mf 47 | NC_006055:447308 | C>G | EX | GGA>CGA | G>R | lipoprotein                    | nonsyn |
| Mf 93 | NC_006055:447393 | C>A | EX | ATG>ATT | M>I | lipoprotein                    | nonsyn |
| Mf 58 | NC_006055:448432 | C>T | EX | TTG>TTA | L>L | isoleucyl-tRNA                 | syn    |
| Mf 93 | NC_006055:449769 | C>A | EX | GTT>TTT | V>F | isoleucyl-tRNA                 | nonsyn |
| Mf 76 | NC_006055:449805 | G>T | EX | CGT>AGT | R>S | isoleucyl-tRNA                 | nonsyn |
| Mf 58 | NC_006055:449909 | G>A | EX | ACA>ATA | T>I | isoleucyl-tRNA                 | nonsyn |
| Mf 39 | NC_006055:451989 | G>C | EX | TCC>TCG | S>S | hypothetical                   | syn    |
| Mf 6  | NC_006055:452222 | G>A | EX | GCT>GTT | A>V | cell                           | nonsyn |
| Mf 26 | NC_006055:452235 | C>A | EX | GTA>TTA | V>L | cell                           | nonsyn |
| Mf 12 | NC_006055:452331 | C>T | EX | GTT>ATT | V>I | cell                           | nonsyn |
| Mf 68 | NC_006055:452334 | C>T | EX | GTT>ATT | V>I | cell                           | nonsyn |
| Mf 26 | NC_006055:452799 | G>A | EX | CAA>TAA | Q>* | cell                           | nonsyn |
| Mf 49 | NC_006055:452856 | C>G | EX | GCT>CCT | A>P | cell                           | nonsyn |
| Mf 12 | NC_006055:453422 | A>G | EX | TAT>CAT | Y>H | hypothetical                   | nonsyn |
| Mf 55 | NC_006055:453756 | C>T | EX | ATG>ATA | M>I | hypothetical                   | nonsyn |
| Mf 23 | NC_006055:454220 | G>A | EX | CCA>TCA | P>S | hypothetical                   | nonsyn |
| Mf 58 | NC_006055:454382 | C>T | EX | GAA>AAA | E>K | hypothetical                   | nonsyn |
| Mf 65 | NC_006055:454496 | C>A | IG |         |     |                                |        |
| Mf 39 | NC_006055:454536 | G>A | EX | AGC>AGT | S>S | S-adenosyl-methyltransferase   | syn    |
| Mf 42 | NC_006055:455013 | G>T | EX | AAC>AAA | N>K | S-adenosyl-methyltransferase   | nonsyn |
| Mf 65 | NC_006055:455464 | C>A | EX | GCT>TCT | A>S | cell                           | nonsyn |
| Mf 68 | NC_006055:456315 | G>A | EX | ACT>ATT | T>I | hypothetical                   | nonsyn |
| Mf 62 | NC_006055:461113 | C>A | EX | GAA>TAA | E>* | substrate                      | nonsyn |
| Mf 92 | NC_006055:463957 | C>A | EX | GCA>TCA | A>S | substrate                      | nonsyn |
| Mf 99 | NC_006055:472448 | C>T | EX | GCT>ACT | A>T | class                          | nonsyn |
| Mf 68 | NC_006055:472456 | C>A | EX | GGA>GTA | G>V | class                          | nonsyn |

|       |                  |     |    |         |     |                                  |        |
|-------|------------------|-----|----|---------|-----|----------------------------------|--------|
| Mf 19 | NC_006055:472648 | A>G | EX | ATT>ACT | I>T | class                            | nonsyn |
| Mf 11 | NC_006055:473147 | C>A | EX | GAA>TAA | E>* | class                            | nonsyn |
| Mf 26 | NC_006055:473264 | G>T | EX | CAA>AAA | Q>K | class                            | nonsyn |
| Mf 6  | NC_006055:473516 | G>T | EX | CAT>AAT | H>N | class                            | nonsyn |
| Mf 62 | NC_006055:473578 | C>G | EX | TGA>TCA | *>S | class                            | nonsyn |
| Mf 85 | NC_006055:473693 | C>A | EX | GAA>TAA | E>* | class                            | nonsyn |
| Mf 41 | NC_006055:474371 | G>C | EX | CAG>GAG | Q>E | class                            | nonsyn |
| Mf 76 | NC_006055:474442 | C>T | EX | GGA>GAA | G>E | class                            | nonsyn |
| Mf 19 | NC_006055:476970 | G>T | EX | CAA>AAA | Q>K | hypothetical                     | nonsyn |
| Mf 11 | NC_006055:477017 | G>A | EX | TCA>TTA | S>L | hypothetical                     | nonsyn |
| Mf 76 | NC_006055:480986 | A>C | EX | TTT>TTG | F>L | hypothetical                     | nonsyn |
| Mf 93 | NC_006055:482305 | C>A | EX | GCT>TCT | A>S | tRNA-specific                    | nonsyn |
| Mf 50 | NC_006055:482711 | G>T | EX | CAA>AAA | Q>K | xanthine/uracil                  | nonsyn |
| Mf 90 | NC_006055:486103 | G>A | EX | GCG>GTG | A>V | molecular                        | nonsyn |
| Mf 19 | NC_006055:486245 | C>T | EX | GAA>AAA | E>K | molecular                        | nonsyn |
| Mf 90 | NC_006055:488795 | G>T | IG |         |     |                                  |        |
| Mf 42 | NC_006055:490193 | G>A | EX | ACT>ATT | T>I | ATPase                           | nonsyn |
| Mf 47 | NC_006055:490514 | G>A | EX | TCA>TTA | S>L | ATPase                           | nonsyn |
| Mf 76 | NC_006055:493045 | C>T | EX | CTG>CTA | L>L | holliday                         | syn    |
| Mf 49 | NC_006055:495182 | C>A | EX | TGA>TTA | *>L | multidrug                        | nonsyn |
| Mf 85 | NC_006055:498717 | T>C | EX | TTC>TCC | F>S | beta-glucosidase                 | nonsyn |
| Mf 47 | NC_006055:499319 | G>A | EX | GTT>ATT | V>I | beta-glucosidase                 | nonsyn |
| Mf 59 | NC_006055:500526 | C>G | EX | GCA>GGA | A>G | trehalose/sucrose/beta-glucoside | nonsyn |
| Mf 57 | NC_006055:504931 | T>G | EX | ATC>CTC | I>L | hypothetical                     | nonsyn |
| Mf 83 | NC_006055:507222 | G>C | EX | ACA>AGA | T>R | hypothetical                     | nonsyn |
| Mf 58 | NC_006055:508938 | C>G | EX | TTG>TTC | L>F | 6-phospho-beta-glucosidase       | nonsyn |
| Mf 56 | NC_006055:510689 | A>G | EX | TAC>CAC | Y>H | transcriptional                  | nonsyn |
| Mf 39 | NC_006055:511628 | C>A | EX | GGA>TGA | G>* | hypothetical                     | nonsyn |
| Mf 90 | NC_006055:512062 | G>T | EX | ATG>ATT | M>I | hypothetical                     | nonsyn |
| Mf 58 | NC_006055:514705 | G>A | EX | GCT>GTT | A>V | arginine                         | nonsyn |
| Mf 58 | NC_006055:517256 | C>T | IG |         |     |                                  |        |
| Mf 6  | NC_006055:518237 | A>G | EX | TTA>TCA | L>S | hypothetical                     | nonsyn |
| Mf 90 | NC_006055:521293 | C>A | EX | GAT>TAT | D>Y | membrane-associated              | nonsyn |
| Mf 55 | NC_006055:523043 | C>A | IG |         |     |                                  |        |
| Mf 12 | NC_006055:523496 | G>T | IG |         |     |                                  |        |
| Mf 58 | NC_006055:523739 | A>G | IG |         |     |                                  |        |
| Mf 76 | NC_006055:524223 | G>T | IG |         |     |                                  |        |
| Mf 58 | NC_006055:524328 | G>T | IG |         |     |                                  |        |
| Mf 50 | NC_006055:525001 | C>T | EX | ATG>ATA | M>I | membrane-associated              | nonsyn |
| Mf 47 | NC_006055:526392 | C>T | EX | GAT>AAT | D>N | membrane-associated              | nonsyn |
| Mf 6  | NC_006055:526610 | C>T | EX | GGA>GAA | G>E | membrane-associated              | nonsyn |
| Mf 92 | NC_006055:527046 | C>T | EX | GAA>AAA | E>K | membrane-associated              | nonsyn |
| Mf 76 | NC_006055:531159 | T>G | IG |         |     |                                  |        |
| Mf 58 | NC_006055:531646 | G>A | EX | TCA>TTA | S>L | hypothetical                     | nonsyn |
| Mf 23 | NC_006055:532517 | A>C | EX | GTT>GTG | V>V | multidrug                        | syn    |
| Mf 11 | NC_006055:534758 | G>A | IG |         |     |                                  |        |
| Mf 47 | NC_006055:536946 | G>A | EX | ACA>ATA | T>I | histone-like                     | nonsyn |
| Mf 19 | NC_006055:537926 | T>A | EX | TTA>TTT | L>F | histone-like                     | nonsyn |
| Mf 58 | NC_006055:538407 | G>A | EX | ACT>ATT | T>I | hypothetical                     | nonsyn |
| Mf 59 | NC_006055:539559 | G>A | EX | ACT>ATT | T>I | hypothetical                     | nonsyn |
| Mf 49 | NC_006055:540304 | C>T | EX | GGC>GAC | G>D | hypothetical                     | nonsyn |
| Mf 58 | NC_006055:540340 | G>A | EX | ACA>ATA | T>I | hypothetical                     | nonsyn |
| Mf 41 | NC_006055:541068 | G>C | EX | TAC>TAG | Y>* | hypothetical                     | nonsyn |
| Mf 59 | NC_006055:541640 | C>A | EX | GGT>TGT | G>C | hypothetical                     | nonsyn |
| Mf 39 | NC_006055:544108 | G>T | EX | TCA>TAA | S>* | hypothetical                     | nonsyn |
| Mf 12 | NC_006055:545977 | G>A | EX | GCA>GTA | A>V | multidrug                        | nonsyn |
| Mf 19 | NC_006055:546911 | C>T | EX | GAA>AAA | E>K | multidrug                        | nonsyn |
| Mf 65 | NC_006055:547934 | C>T | EX | GTA>ATA | V>I | multidrug                        | nonsyn |
| Mf 93 | NC_006055:548212 | G>T | EX | TCA>TAA | S>* | multidrug                        | nonsyn |



|       |                  |     |    |         |     |                                |        |
|-------|------------------|-----|----|---------|-----|--------------------------------|--------|
| Mf 99 | NC_006055:550696 | C>T | EX | GTG>GTA | V>V | phosphatidylglycerophosphatase | syn    |
| Mf 26 | NC_006055:554350 | C>A | EX | TTC>TTA | F>L | GTP-binding                    | nonsyn |
| Mf 57 | NC_006055:555265 | C>A | IG |         |     |                                |        |
| Mf 49 | NC_006055:555848 | C>T | EX | GTT>ATT | V>I | nucleoside                     | nonsyn |
| Mf 93 | NC_006055:558669 | C>A | EX | GGG>GTG | G>V | GTP-binding                    | nonsyn |
| Mf 68 | NC_006055:559862 | C>T | IG |         |     |                                |        |
| Mf 49 | NC_006055:560650 | T>G | EX | ATT>CTT | I>L | prolyl-tRNA                    | nonsyn |
| Mf 12 | NC_006055:561732 | T>C | EX | TAC>TGC | Y>C | prolyl-tRNA                    | nonsyn |
| Mf 62 | NC_006055:561991 | C>T | EX | GGA>GAA | G>E | hypothetical                   | nonsyn |
| Mf 67 | NC_006055:565625 | C>T | EX | GTT>ATT | V>I | asparaginyl-tRNA               | nonsyn |
| Mf 47 | NC_006055:565949 | C>A | EX | GAC>TAC | D>Y | asparaginyl-tRNA               | nonsyn |
| Mf 62 | NC_006055:567517 | C>T | EX | GTA>ATA | V>I | lipase                         | nonsyn |
| Mf 41 | NC_006055:569317 | G>T | EX | CCT>ACT | P>T | DNA-binding/iron               | nonsyn |
| Mf 58 | NC_006055:570305 | C>T | EX | GAG>GAA | E>E | hypothetical                   | syn    |
| Mf 67 | NC_006055:570997 | C>T | EX | GCA>ACA | A>T | hypothetical                   | nonsyn |
| Mf 47 | NC_006055:572809 | C>G | EX | GTA>CTA | V>L | hypothetical                   | nonsyn |
| Mf 6  | NC_006055:573092 | G>A | EX | AAC>AAT | N>N | hypothetical                   | syn    |
| Mf 39 | NC_006055:573709 | C>T | EX | GCA>ACA | A>T | hypothetical                   | nonsyn |
| Mf 47 | NC_006055:575847 | G>C | EX | TCA>TGA | S>* | leucyl-tRNA                    | nonsyn |
| Mf 67 | NC_006055:575852 | A>G | EX | GGT>GGC | G>G | leucyl-tRNA                    | syn    |
| Mf 56 | NC_006055:578464 | C>T | EX | ATG>ATA | M>I | hypothetical                   | nonsyn |
| Mf 39 | NC_006055:578965 | C>T | EX | GGA>AGA | G>R | 30S                            | nonsyn |
| Mf 85 | NC_006055:580964 | G>A | EX | CCA>TCA | P>S | Mg2+                           | nonsyn |
| Mf 58 | NC_006055:581065 | G>A | EX | ACA>ATA | T>I | Mg2+                           | nonsyn |
| Mf 14 | NC_006055:581368 | T>C | EX | GAA>GGA | E>G | Mg2+                           | nonsyn |
| Mf 26 | NC_006055:586812 | A>G | EX | GGT>GGC | G>G | trehalose                      | syn    |
| Mf 57 | NC_006055:588663 | T>G | EX | CAA>CCA | Q>P | trehalose                      | nonsyn |
| Mf 76 | NC_006055:592003 | G>C | EX | GCT>GGT | A>G | triosephosphate                | nonsyn |
| Mf 47 | NC_006055:593026 | T>C | EX | GAT>GGT | D>G | hypothetical                   | nonsyn |
| Mf 99 | NC_006055:593229 | G>C | EX | AAC>AAG | N>K | hypothetical                   | nonsyn |
| Mf 42 | NC_006055:593553 | C>A | EX | ATG>ATT | M>I | hypothetical                   | nonsyn |
| Mf 93 | NC_006055:593868 | C>A | EX | AAG>AAT | K>N | hypothetical                   | nonsyn |
| Mf 83 | NC_006055:596599 | C>T | IG |         |     |                                |        |
| Mf 6  | NC_006055:598141 | G>A | EX | CCT>CTT | P>L | hypothetical                   | nonsyn |
| Mf 59 | NC_006055:602385 | C>G | EX | GTG>CTG | V>L | spermidine/putrescine          | nonsyn |
| Mf 85 | NC_006055:603323 | G>C | EX | CAC>CAG | H>Q | spermidine/putrescine          | nonsyn |
| Mf 67 | NC_006055:604570 | G>T | IG |         |     |                                |        |
| Mf 58 | NC_006055:605201 | C>T | EX | GGT>AGT | G>S | HAD-superfamily                | nonsyn |
| Mf 55 | NC_006055:610126 | C>T | EX | GGT>AGT | G>S | sucrose                        | nonsyn |
| Mf 47 | NC_006055:610520 | A>C | IG |         |     |                                |        |
| Mf 85 | NC_006055:611082 | C>T | IG |         |     |                                |        |
| Mf 55 | NC_006055:611205 | C>A | EX | ATG>ATT | M>I | phosphoenolpyruvate-protein    | nonsyn |
| Mf 99 | NC_006055:613403 | C>A | EX | GGT>TGT | G>C | NH3-dependent                  | nonsyn |
| Mf 23 | NC_006055:613576 | G>T | EX | TCT>TAT | S>Y | NH3-dependent                  | nonsyn |
| Mf 59 | NC_006055:613676 | G>A | EX | CCG>TCG | P>S | NH3-dependent                  | nonsyn |
| Mf 92 | NC_006055:616893 | A>G | EX | CGT>CGC | R>R | ATP-dependent                  | syn    |
| Mf 50 | NC_006055:617221 | T>C | EX | AAT>AGT | N>S | ATP-dependent                  | nonsyn |
| Mf 50 | NC_006055:617222 | T>C | EX | AAT>GAT | N>D | ATP-dependent                  | nonsyn |
| Mf 56 | NC_006055:617305 | C>A | EX | AGA>ATA | R>I | ATP-dependent                  | nonsyn |
| Mf 93 | NC_006055:617507 | C>T | EX | GTT>ATT | V>I | ATP-dependent                  | nonsyn |
| Mf 23 | NC_006055:619728 | G>A | EX | GCA>GTA | A>V | sucrose-6-phosphate            | nonsyn |
| Mf 58 | NC_006055:620021 | T>A | EX | ACA>ACT | T>T | sucrose-6-phosphate            | syn    |
| Mf 49 | NC_006055:620657 | C>T | EX | GTT>ATT | V>I | sucrose                        | nonsyn |
| Mf 83 | NC_006055:621365 | C>G | EX | GAT>CAT | D>H | sucrose                        | nonsyn |
| Mf 99 | NC_006055:623813 | G>A | EX | GCT>GTT | A>V | ribonucleotide-diphosphate     | nonsyn |
| Mf 56 | NC_006055:624419 | C>A | EX | GAA>TAA | E>* | ribonucleotide-diphosphate     | nonsyn |
| Mf 90 | NC_006055:626728 | T>C | EX | GAC>GGC | D>G | hypothetical                   | nonsyn |
| Mf 59 | NC_006055:629205 | C>T | EX | GGA>AGA | G>R | multidrug                      | nonsyn |
| Mf 68 | NC_006055:629220 | A>T | EX | TAC>AAC | Y>N | multidrug                      | nonsyn |

|       |                  |     |    |         |     |                         |        |
|-------|------------------|-----|----|---------|-----|-------------------------|--------|
| Mf 83 | NC_006055:629327 | G>A | EX | ACA>ATA | T>I | multidrug               | nonsyn |
| Mf 67 | NC_006055:629955 | C>T | EX | GTG>ATG | V>M | multidrug               | nonsyn |
| Mf 58 | NC_006055:630138 | C>A | EX | GAA>TAA | E>* | multidrug               | nonsyn |
| Mf 93 | NC_006055:630486 | G>A | EX | CAA>TAA | Q>* | multidrug               | nonsyn |
| Mf 39 | NC_006055:631318 | G>A | EX | CAT>TAT | H>Y | multidrug/protein/lipid | nonsyn |
| Mf 58 | NC_006055:631682 | T>A | EX | ACA>ACT | T>T | multidrug/protein/lipid | syn    |
| Mf 67 | NC_006055:632146 | G>C | EX | CAA>GAA | Q>E | multidrug/protein/lipid | nonsyn |
| Mf 58 | NC_006055:632239 | T>C | EX | ACT>GCT | T>A | multidrug/protein/lipid | nonsyn |
| Mf 67 | NC_006055:633492 | G>A | EX | TCA>TTA | S>L | single                  | nonsyn |
| Mf 19 | NC_006055:633813 | C>G | EX | GAA>CAA | E>Q | ribonuclease            | nonsyn |
| Mf 59 | NC_006055:635956 | C>T | EX | AGG>AAG | R>K | tRNA                    | nonsyn |
| Mf 39 | NC_006055:637099 | C>A | EX | GCA>TCA | A>S | 30S                     | nonsyn |
| Mf 99 | NC_006055:637799 | C>A | EX | ATG>ATT | M>I | hypothetical            | nonsyn |
| Mf 55 | NC_006055:638455 | T>C | EX | TCT>TCC | S>S | inorganic               | syn    |
| Mf 23 | NC_006055:639320 | T>C | EX | AAC>AGC | N>S | hypothetical            | nonsyn |
| Mf 67 | NC_006055:640546 | G>A | EX | GCT>GTT | A>V | hypothetical            | nonsyn |
| Mf 58 | NC_006055:640753 | G>C | EX | GAC>GAG | D>E | deoxynucleoside         | nonsyn |
| Mf 83 | NC_006055:641330 | A>G | EX | GAT>GAC | D>D | 23S                     | syn    |
| Mf 14 | NC_006055:643248 | G>A | EX | GCA>GTA | A>V | chromosomal             | nonsyn |
| Mf 99 | NC_006055:644453 | G>C | EX | GAC>GAG | D>E | hypothetical            | nonsyn |
| Mf 56 | NC_006055:645436 | C>A | EX | GTA>TTA | V>L | hypothetical            | nonsyn |
| Mf 92 | NC_006055:647355 | G>T | EX | TTC>TTA | F>L | arginyl-tRNA            | nonsyn |
| Mf 92 | NC_006055:648499 | G>C | EX | TCA>TGA | S>* | ribosome                | nonsyn |
| Mf 85 | NC_006055:650459 | G>T | EX | CAT>AAT | H>N | chitin                  | nonsyn |
| Mf 99 | NC_006055:650879 | G>A | EX | GCT>GTT | A>V | hypothetical            | nonsyn |
| Mf 90 | NC_006055:651395 | C>A | EX | GAT>TAT | D>Y | elongation              | nonsyn |
| Mf 14 | NC_006055:652274 | C>A | EX | GTA>TTA | V>L | 30S                     | nonsyn |
| Mf 41 | NC_006055:652370 | C>T | EX | GTA>ATA | V>I | 30S                     | nonsyn |
| Mf 39 | NC_006055:653542 | G>A | EX | TCA>TTA | S>L | transporter             | nonsyn |
| Mf 56 | NC_006055:656145 | G>C | EX | GCA>GGA | A>G | CAAX                    | nonsyn |
| Mf 12 | NC_006055:657159 | G>A | EX | GCT>GTT | A>V | phosphotransferase      | nonsyn |
| Mf 93 | NC_006055:662017 | C>A | EX | TCT>TAT | S>Y | polypeptide             | nonsyn |
| Mf 26 | NC_006055:663656 | C>A | EX | TCT>TAT | S>Y | metallo-beta            | nonsyn |
| Mf 12 | NC_006055:663721 | G>T | EX | GGT>TGT | G>C | metallo-beta            | nonsyn |
| Mf 99 | NC_006055:667602 | C>T | EX | GAA>AAA | E>K | hypothetical            | nonsyn |
| Mf 76 | NC_006055:668351 | G>T | EX | TCA>TAA | S>* | hypothetical            | nonsyn |
| Mf 99 | NC_006055:669668 | C>A | EX | TCA>TAA | S>* | hypothetical            | nonsyn |
| Mf 26 | NC_006055:670788 | C>T | IG |         |     |                         |        |
| Mf 23 | NC_006055:672603 | C>A | EX | GAT>TAT | D>Y | phosphoglycerate        | nonsyn |
| Mf 90 | NC_006055:679986 | T>C | EX | AAC>AGC | N>S | DNA                     | nonsyn |
| Mf 76 | NC_006055:684844 | C>A | EX | AGT>ATT | S>I | chromosome              | nonsyn |
| Mf 85 | NC_006055:690508 | G>A | EX | GTT>ATT | V>I | fatty                   | nonsyn |
| Mf 50 | NC_006055:690969 | G>C | EX | GAT>CAT | D>H | fatty                   | nonsyn |
| Mf 68 | NC_006055:691383 | G>A | EX | GAA>AAA | E>K | fatty                   | nonsyn |
| Mf 83 | NC_006055:691534 | G>C | EX | AGA>ACA | R>T | fatty                   | nonsyn |
| Mf 11 | NC_006055:691708 | T>C | IG |         |     |                         |        |
| Mf 19 | NC_006055:692933 | G>C | EX | ACA>AGA | T>R | hypothetical            | nonsyn |
| Mf 14 | NC_006055:695941 | C>T | EX | GGA>AGA | G>R | DNA-directed            | nonsyn |
| Mf 93 | NC_006055:698824 | C>T | EX | GTT>ATT | V>I | DNA-directed            | nonsyn |
| Mf 65 | NC_006055:699544 | C>T | EX | GGA>AGA | G>R | DNA-directed            | nonsyn |
| Mf 26 | NC_006055:700578 | T>C | EX | AAC>AGC | N>S | DNA-directed            | nonsyn |
| Mf 90 | NC_006055:700618 | C>G | EX | GTT>CTT | V>L | DNA-directed            | nonsyn |
| Mf 50 | NC_006055:700747 | G>T | EX | CCT>ACT | P>T | DNA-directed            | nonsyn |
| Mf 23 | NC_006055:701907 | C>T | EX | GGA>GAA | G>E | DNA-directed            | nonsyn |
| Mf 23 | NC_006055:703407 | G>A | EX | CAA>TAA | Q>* | hypothetical            | nonsyn |
| Mf 99 | NC_006055:705464 | G>T | IG |         |     |                         |        |
| Mf 55 | NC_006055:705838 | G>T | IG |         |     |                         |        |
| Mf 58 | NC_006055:707246 | C>T | EX | GTA>ATA | V>I | ABC                     | nonsyn |
| Mf 23 | NC_006055:708334 | G>A | EX | ACA>ATA | T>I | ABC                     | nonsyn |

|       |                  |     |    |         |     |                              |        |
|-------|------------------|-----|----|---------|-----|------------------------------|--------|
| Mf 6  | NC_006055:712338 | T>C | EX | AAC>AGC | N>S | 50S                          | nonsyn |
| Mf 76 | NC_006055:712955 | G>A | EX | GCT>GTT | A>V | 50S                          | nonsyn |
| Mf 26 | NC_006055:713653 | C>A | IG |         |     |                              |        |
| Mf 41 | NC_006055:714052 | T>C | EX | GTG>GCG | V>A | hypothetical                 | nonsyn |
| Mf 59 | NC_006055:714565 | G>A | EX | GGG>GAG | G>E | hypothetical                 | nonsyn |
| Mf 47 | NC_006055:715274 | G>T | EX | CCA>CAA | P>Q | hypothetical                 | nonsyn |
| Mf 42 | NC_006055:720375 | G>A | EX | TCA>TTA | S>L | beta-glucosidase             | nonsyn |
| Mf 59 | NC_006055:720594 | G>A | EX | TCA>TTA | S>L | beta-glucosidase             | nonsyn |
| Mf 68 | NC_006055:721662 | T>C | EX | ATT>GTT | I>V | transcriptional              | nonsyn |
| Mf 19 | NC_006055:723109 | C>T | EX | GTT>ATT | V>I | 6-phospho-beta-glucosidase   | nonsyn |
| Mf 62 | NC_006055:723466 | C>G | EX | GTT>CTT | V>L | 6-phospho-beta-glucosidase   | nonsyn |
| Mf 65 | NC_006055:724610 | G>A | EX | ACA>ATA | T>I | transcriptional              | nonsyn |
| Mf 19 | NC_006055:727128 | C>A | EX | GGG>GGT | G>G | substrate                    | syn    |
| Mf 26 | NC_006055:727328 | C>T | EX | GTG>ATG | V>M | substrate                    | nonsyn |
| Mf 58 | NC_006055:728007 | G>A | EX | CCA>CTA | P>L | elongation                   | nonsyn |
| Mf 99 | NC_006055:731438 | G>A | EX | AAC>AAT | N>N | 30S                          | syn    |
| Mf 67 | NC_006055:732133 | C>T | EX | GCG>GCA | A>A | 30S                          | syn    |
| Mf 58 | NC_006055:733804 | G>A | EX | CCA>CTA | P>L | cardiolipin                  | nonsyn |
| Mf 11 | NC_006055:736487 | C>A | EX | GAA>TAA | E>* | hypothetical                 | nonsyn |
| Mf 83 | NC_006055:738077 | G>A | EX | CTT>TTT | L>F | polypeptide                  | nonsyn |
| Mf 58 | NC_006055:738229 | G>A | EX | TCA>TTA | S>L | polypeptide                  | nonsyn |
| Mf 58 | NC_006055:739931 | C>T | EX | GCC>ACC | A>T | peptide                      | nonsyn |
| Mf 49 | NC_006055:744513 | G>T | IG |         |     |                              |        |
| Mf 85 | NC_006055:747858 | C>T | EX | GCG>GCA | A>A | ribokinase                   | syn    |
| Mf 76 | NC_006055:749091 | C>T | EX | GAT>AAT | D>N | PTS                          | nonsyn |
| Mf 23 | NC_006055:749659 | T>C | IG |         |     |                              |        |
| Mf 85 | NC_006055:751595 | G>T | EX | GCT>GAT | A>D | multidrug                    | nonsyn |
| Mf 62 | NC_006055:751842 | G>A | EX | CAA>TAA | Q>* | multidrug                    | nonsyn |
| Mf 65 | NC_006055:752332 | C>G | IG |         |     |                              |        |
| Mf 93 | NC_006055:755692 | C>T | EX | ATG>ATA | M>I | HD                           | nonsyn |
| Mf 6  | NC_006055:758000 | C>T | EX | GTT>ATT | V>I | sodium-glutamate             | nonsyn |
| Mf 99 | NC_006055:759951 | G>T | EX | AAC>AAA | N>K | NADH                         | nonsyn |
| Mf 85 | NC_006055:760327 | G>A | EX | ACA>ATA | T>I | NADH                         | nonsyn |
| Mf 58 | NC_006055:761490 | G>A | EX | GGA>AGA | G>R | DNA                          | nonsyn |
| Mf 55 | NC_006055:764884 | C>A | EX | GAT>TAT | D>Y | hypothetical                 | nonsyn |
| Mf 50 | NC_006055:769966 | C>T | EX | GTT>ATT | V>I | phosphatidylglycerophosphate | nonsyn |
| Mf 58 | NC_006055:770689 | G>A | EX | TCA>TTA | S>L | putrescine/ornithine         | nonsyn |
| Mf 62 | NC_006055:771271 | G>A | EX | ACT>ATT | T>I | putrescine/ornithine         | nonsyn |
| Mf 65 | NC_006055:771571 | C>T | EX | GGT>GAT | G>D | putrescine/ornithine         | nonsyn |
| Mf 50 | NC_006055:772078 | G>A | EX | CTT>TTT | L>F | purine-nucleoside            | nonsyn |
| Mf 55 | NC_006055:772909 | C>T | EX | GGT>GAT | G>D | ribose                       | nonsyn |
| Mf 14 | NC_006055:774218 | G>A | EX | ACA>ATA | T>I | ribose                       | nonsyn |
| Mf 59 | NC_006055:774359 | C>T | EX | GGA>GAA | G>E | ribose                       | nonsyn |
| Mf 14 | NC_006055:776162 | G>A | EX | ACA>ATA | T>I | ribose                       | nonsyn |
| Mf 19 | NC_006055:777359 | G>C | EX | CCA>CGA | P>R | xylose                       | nonsyn |
| Mf 68 | NC_006055:778817 | G>A | EX | GCT>GTT | A>V | DNA-binding                  | nonsyn |
| Mf 68 | NC_006055:778837 | C>T | EX | GCG>GCA | A>A | DNA-binding                  | syn    |
| Mf 68 | NC_006055:778838 | G>A | EX | GCG>GTG | A>V | DNA-binding                  | nonsyn |
| Mf 6  | NC_006055:779199 | C>A | EX | GCA>TCA | A>S | DNA-binding                  | nonsyn |
| Mf 56 | NC_006055:779820 | G>T | EX | ACT>AAT | T>N | tRNA                         | nonsyn |
| Mf 93 | NC_006055:782021 | C>A | EX | GCT>TCT | A>S | cell                         | nonsyn |
| Mf 50 | NC_006055:782380 | C>G | EX | GGT>GCT | G>A | cell                         | nonsyn |
| Mf 55 | NC_006055:782440 | G>A | EX | GCA>GTA | A>V | cell                         | nonsyn |
| Mf 12 | NC_006055:785976 | C>T | EX | GTT>ATT | V>I | DNA                          | nonsyn |
| Mf 76 | NC_006055:787942 | T>C | EX | GAA>GGA | E>G | DNA                          | nonsyn |
| Mf 55 | NC_006055:790847 | G>T | EX | CAA>AAA | Q>K | HAD-superfamily              | nonsyn |
| Mf 58 | NC_006055:791129 | C>T | IG |         |     |                              |        |
| Mf 41 | NC_006055:791249 | G>T | EX | CGT>AGT | R>S | inner                        | nonsyn |
| Mf 62 | NC_006055:791908 | G>A | EX | ACA>ATA | T>I | inner                        | nonsyn |

|       |                  |     |    |         |     |                                        |  |        |
|-------|------------------|-----|----|---------|-----|----------------------------------------|--|--------|
| Se 70 | NC_005003:1464   | G>A | IG |         |     |                                        |  |        |
| Se 66 | NC_005008:1544   | G>A | IG |         |     |                                        |  |        |
| Se 62 | NC_005004:1706   | C>A | EX | CTT>ATT | L>I | hypothetical                           |  | nonsyn |
| Se 2  | NC_005008:3500   | T>C | EX | AGT>AGC | S>S | RepC                                   |  | syn    |
| Se 39 | NC_005007:4079   | C>A | EX | GCG>GAG | A>E | RLX                                    |  | nonsyn |
| Se 39 | NC_005003:5939   | G>A | IG |         |     |                                        |  |        |
| Se 75 | NC_005004:10466  | T>G | IG |         |     |                                        |  |        |
| Se 38 | NC_004461:13129  | A>G | IG |         |     |                                        |  |        |
| Se 75 | NC_004461:14691  | C>T | IG |         |     |                                        |  |        |
| Se 67 | NC_004461:17081  | C>A | EX | CTG>ATG | L>M | homoserine-o-acetyltransferase         |  | nonsyn |
| Se 11 | NC_005004:17598  | G>T | IG |         |     |                                        |  |        |
| Se 3  | NC_004461:21923  | A>T | EX | TCA>TCT | S>S | replicative                            |  | syn    |
| Se 38 | NC_004461:34294  | G>A | EX | GGG>GGA | G>G | teichoic                               |  | syn    |
| Se 13 | NC_004461:39377  | A>T | IG |         |     |                                        |  |        |
| Se 12 | NC_004461:40860  | A>T | EX | AAA>ATA | K>I | penicillin                             |  | nonsyn |
| Se 12 | NC_004461:59880  | A>G | EX | ATA>ACA | I>T | cassette                               |  | nonsyn |
| Se 66 | NC_004461:60149  | G>A | EX | TAC>TAT | Y>Y | cassette                               |  | syn    |
| Se 70 | NC_004461:69607  | A>T | EX | GAT>GTT | D>V | hypothetical                           |  | nonsyn |
| Se 59 | NC_004461:70211  | G>A | EX | GTT>ATT | V>I | hypothetical                           |  | nonsyn |
| Se 63 | NC_004461:82427  | T>G | EX | GTC>GGC | V>G | regulatory                             |  | nonsyn |
| Se 59 | NC_004461:86584  | T>G | EX | ACT>ACG | T>T | dihydrolipoamide                       |  | syn    |
| Se 12 | NC_004461:108640 | T>G | EX | GAA>GCA | E>A | pyridoxal-deC                          |  | nonsyn |
| Se 75 | NC_004461:120131 | C>T | IG |         |     |                                        |  |        |
| Se 11 | NC_004461:123802 | G>T | EX | GAA>TAA | E>* | hypothetical                           |  | nonsyn |
| Se 2  | NC_004461:132566 | G>A | IG |         |     |                                        |  |        |
| Se 62 | NC_004461:170678 | G>A | EX | GGA>AGA | G>R | adenosylmethionine-8-amino-7-oxononanc |  | nonsyn |
| Se 63 | NC_004461:182083 | G>T | EX | GCT>TCT | A>S | Zn-binding                             |  | nonsyn |
| Se 4  | NC_004461:184153 | C>T | IG |         |     |                                        |  |        |
| Se 34 | NC_004461:184980 | A>T | EX | CAA>CAT | Q>H | NADH-dependent                         |  | nonsyn |
| Se 7  | NC_004461:188114 | G>A | EX | GGT>AGT | G>S | transmembrane                          |  | nonsyn |
| Se 2  | NC_004461:201039 | G>T | EX | AGT>ATT | S>I | ABC                                    |  | nonsyn |
| Se 7  | NC_004461:204655 | C>A | EX | GCT>GAT | A>D | formate                                |  | nonsyn |
| Se 69 | NC_004461:207022 | C>A | EX | CGC>CTC | R>L | succinyl-diaminopimelate               |  | nonsyn |
| Se 10 | NC_004461:214647 | A>G | EX | TTA>TTG | L>L | glycine                                |  | syn    |
| Se 10 | NC_004461:217646 | A>C | EX | TTC>GTC | F>V | hypothetical                           |  | nonsyn |
| Se 70 | NC_004461:224256 | A>G | IG |         |     |                                        |  |        |
| Se 2  | NC_004461:228462 | G>T | EX | GGC>GGA | G>G | multidrug                              |  | syn    |
| Se 63 | NC_004461:231309 | T>G | EX | TTC>GTC | F>V | multidrug                              |  | nonsyn |
| Se 69 | NC_004461:236135 | C>T | EX | GCT>GTT | A>V | surfactin                              |  | nonsyn |
| Se 3  | NC_004461:236986 | T>A | EX | TAT>AAT | Y>N | surfactin                              |  | nonsyn |
| Se 12 | NC_004461:255006 | G>T | EX | GGG>TGG | G>W | branched-chain                         |  | nonsyn |
| Se 38 | NC_004461:257948 | C>T | EX | TCC>TCT | S>S | hypothetical                           |  | syn    |
| Se 50 | NC_004461:258275 | T>C | IG |         |     |                                        |  |        |
| Se 59 | NC_004461:265982 | C>T | EX | GGT>AGT | G>S | malate:quinone                         |  | nonsyn |
| Se 62 | NC_004461:281215 | T>A | IG |         |     |                                        |  |        |
| Se 59 | NC_004461:295465 | C>T | EX | CAT>TAT | H>Y | tRNA/rRNA                              |  | nonsyn |
| Se 2  | NC_004461:299847 | G>T | EX | CGT>CTT | R>L | 50S                                    |  | nonsyn |
| Se 10 | NC_004461:301563 | A>G | IG |         |     |                                        |  |        |
| Se 13 | NC_004461:333412 | C>T | EX | CAA>TAA | Q>* | Ser-Asp                                |  | nonsyn |
| Se 4  | NC_004461:334590 | C>T | EX | GAC>GAT | D>D | Ser-Asp                                |  | syn    |
| Se 4  | NC_004461:334629 | C>A | EX | TCC>TCA | S>S | Ser-Asp                                |  | syn    |
| Se 4  | NC_004461:334632 | T>C | EX | GAT>GAC | D>D | Ser-Asp                                |  | syn    |
| Se 4  | NC_004461:334641 | G>A | EX | TCG>TCA | S>S | Ser-Asp                                |  | syn    |
| Se 3  | NC_004461:337670 | C>A | EX | CAC>CAA | H>Q | hypothetical                           |  | nonsyn |
| Se 38 | NC_004461:352812 | C>T | EX | GGC>GGT | G>G | cationic                               |  | syn    |
| Se 75 | NC_004461:375658 | A>T | EX | AAA>AAT | K>N | hypothetical                           |  | nonsyn |
| Se 75 | NC_004461:380105 | G>T | EX | GCG>GCT | A>A | iron-binding                           |  | syn    |
| Se 3  | NC_004461:388607 | G>C | EX | TCT>TGT | S>C | hypothetical                           |  | nonsyn |
| Se 38 | NC_004461:392574 | G>C | EX | CGT>CCT | R>P | monovalent                             |  | nonsyn |

|       |                   |     |    |         |     |                              |        |
|-------|-------------------|-----|----|---------|-----|------------------------------|--------|
| Se 13 | NC_004461:393788  | C>T | EX | CAT>TAT | H>Y | monovalent                   | nonsyn |
| Se 75 | NC_004461:433604  | G>T | IG |         |     |                              |        |
| Se 13 | NC_004461:447598  | C>A | EX | GGT>GTT | G>V | undecaprenyl                 | nonsyn |
| Se 38 | NC_004461:449335  | C>A | EX | CCT>CAT | P>H | hypothetical                 | nonsyn |
| Se 65 | NC_004461:449548  | G>C | EX | GGT>GCT | G>A | hypothetical                 | nonsyn |
| Se 4  | NC_004461:462739  | A>T | EX | AAA>AAT | K>N | transcription                | nonsyn |
| Se 34 | NC_004461:489682  | G>A | EX | GAT>AAT | D>N | ABC                          | nonsyn |
| Se 69 | NC_004461:494579  | A>T | IG |         |     |                              |        |
| Se 34 | NC_004461:495944  | C>A | EX | GCT>GAT | A>D | hypothetical                 | nonsyn |
| Se 10 | NC_004461:497763  | C>A | EX | GAC>TAC | D>Y | bifunctional                 | nonsyn |
| Se 75 | NC_004461:501808  | A>T | EX | TTA>TAA | L>* | di-tripeptide                | nonsyn |
| Se 70 | NC_004461:502669  | T>A | IG |         |     |                              |        |
| Se 7  | NC_004461:514279  | C>T | EX | GCA>ACA | A>T | hypothetical                 | nonsyn |
| Se 2  | NC_004461:514708  | C>T | IG |         |     |                              |        |
| Se 75 | NC_004461:519140  | C>T | EX | GGT>GAT | G>D | hypothetical                 | nonsyn |
| Se 67 | NC_004461:523198  | A>C | EX | GTC>GGC | V>G | hypothetical                 | nonsyn |
| Se 62 | NC_004461:528592  | T>G | EX | TTT>TTG | F>L | preprotein                   | nonsyn |
| Se 66 | NC_004461:543285  | C>T | EX | CTT>TTT | L>F | hypothetical                 | nonsyn |
| Se 8  | NC_004461:545580  | C>T | EX | GCA>GTA | A>V | hypothetical                 | nonsyn |
| Se 7  | NC_004461:554343  | A>G | EX | CAC>CGC | H>R | glyceraldehyde-3-phosphate   | nonsyn |
| Se 12 | NC_004461:572238  | A>G | EX | TTA>CTA | L>L | hypothetical                 | syn    |
| Se 39 | NC_004461:579262  | C>A | EX | GAA>TAA | E>* | hypothetical                 | nonsyn |
| Se 7  | NC_004461:580374  | T>A | IG |         |     |                              |        |
| Se 59 | NC_004461:580448  | G>C | IG |         |     |                              |        |
| Se 34 | NC_004461:593568  | T>A | EX | GGT>GGA | G>G | ABC                          | syn    |
| Se 34 | NC_004461:608615  | C>G | IG |         |     |                              |        |
| Se 59 | NC_004461:610535  | C>G | EX | CTT>GTT | L>V | DltB                         | nonsyn |
| Se 70 | NC_004461:627607  | C>T | EX | GTG>ATG | V>M | monovalent                   | nonsyn |
| Se 66 | NC_004461:645498  | G>A | EX | GGT>AGT | G>S | hypothetical                 | nonsyn |
| Se 59 | NC_004461:660859  | G>A | EX | ATG>ATA | M>I | hypothetical                 | nonsyn |
| Se 4  | NC_004461:668674  | T>A | EX | GTT>GTA | V>V | 3-oxoacyl-ACP                | syn    |
| Se 39 | NC_004461:687790  | T>A | EX | GAT>GAA | D>E | inorganic                    | nonsyn |
| Se 4  | NC_004461:689530  | G>A | EX | GAT>AAT | D>N | Mg2+                         | nonsyn |
| Se 13 | NC_004461:700673  | C>A | IG |         |     |                              |        |
| Se 62 | NC_004461:706991  | A>T | EX | CCT>CCA | P>P | diacylglycerol               | syn    |
| Se 59 | NC_004461:710039  | A>C | EX | AAA>ACA | K>T | peptide                      | nonsyn |
| Se 38 | NC_004461:719747  | A>G | IG |         |     |                              |        |
| Se 50 | NC_004461:725555  | T>G | IG |         |     |                              |        |
| Se 50 | NC_004461:752293  | T>G | EX | TGT>GGT | C>G | phosphoribosylaminoimidazole | nonsyn |
| Se 2  | NC_004461:759880  | G>T | EX | GAC>TAC | D>Y | phosphoribosylglycinamide    | nonsyn |
| Se 13 | NC_004461:763866  | C>T | EX | GAA>AAA | E>K | cation                       | nonsyn |
| Se 11 | NC_004461:775282  | T>A | EX | ATT>ATA | I>I | cytochrome                   | syn    |
| Se 70 | NC_004461:796310  | T>A | EX | GCA>GCT | A>A | manganese                    | syn    |
| Se 7  | NC_004461:817228  | C>T | EX | ATG>ATA | M>I | hypothetical                 | nonsyn |
| Se 11 | NC_004461:818705  | C>T | EX | CAT>TAT | H>Y | hypothetical                 | nonsyn |
| Se 39 | NC_004461:837123  | G>A | EX | GCA>ACA | A>T | succinate                    | nonsyn |
| Se 50 | NC_004461:842238  | A>C | IG |         |     |                              |        |
| Se 69 | NC_004461:855203  | A>T | EX | AGT>TGT | S>C | cell                         | nonsyn |
| Se 3  | NC_004461:891218  | G>T | EX | GTC>TTC | V>F | PP2C                         | nonsyn |
| Se 67 | NC_004461:894721  | C>T | EX | ACA>ATA | T>I | ribulose-phosphate           | nonsyn |
| Se 70 | NC_004461:908615  | G>T | EX | CCG>CCT | P>P | chromosome                   | syn    |
| Se 12 | NC_004461:912689  | G>A | IG |         |     |                              |        |
| Se 39 | NC_004461:931541  | C>T | EX | GCT>GTT | A>V | ATP-dependent                | nonsyn |
| Se 75 | NC_004461:933004  | A>T | EX | AAA>ATA | K>I | transcriptional              | nonsyn |
| Se 67 | NC_004461:934727  | A>T | IG |         |     |                              |        |
| Se 75 | NC_004461:941768  | G>A | EX | GGC>AGC | G>S | prolyl-tRNA                  | nonsyn |
| Se 12 | NC_004461:978277  | A>G | EX | AAT>AGT | N>S | (dimethylallyl)adenosine     | nonsyn |
| Se 39 | NC_004461:1023530 | G>T | IG |         |     |                              |        |
| Se 2  | NC_004461:1073788 | T>G | EX | CAA>CAC | Q>H | oligopeptide                 | nonsyn |

|       |                   |     |    |         |     |                                       |        |
|-------|-------------------|-----|----|---------|-----|---------------------------------------|--------|
| Se 59 | NC_004461:1073992 | C>T | EX | TGG>TGA | W>* | oligopeptide                          | nonsyn |
| Se 59 | NC_004461:1077752 | G>A | EX | GGC>GAC | G>D | oligoendopeptidase                    | nonsyn |
| Se 50 | NC_004461:1095693 | T>G | EX | TAT>TCT | Y>S | ABC                                   | nonsyn |
| Se 7  | NC_004461:1111089 | G>T | IG |         |     |                                       |        |
| Se 10 | NC_004461:1121744 | G>T | IG |         |     |                                       |        |
| Se 4  | NC_004461:1123368 | T>A | EX | GGA>GGT | G>G | undecaprenyldiphospho-muramoylpentape | syn    |
| Se 3  | NC_004461:1129122 | C>T | EX | GAG>AAG | E>K | dihydrofolate                         | nonsyn |
| Se 10 | NC_004461:1134366 | C>A | EX | GCA>GAA | A>E | hypothetical                          | nonsyn |
| Se 75 | NC_004461:1140329 | C>A | EX | CTG>CTT | L>L | ebhA                                  | syn    |
| Se 8  | NC_004461:1144884 | G>A | EX | ACT>ATT | T>I | ebhA                                  | nonsyn |
| Se 50 | NC_004461:1158627 | G>T | EX | ACA>AAA | T>K | ebhA                                  | nonsyn |
| Se 62 | NC_004461:1165805 | G>A | EX | GCC>GCT | A>A | hypothetical                          | syn    |
| Se 65 | NC_004461:1167586 | T>A | EX | CAA>CTA | Q>L | hypothetical                          | nonsyn |
| Se 11 | NC_004461:1170320 | G>T | EX | CAA>AAA | Q>K | hypothetical                          | nonsyn |
| Se 66 | NC_004461:1182805 | A>G | EX | TCA>CCA | S>P | dinG                                  | nonsyn |
| Se 69 | NC_004461:1193140 | A>T | EX | CTT>CAT | L>H | 3-dehydroquinone                      | nonsyn |
| Se 75 | NC_004461:1195203 | G>T | EX | AGC>AGA | S>R | nucleoside                            | nonsyn |
| Se 8  | NC_004461:1215453 | C>T | EX | GCT>ACT | A>T | hypothetical                          | nonsyn |
| Se 13 | NC_004461:1223560 | G>A | EX | AGT>AAT | S>N | glucose-6-phosphate                   | nonsyn |
| Se 62 | NC_004461:1224078 | G>A | EX | GAA>AAA | E>K | glucose-6-phosphate                   | nonsyn |
| Se 69 | NC_004461:1235825 | C>T | EX | ATG>ATA | M>I | branched-chain                        | nonsyn |
| Se 62 | NC_004461:1243467 | G>T | EX | GCG>GAG | A>E | hypothetical                          | nonsyn |
| Se 39 | NC_004461:1250957 | C>T | EX | AAG>AAA | K>K | Xaa-Pro                               | syn    |
| Se 3  | NC_004461:1254397 | G>T | IG |         |     |                                       |        |
| Se 59 | NC_004461:1256500 | C>T | EX | GAG>AAG | E>K | glycine                               | nonsyn |
| Se 3  | NC_004461:1256590 | C>A | EX | GCT>TCT | A>S | glycine                               | nonsyn |
| Se 10 | NC_004461:1262915 | A>T | EX | TTA>ATA | L>I | late                                  | nonsyn |
| Se 62 | NC_004461:1264324 | A>T | EX | GTT>GAT | V>D | glucokinase                           | nonsyn |
| Se 50 | NC_004461:1264683 | G>T | EX | GCC>GCA | A>A | glucokinase                           | syn    |
| Se 11 | NC_004461:1267362 | G>T | IG |         |     |                                       |        |
| Se 75 | NC_004461:1268447 | G>A | EX | GCA>GTA | A>V | penicillin-binding                    | nonsyn |
| Se 7  | NC_004461:1284691 | T>C | EX | GAT>GGT | D>G | DNA                                   | nonsyn |
| Se 10 | NC_004461:1286588 | C>T | EX | GCG>GCA | A>A | diacylglycerol                        | syn    |
| Se 34 | NC_004461:1291649 | C>A | IG |         |     |                                       |        |
| Se 75 | NC_004461:1292049 | G>A | IG |         |     |                                       |        |
| Se 69 | NC_004461:1302144 | T>A | EX | AAA>ATA | K>I | GTP-binding                           | nonsyn |
| Se 70 | NC_004461:1309714 | T>A | EX | GAG>GTG | E>V | hypothetical                          | nonsyn |
| Se 2  | NC_004461:1315145 | C>A | EX | GAA>TAA | E>* | hypothetical                          | nonsyn |
| Se 11 | NC_004461:1328303 | C>T | EX | GTT>ATT | V>I | alanyl-tRNA                           | nonsyn |
| Se 10 | NC_004461:1334078 | T>C | EX | GAT>GGT | D>G | iron-sulfur                           | nonsyn |
| Se 50 | NC_004461:1338625 | G>A | IG |         |     |                                       |        |
| Se 75 | NC_004461:1342547 | T>A | EX | ACA>TCA | T>S | histidyl-tRNA                         | nonsyn |
| Se 70 | NC_004461:1353283 | A>C | EX | TCT>TCG | S>S | bifunctional                          | syn    |
| Se 59 | NC_004461:1354941 | G>T | EX | TTC>TTA | F>L | queuine                               | nonsyn |
| Se 75 | NC_004461:1359215 | C>G | EX | GAG>CAG | E>Q | GTPase                                | nonsyn |
| Se 75 | NC_004461:1363245 | C>G | EX | GAA>CAA | E>Q | hypothetical                          | nonsyn |
| Se 7  | NC_004461:1369464 | C>A | IG |         |     |                                       |        |
| Se 67 | NC_004461:1384791 | G>T | EX | ACT>AAT | T>N | translation                           | nonsyn |
| Se 59 | NC_004461:1388434 | G>A | EX | GAC>GAT | D>D | threonyl-tRNA                         | syn    |
| Se 62 | NC_004461:1412544 | C>T | EX | GAC>AAC | D>N | DNA                                   | nonsyn |
| Se 7  | NC_004461:1434516 | A>T | EX | TTA>ATA | L>I | hypothetical                          | nonsyn |
| Se 75 | NC_004461:1453525 | C>A | EX | CAG>CAT | Q>H | DNA                                   | nonsyn |
| Se 75 | NC_004461:1475946 | G>A | EX | GCA>GTA | A>V | FmtB                                  | nonsyn |
| Se 7  | NC_004461:1498044 | G>T | EX | GAT>TAT | D>Y | hypothetical                          | nonsyn |
| Se 59 | NC_004461:1499992 | A>C | IG |         |     |                                       |        |
| Se 38 | NC_004461:1500452 | G>T | EX | AGC>ATC | S>I | hypothetical                          | nonsyn |
| Se 13 | NC_004461:1510172 | G>A | EX | GAT>AAT | D>N | phosphoenolpyruvate                   | nonsyn |
| Se 11 | NC_004461:1532097 | G>T | EX | GCA>GAA | A>E | hypothetical                          | nonsyn |
| Se 59 | NC_004461:1540678 | T>C | EX | GAT>GGT | D>G | hypothetical                          | nonsyn |

|       |                   |     |    |         |     |                        |  |        |
|-------|-------------------|-----|----|---------|-----|------------------------|--|--------|
| Se 69 | NC_004461:1558656 | C>A | IG |         |     |                        |  |        |
| Se 10 | NC_004461:1558780 | G>T | IG |         |     |                        |  |        |
| Se 2  | NC_004461:1565389 | G>T | IG |         |     |                        |  |        |
| Se 62 | NC_004461:1592599 | G>A | IG |         |     |                        |  |        |
| Se 67 | NC_004461:1594035 | C>G | IG |         |     |                        |  |        |
| Se 7  | NC_004461:1609536 | G>T | EX | GTA>TTA | V>L | hypothetical           |  | nonsyn |
| Se 66 | NC_004461:1612439 | A>T | EX | CTC>CAC | L>H | teichoic               |  | nonsyn |
| Se 12 | NC_004461:1624187 | C>A | EX | GCT>TCT | A>S | hypothetical           |  | nonsyn |
| Se 2  | NC_004461:1634967 | C>A | EX | GGG>GGT | G>G | RNA                    |  | syn    |
| Se 4  | NC_004461:1636776 | T>G | EX | AGA>AGC | R>S | aspartyl/glutamyl-tRNA |  | nonsyn |
| Se 13 | NC_004461:1646298 | G>A | EX | GCT>GTT | A>V | ATP-depentend          |  | nonsyn |
| Se 3  | NC_004461:1647093 | C>T | EX | GTA>ATA | V>I | geranylgeranylglyceryl |  | nonsyn |
| Se 66 | NC_004461:1656277 | C>A | EX | GCT>TCT | A>S | hypothetical           |  | nonsyn |
| Se 62 | NC_004461:1661883 | G>A | EX | CCG>CCA | P>P | hypothetical           |  | syn    |
| Se 62 | NC_004461:1661886 | T>C | EX | TTT>TTC | F>F | hypothetical           |  | syn    |
| Se 62 | NC_004461:1661887 | A>G | EX | ATT>GTT | I>V | hypothetical           |  | nonsyn |
| Se 7  | NC_004461:1663574 | T>C | EX | GGA>GGG | G>G | bla                    |  | syn    |
| Se 13 | NC_004461:1686685 | A>T | EX | TCA>ACA | S>T | Ser-Asp                |  | nonsyn |
| Se 10 | NC_004461:1693269 | A>G | EX | TTA>CTA | L>L | fructokinase           |  | syn    |
| Se 50 | NC_004461:1695354 | A>T | EX | TTG>TAG | L>* | sucrose                |  | nonsyn |
| Se 70 | NC_004461:1718218 | C>A | EX | CAG>AAG | Q>K | threonine              |  | nonsyn |
| Se 70 | NC_004461:1729555 | G>T | EX | CAA>AAA | Q>K | sigmaB                 |  | nonsyn |
| Se 75 | NC_004461:1737319 | C>G | IG |         |     |                        |  |        |
| Se 3  | NC_004461:1743238 | A>G | EX | TAC>TGC | Y>C | cardiolipin            |  | nonsyn |
| Se 75 | NC_004461:1759723 | A>T | EX | TTC>ATC | F>I | ATP                    |  | nonsyn |
| Se 66 | NC_004461:1777105 | G>A | IG |         |     |                        |  |        |
| Se 12 | NC_004461:1781173 | G>T | EX | CGA>AGA | R>R | spermine/spermidine    |  | syn    |
| Se 34 | NC_004461:1784707 | C>A | EX | GAG>GAT | E>D | amidase                |  | nonsyn |
| Se 8  | NC_004461:1785020 | A>G | EX | GTA>GCA | V>A | amidase                |  | nonsyn |
| Se 39 | NC_004461:1796618 | G>A | EX | GGC>GGT | G>G | hypothetical           |  | syn    |
| Se 10 | NC_004461:1805460 | A>T | EX | TTT>TTA | F>L | phosphoglucosamine     |  | nonsyn |
| Se 75 | NC_004461:1812882 | C>G | IG |         |     |                        |  |        |
| Se 4  | NC_004461:1818482 | A>T | EX | TTT>TAT | F>Y | multidrug              |  | nonsyn |
| Se 39 | NC_004461:1833466 | T>C | EX | AAA>GAA | K>E | alkaline               |  | nonsyn |
| Se 12 | NC_004461:1838760 | G>T | IG |         |     |                        |  |        |
| Se 62 | NC_004461:1848340 | A>C | EX | TCA>TCC | S>S | NAD-dependent          |  | syn    |
| Se 59 | NC_004461:1856258 | A>T | EX | GAT>GAA | D>E | adenylate              |  | nonsyn |
| Se 62 | NC_004461:1856778 | A>T | EX | ATG>AAG | M>K | adenylate              |  | nonsyn |
| Se 8  | NC_004461:1857670 | C>T | EX | CAG>CAA | Q>Q | preprotein             |  | syn    |
| Se 10 | NC_004461:1862923 | C>T | EX | GGC>GAC | G>D | 50S                    |  | nonsyn |
| Se 69 | NC_004461:1865507 | C>A | EX | GCG>GCT | A>A | 50S                    |  | syn    |
| Se 66 | NC_004461:1865708 | T>C | EX | GTA>GTG | V>V | 50S                    |  | syn    |
| Se 13 | NC_004461:1884581 | C>T | IG |         |     |                        |  |        |
| Se 4  | NC_004461:1900254 | A>T | EX | ACA>TCA | T>S | urease                 |  | nonsyn |
| Se 11 | NC_004461:1900328 | T>C | EX | CGT>CGC | R>R | urease                 |  | syn    |
| Se 4  | NC_004461:1904706 | A>G | EX | ATT>GTT | I>V | urease                 |  | nonsyn |
| Se 34 | NC_004461:1917551 | A>T | EX | TTT>TTA | F>L | hypothetical           |  | nonsyn |
| Se 38 | NC_004461:1924227 | A>T | EX | AAT>TAT | N>Y | hypothetical           |  | nonsyn |
| Se 69 | NC_004461:1926714 | C>T | EX | GGC>GGT | G>G | PTS                    |  | syn    |
| Se 38 | NC_004461:1929542 | G>T | EX | GCT>GAT | A>D | transport              |  | nonsyn |
| Se 8  | NC_004461:1930756 | C>T | IG |         |     |                        |  |        |
| Se 59 | NC_004461:1938335 | G>T | EX | GGC>GGA | G>G | hypothetical           |  | syn    |
| Se 70 | NC_004461:1974800 | C>T | EX | CGT>TGT | R>C | two                    |  | nonsyn |
| Se 50 | NC_004461:1984557 | T>C | EX | AAT>GAT | N>D | teichoic               |  | nonsyn |
| Se 8  | NC_004461:1987990 | A>T | IG |         |     |                        |  |        |
| Se 70 | NC_004461:2000368 | T>C | EX | AGC>GGC | S>G | hypothetical           |  | nonsyn |
| Se 4  | NC_004461:2011364 | G>A | EX | CCA>TCA | P>S | respiratory            |  | nonsyn |
| Se 7  | NC_004461:2014683 | C>T | EX | CGT>CAT | R>H | nitrite                |  | nonsyn |
| Se 66 | NC_004461:2014897 | A>T | EX | TAT>AAT | Y>N | nitrite                |  | nonsyn |

|       |                     |     |    |         |     |                          |        |
|-------|---------------------|-----|----|---------|-----|--------------------------|--------|
| Se 50 | NC_004461:2029797   | A>T | EX | TTA>ATA | L>I | ABC                      | nonsyn |
| Se 7  | NC_004461:2029930   | A>G | IG |         |     |                          |        |
| Se 39 | NC_004461:2033666   | T>A | EX | AAT>ATT | N>I | hypothetical             | nonsyn |
| Se 75 | NC_004461:2037051   | T>G | EX | TTT>TGT | F>C | bicyclomycin             | nonsyn |
| Se 10 | NC_004461:2045532   | G>A | EX | GGA>GAA | G>E | lipoprotein              | nonsyn |
| Se 12 | NC_004461:2057986   | G>A | EX | GGT>AGT | G>S | sorbitol                 | nonsyn |
| Se 3  | NC_004461:2060367   | T>A | EX | TTT>TTA | F>L | amino                    | nonsyn |
| Se 8  | NC_004461:2074414   | C>A | EX | CTC>ATC | L>I | polyphosphate            | nonsyn |
| Se 70 | NC_004461:2094383   | G>A | EX | CAA>TAA | Q>* | hypothetical             | nonsyn |
| Se 59 | NC_004461:2095515   | T>C | EX | GTA>GCA | V>A | hypothetical             | nonsyn |
| Se 12 | NC_004461:2101576   | G>A | IG |         |     |                          |        |
| Se 38 | NC_004461:2119111   | G>T | EX | CAC>AAC | H>N | NAD(P)H-flavin           | nonsyn |
| Se 67 | NC_004461:2138913   | C>A | IG |         |     |                          |        |
| Se 69 | NC_004461:2161041   | C>T | IG |         |     |                          |        |
| Se 75 | NC_004461:2164906   | G>A | EX | GAG>AAG | E>K | copper-transporting      | nonsyn |
| Se 13 | NC_004461:2178128   | A>T | EX | CTT>CAT | L>H | hypothetical             | nonsyn |
| Se 7  | NC_004461:2181155   | T>A | EX | ATA>TTA | I>L | hypothetical             | nonsyn |
| Se 7  | NC_004461:2181488   | A>T | IG |         |     |                          |        |
| Se 62 | NC_004461:2182307   | A>C | EX | GGT>GGG | G>G | TcaA                     | syn    |
| Se 67 | NC_004461:2184047   | T>C | IG |         |     |                          |        |
| Se 63 | NC_004461:2193342   | T>G | IG |         |     |                          |        |
| Se 10 | NC_004461:2197932   | G>A | EX | GCT>GTT | A>V | hypothetical             | nonsyn |
| Se 62 | NC_004461:2203530   | G>T | IG |         |     |                          |        |
| Se 4  | NC_004461:2207856   | G>A | EX | CAA>TAA | Q>* | pyruvate                 | nonsyn |
| Se 39 | NC_004461:2224164   | T>C | EX | ACA>ACG | T>T | anaerobic                | syn    |
| Se 70 | NC_004461:2227104   | G>T | EX | GCA>GAA | A>E | sulfate                  | nonsyn |
| Se 11 | NC_004461:2271633   | G>T | IG |         |     |                          |        |
| Se 59 | NC_004461:2274246   | A>T | IG |         |     |                          |        |
| Se 4  | NC_004461:2274326   | A>T | IG |         |     |                          |        |
| Se 50 | NC_004461:2275555   | C>A | EX | GGT>TGT | G>C | succinyl-diaminopimelate | nonsyn |
| Se 4  | NC_004461:2276592   | G>A | EX | TCG>TCA | S>S | hypothetical             | syn    |
| Se 75 | NC_004461:2277035   | G>A | EX | GGT>GAT | G>D | hypothetical             | nonsyn |
| Se 75 | NC_004461:2277046   | G>T | EX | GTA>TTA | V>L | hypothetical             | nonsyn |
| Se 2  | NC_004461:2279764   | G>A | EX | GGC>GGT | G>G | acetoin                  | syn    |
| Se 34 | NC_004461:2295975   | G>A | EX | CGT>TGT | R>C | hypothetical             | nonsyn |
| Se 70 | NC_004461:2300541   | G>A | EX | CAG>TAG | Q>* | hypothetical             | nonsyn |
| Se 69 | NC_004461:2302285   | G>A | EX | CCT>TCT | P>S | lipopolysaccharide       | nonsyn |
| Se 70 | NC_004461:2307896   | T>C | EX | GAC>GGC | D>G | hypothetical             | nonsyn |
| Se 13 | NC_004461:2309356   | G>A | EX | GCG>GTG | A>V | preprotein               | nonsyn |
| Se 69 | NC_004461:2316667   | C>T | IG |         |     |                          |        |
| Se 34 | NC_004461:2321134   | C>A | IG |         |     |                          |        |
| Se 38 | NC_004461:2332105   | A>C | EX | TTA>TTC | L>F | GntR                     | nonsyn |
| Se 62 | NC_004461:2338126   | G>A | IG |         |     |                          |        |
| Se 2  | NC_004461:2340255   | G>A | EX | CAT>TAT | H>Y | lysyl-tRNA               | nonsyn |
| Se 66 | NC_004461:2340742   | C>A | IG |         |     |                          |        |
| Se 3  | NC_004461:2342964   | C>A | EX | GGC>GTC | G>V | cysteine                 | nonsyn |
| Se 70 | NC_004461:2351050   | C>T | EX | AGT>AAT | S>N | hypothetical             | nonsyn |
| Se 10 | NC_004461:2355344   | G>T | EX | CAA>AAA | Q>K | transcription-repair     | nonsyn |
| Se 50 | NC_004461:2364631   | C>A | EX | GAT>TAT | D>Y | veg                      | nonsyn |
| Se 11 | NC_004461:2376115   | T>C | EX | ATC>GTC | I>V | lysine                   | nonsyn |
| Se 39 | NC_004461:2382242   | A>T | IG |         |     |                          |        |
| Se 10 | NC_004461:2415458   | G>T | EX | GCA>GAA | A>E | hypothetical             | nonsyn |
| Se 10 | NC_004461:2427575   | C>A | IG |         |     |                          |        |
| Se 62 | NC_004461:2429329   | G>T | EX | CCA>ACA | P>T | inositol-monophosphate   | nonsyn |
| Se 66 | NC_004461:2455399   | C>T | EX | CGG>TGG | R>W | bifunctional             | nonsyn |
| Se 62 | NC_004461:2460674   | G>A | EX | GCG>GTG | A>V | acetyl-CoA               | nonsyn |
| Se 7  | NC_004461:2472200   | C>A | EX | TCG>TCT | S>S | Ser-Asp                  | syn    |
| Se 50 | NC_004461:2490267   | G>A | EX | GGA>AGA | G>R | hypothetical             | nonsyn |
| Vc 39 | NZ_AAUT01000042:261 | G>A | EX | CGC>TGC | R>C | fumarate                 | nonsyn |



|       |                     |     |    |         |     |                              |        |
|-------|---------------------|-----|----|---------|-----|------------------------------|--------|
| Vc 47 | NZ_AAUT01000200:393 | G>A | EX | AGC>AGT | S>S | outer                        | syn    |
| Vc 9  | NZ_AAUT01000041:445 | G>A | EX | CCG>CCA | P>P | magnesium                    | syn    |
| Vc 34 | NZ_AAUT01000249:560 | C>G | EX | GGG>GGC | G>G | UDP-glucose                  | syn    |
| Vc 16 | NZ_AAUT01000056:643 | G>C | EX | GGC>GGG | G>G | aspartokinase,               | syn    |
| Vc 23 | NZ_AAUT01000092:103 | C>T | EX | CCT>TCT | P>S | GGDEF                        | nonsyn |
| Vc 31 | NZ_AAUT01000175:104 | C>A | EX | GGC>GGA | G>G | hypothetical                 | syn    |
| Vc 47 | NZ_AAUT01000006:149 | G>A | EX | GTC>ATC | V>I | protein-P-II                 | nonsyn |
| Vc 68 | NZ_AAUT01000029:166 | A>G | EX | AAG>AGG | K>R | GTP                          | nonsyn |
| Vc 39 | NZ_AAUT01000130:167 | T>G | EX | ATC>CTC | I>L | Na+/H+                       | nonsyn |
| Vc 35 | NZ_AAUT01000059:192 | C>G | IG |         |     |                              |        |
| Vc 31 | NZ_AAUT01000117:196 | T>G | EX | GAT>GCT | D>A | glycogen                     | nonsyn |
| Vc 70 | NZ_AAUT01000104:206 | T>G | EX | TCC>GCC | S>A | GGDEF                        | nonsyn |
| Vc 39 | NZ_AAUT01000101:208 | C>A | EX | CCC>CCA | P>P | imidazolonepropionase        | syn    |
| Vc 32 | NZ_AAUT01000050:210 | A>G | EX | GTA>GCA | V>A | 1-deoxyxylulose-5-phosphate  | nonsyn |
| Vc 26 | NZ_AAUT01000090:236 | A>T | EX | ATC>AAC | I>N | sugar                        | nonsyn |
| Vc 33 | NZ_AAUT01000108:244 | G>A | EX | GCC>GTC | A>V | orotidine                    | nonsyn |
| Vc 19 | NZ_AAUT01000087:254 | C>A | IG |         |     |                              |        |
| Vc 1  | NZ_AAUT01000007:274 | C>T | EX | GCG>GTG | A>V | UDP-3-O-3-hydroxymyristoyl   | nonsyn |
| Vc 59 | NZ_AAUT01000032:281 | C>T | EX | GGT>GAT | G>D | rod                          | nonsyn |
| Vc 70 | NZ_AAUT01000032:315 | G>A | EX | TCT>TTT | S>F | rod                          | nonsyn |
| Vc 16 | NZ_AAUT01000019:323 | C>T | EX | ATG>ATA | M>I | hypothetical                 | nonsyn |
| Vc 31 | NZ_AAUT01000032:326 | C>T | EX | GGT>AGT | G>S | rod                          | nonsyn |
| Vc 35 | NZ_AAUT01000125:385 | G>A | EX | GCA>GTA | A>V | adenylosuccinate             | nonsyn |
| Vc 29 | NZ_AAUT01000053:396 | A>C | EX | GAT>GAG | D>E | sensor                       | nonsyn |
| Vc 8  | NZ_AAUT01000085:429 | C>T | EX | GAT>AAT | D>N | exodeoxyribonuclease         | nonsyn |
| Vc 19 | NZ_AAUT01000102:435 | C>T | EX | CCT>CTT | P>L | isocitrate                   | nonsyn |
| Vc 16 | NZ_AAUT01000122:439 | T>A | EX | ATT>ATA | I>I | inner                        | syn    |
| Vc 45 | NZ_AAUT01000092:477 | G>A | EX | CTG>CTA | L>L | hypothetical                 | syn    |
| Vc 33 | NZ_AAUT01000036:517 | C>A | IG |         |     |                              |        |
| Vc 48 | NZ_AAUT01000065:520 | C>A | EX | ACC>ACA | T>T | UDP-glucose                  | syn    |
| Vc 59 | NZ_AAUT01000097:664 | T>G | EX | GAT>GCT | D>A | hypothetical                 | nonsyn |
| Vc 20 | NZ_AAUT01000075:765 | G>A | EX | CCA>CTA | P>L | carbamoyl-phosphate          | nonsyn |
| Vc 26 | NZ_AAUT01000088:770 | C>A | IG |         |     |                              |        |
| Vc 59 | NZ_AAUT01000016:780 | G>A | EX | GTC>ATC | V>I | hypothetical                 | nonsyn |
| Vc 45 | NZ_AAUT01000048:786 | G>A | EX | GGT>AGT | G>S | hypothetical                 | nonsyn |
| Vc 59 | NZ_AAUT01000050:804 | G>A | IG |         |     |                              |        |
| Vc 48 | NZ_AAUT01000029:835 | G>A | EX | CAA>TAA | Q>* | regulator                    | nonsyn |
| Vc 65 | NZ_AAUT01000093:838 | C>A | IG |         |     |                              |        |
| Vc 35 | NZ_AAUT01000068:840 | A>C | EX | GGT>GGG | G>G | spermidine/putrescine        | syn    |
| Vc 30 | NZ_AAUT01000026:853 | T>G | IG |         |     |                              |        |
| Vc 57 | NZ_AAUT01000066:897 | T>G | EX | ATC>CTC | I>L | exopolyphosphatase           | nonsyn |
| Vc 34 | NZ_AAUT01000075:954 | G>T | IG |         |     |                              |        |
| Vc 43 | NZ_AAUT01000041:977 | T>C | EX | ATT>ACT | I>T | fructose-1,6-bisphosphatase  | nonsyn |
| Vc 48 | NZ_AAUT01000018:100 | G>C | EX | GAC>GAG | D>E | multidrug                    | nonsyn |
| Vc 4  | NZ_AAUT01000088:101 | C>T | EX | CCA>TCA | P>S | aspartate                    | nonsyn |
| Vc 11 | NZ_AAUT01000033:103 | C>T | EX | CCC>CTC | P>L | single-stranded-DNA-specific | nonsyn |
| Vc 16 | NZ_AAUT01000064:104 | T>C | EX | CAT>CGT | H>R | hypothetical                 | nonsyn |
| Vc 31 | NZ_AAUT01000059:106 | G>T | EX | ACC>AAC | T>N | hypothetical                 | nonsyn |
| Vc 33 | NZ_AAUT01000080:111 | T>A | EX | TAT>AAT | Y>N | MutT/nudix                   | nonsyn |
| Vc 22 | NZ_AAUT01000058:122 | C>T | IG |         |     |                              |        |
| Vc 5  | NZ_AAUT01000060:124 | T>C | EX | TCC>CCC | S>P | hypothetical                 | nonsyn |
| Vc 31 | NZ_AAUT01000010:130 | T>G | EX | TTT>TTG | F>L | hypothetical                 | nonsyn |
| Vc 48 | NZ_AAUT01000080:135 | A>G | EX | AAC>AGC | N>S | 4-hydroxyphenylpyruvate      | nonsyn |
| Vc 17 | NZ_AAUT01000035:140 | A>G | EX | AGT>GGT | S>G | hypothetical                 | nonsyn |
| Vc 57 | NZ_AAUT01000030:144 | C>T | EX | GTT>ATT | V>I | hypothetical                 | nonsyn |
| Vc 22 | NZ_AAUT01000056:146 | G>A | IG |         |     |                              |        |
| Vc 35 | NZ_AAUT01000004:147 | G>A | EX | ACC>ATC | T>I | MdsD                         | nonsyn |
| Vc 34 | NZ_AAUT01000007:151 | C>T | EX | GGC>GGT | G>G | hypothetical                 | syn    |
| Vc 4  | NZ_AAUT01000047:155 | G>A | EX | CCA>TCA | P>S | transcriptional              | nonsyn |

|       |                     |     |    |         |     |                                         |        |
|-------|---------------------|-----|----|---------|-----|-----------------------------------------|--------|
| Vc 19 | NZ_AAUT01000011:156 | C>A | EX | CCC>ACC | P>T | hypothetical                            | nonsyn |
| Vc 11 | NZ_AAUT01000066:158 | C>T | EX | GCA>GTA | A>V | phosphate                               | nonsyn |
| Vc 59 | NZ_AAUT01000068:160 | T>C | EX | TGG>TGG | W>W | hypothetical                            | syn    |
| Vc 1  | NZ_AAUT01000064:161 | C>T | EX | TGA>TAA | *>* | hypothetical                            | syn    |
| Vc 41 | NZ_AAUT01000013:164 | G>T | EX | GCT>GAT | A>D | hypothetical                            | nonsyn |
| Vc 10 | NZ_AAUT01000037:165 | C>T | IG |         |     |                                         |        |
| Vc 25 | NZ_AAUT01000020:170 | G>T | EX | GAG>GAT | E>D | sensor                                  | nonsyn |
| Vc 1  | NZ_AAUT01000021:171 | C>T | IG |         |     |                                         |        |
| Vc 30 | NZ_AAUT01000054:179 | C>T | EX | ATG>ATA | M>I | sulfate                                 | nonsyn |
| Vc 19 | NZ_AAUT01000046:181 | T>G | EX | GGT>GGG | G>G | RTX                                     | syn    |
| Vc 11 | NZ_AAUT01000016:184 | T>G | IG |         |     |                                         |        |
| Vc 30 | NZ_AAUT01000010:185 | C>T | IG |         |     |                                         |        |
| Vc 49 | NZ_AAUT01000029:195 | G>T | EX | CTC>ATC | L>I | transporter                             | nonsyn |
| Vc 39 | NZ_AAUT01000046:195 | A>T | EX | CAA>CAT | Q>H | RTX                                     | nonsyn |
| Vc 39 | NZ_AAUT01000046:195 | A>T | EX | CAA>CAT | Q>H | RTX                                     | nonsyn |
| Vc 19 | NZ_AAUT01000011:196 | G>T | IG |         |     |                                         |        |
| Vc 61 | NZ_AAUT01000053:200 | A>C | IG |         |     |                                         |        |
| Vc 5  | NZ_AAUT01000008:203 | G>T | EX | GAG>TAG | E>* | hypothetical                            | nonsyn |
| Vc 23 | NZ_AAUT01000064:210 | C>A | EX | GAT>TAT | D>Y | 3-oxoacyl-(acyl-carrier-protein)        | nonsyn |
| Vc 16 | NZ_AAUT01000043:211 | C>T | EX | GAT>AAT | D>N | sensory                                 | nonsyn |
| Vc 63 | NZ_AAUT01000054:218 | C>T | EX | GCC>ACC | A>T | GGDEF                                   | nonsyn |
| Vc 43 | NZ_AAUT01000004:219 | C>T | EX | TTC>TTT | F>F | sodium/dicarboxylate                    | syn    |
| Vc 53 | NZ_AAUT01000035:223 | T>G | EX | GTA>GTC | V>V | polysaccharide                          | syn    |
| Vc 61 | NZ_AAUT01000005:225 | T>C | EX | TTT>TTC | F>F | hypothetical                            | syn    |
| Vc 70 | NZ_AAUT01000009:225 | G>A | EX | CTG>CTA | L>L | lipase,                                 | syn    |
| Vc 39 | NZ_AAUT01000037:225 | G>A | IG |         |     |                                         |        |
| Vc 17 | NZ_AAUT01000018:232 | C>T | EX | GAG>AAG | E>K | alpha-1,6-galactosidase,                | nonsyn |
| Vc 4  | NZ_AAUT01000006:237 | C>A | EX | GAA>TAA | E>* | GGDEF                                   | nonsyn |
| Vc 9  | NZ_AAUT01000052:243 | G>A | EX | GGC>AGC | G>S | aspartokinase,                          | nonsyn |
| Vc 49 | NZ_AAUT01000033:271 | T>C | EX | AGT>AGC | S>S | UDP-N-acetylmuramoylalanyl-D-glutamyl-2 | syn    |
| Vc 48 | NZ_AAUT01000026:287 | G>A | EX | GAG>GAA | E>E | glutaminyl-tRNA                         | syn    |
| Vc 31 | NZ_AAUT01000004:288 | C>A | EX | CTC>ATC | L>I | methyl-accepting                        | nonsyn |
| Vc 63 | NZ_AAUT01000026:295 | A>G | EX | AAG>AGG | K>R | glutaminyl-tRNA                         | nonsyn |
| Vc 17 | NZ_AAUT01000035:313 | G>T | IG |         |     |                                         |        |
| Vc 23 | NZ_AAUT01000034:327 | C>T | IG |         |     |                                         |        |
| Vc 53 | NZ_AAUT01000017:331 | T>G | EX | GTG>GGG | V>G | flagellar                               | nonsyn |
| Vc 33 | NZ_AAUT01000002:332 | T>C | EX | ACC>GCC | T>A | oxaloacetate                            | nonsyn |
| Vc 35 | NZ_AAUT01000027:333 | A>G | EX | CTG>CCG | L>P | LuxO                                    | nonsyn |
| Vc 33 | NZ_AAUT01000030:346 | C>T | IG |         |     |                                         |        |
| Vc 8  | NZ_AAUT01000013:347 | G>T | IG |         |     |                                         |        |
| Vc 43 | NZ_AAUT01000014:370 | T>A | IG |         |     |                                         |        |
| Vc 37 | NZ_AAUT01000009:388 | G>A | EX | GCA>ACA | A>T | hydrolase,                              | nonsyn |
| Vc 47 | NZ_AAUT01000021:393 | G>T | EX | GCG>GCT | A>A | carbonic                                | syn    |
| Vc 51 | NZ_AAUT01000010:404 | A>C | EX | TAT>TCT | Y>S | hypothetical                            | nonsyn |
| Vc 4  | NZ_AAUT01000021:425 | A>T | EX | TAC>AAC | Y>N | glycine                                 | nonsyn |
| Vc 1  | NZ_AAUT01000020:441 | G>A | EX | GGC>AGC | G>S | cysteine                                | nonsyn |
| Vc 45 | NZ_AAUT01000016:442 | C>G | EX | AAC>AAG | N>K | vgrG                                    | nonsyn |
| Vc 52 | NZ_AAUT01000005:448 | T>G | IG |         |     |                                         |        |
| Vc 29 | NZ_AAUT01000018:449 | A>G | IG |         |     |                                         |        |
| Vc 51 | NZ_AAUT01000004:452 | T>G | EX | CAA>CCA | Q>P | vgrG                                    | nonsyn |
| Vc 28 | NZ_AAUT01000004:467 | G>A | EX | GGC>GGT | G>G | hcp                                     | syn    |
| Vc 53 | NZ_AAUT01000008:471 | G>A | EX | CTT>TTT | L>F | acyl                                    | nonsyn |
| Vc 39 | NZ_AAUT01000011:490 | G>A | EX | CAA>TAA | Q>* | methyl-accepting                        | nonsyn |
| Vc 48 | NZ_AAUT01000011:560 | T>G | EX | CTA>CTC | L>L | 6-phospho-beta-glucosidase              | syn    |
| Vc 22 | NZ_AAUT01000012:584 | C>T | EX | GTT>ATT | V>I | type                                    | nonsyn |
| Vc 70 | NZ_AAUT01000008:639 | A>G | EX | CAG>CGG | Q>R | 3-deoxy-D-manno-octulosonic-acid        | nonsyn |
| Vc 57 | NZ_AAUT01000002:644 | A>G | EX | ATA>GTA | I>V | ToxR-activated                          | nonsyn |
| Vc 65 | NZ_AAUT01000005:696 | G>C | IG |         |     |                                         |        |
| Vc 66 | NZ_AAUT01000006:709 | G>T | EX | CTG>CTT | L>L | transcriptional                         | syn    |

|       |                      |     |    |         |     |                    |        |  |
|-------|----------------------|-----|----|---------|-----|--------------------|--------|--|
| Vc 51 | NZ_AAUT01000007:757! | C>T | IG |         |     |                    |        |  |
| Vc 34 | NZ_AAUT01000007:761! | C>T | IG |         |     |                    |        |  |
| Vc 30 | NZ_AAUT01000005:806! | T>G | EX | TTT>GTT | F>V | acetyltransferase, | nonsyn |  |
| Vc 23 | NZ_AAUT01000002:857! | C>T | EX | TAC>TAT | Y>Y | leader             | syn    |  |
| Vc 37 | NZ_AAUT01000002:903! | G>T | EX | GGT>TGT | G>C | tagE               | nonsyn |  |
| Vc 63 | NZ_AAUT01000001:954! | G>A | EX | ACA>ATA | T>I | sugar              | nonsyn |  |
| Vc 51 | NZ_AAUT01000001:971! | C>T | EX | CAA>TAA | Q>* | sodium/solute      | nonsyn |  |
| Vc 31 | NZ_AAUT01000003:975! | G>A | EX | AAG>AAA | K>K | hypothetical       | syn    |  |
| Vc 25 | NZ_AAUT01000004:994! | C>T | EX | GTC>GTT | V>V | hypothetical       | syn    |  |
| Vc 45 | NZ_AAUT01000002:103! | T>C | IG |         |     |                    |        |  |
| Vc 23 | NZ_AAUT01000001:112! | C>T | EX | GAA>AAA | E>K | sucrose            | nonsyn |  |
| Vc 10 | NZ_AAUT01000003:120! | A>G | EX | GAT>GAC | D>D | quinolinate        | syn    |  |

---
