# Supplementary material for: Evolution of the Insertion-Deletion Mutation Rate Across the Tree of Life
Source: Oxford University Press journal article supplement (doi:10.1534/g3.116.030890), 2016-06-25
Supplement: 030890_figures2.pdf [file 030890_figures2.pdf]

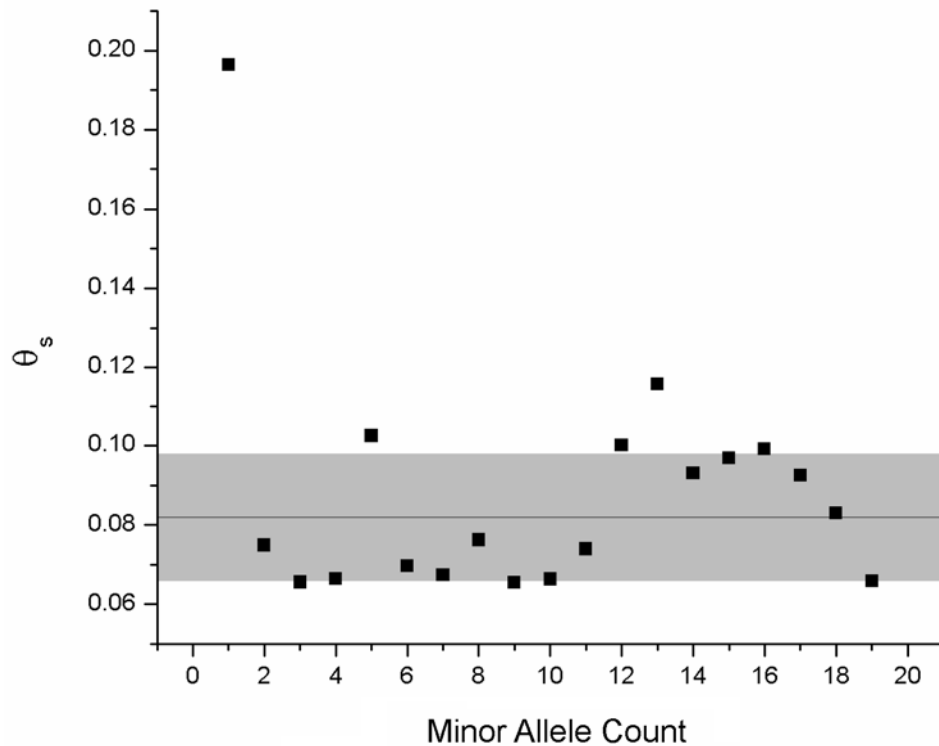

**Figure S2.** Estimate of  $\theta_s$  from minor allele counts (*Escherichia coli* data shown). X-axis denotes the minor allele count (observed number of strains that have the allele). Formula used to calculate  $\theta_s$  is derived from equations 6-8 of Fu (1995). Horizontal gray line indicates the average of  $\theta_s$  across all allele frequencies excluding unique alleles (minor allele count of 1) and is closely related to Watterson's theta (See Supplemental Materials – Calculation of  $\theta_s$ ). Shaded region indicates one standard deviation from the mean of all points except for unique alleles.
