# Supplementary material for: Evolution of the Insertion-Deletion Mutation Rate Across the Tree of Life
Source: Oxford University Press journal article supplement (doi:10.1534/g3.116.030890), 2016-06-25
Supplement: 030890_figures6.pdf [file 030890_figures6.pdf]

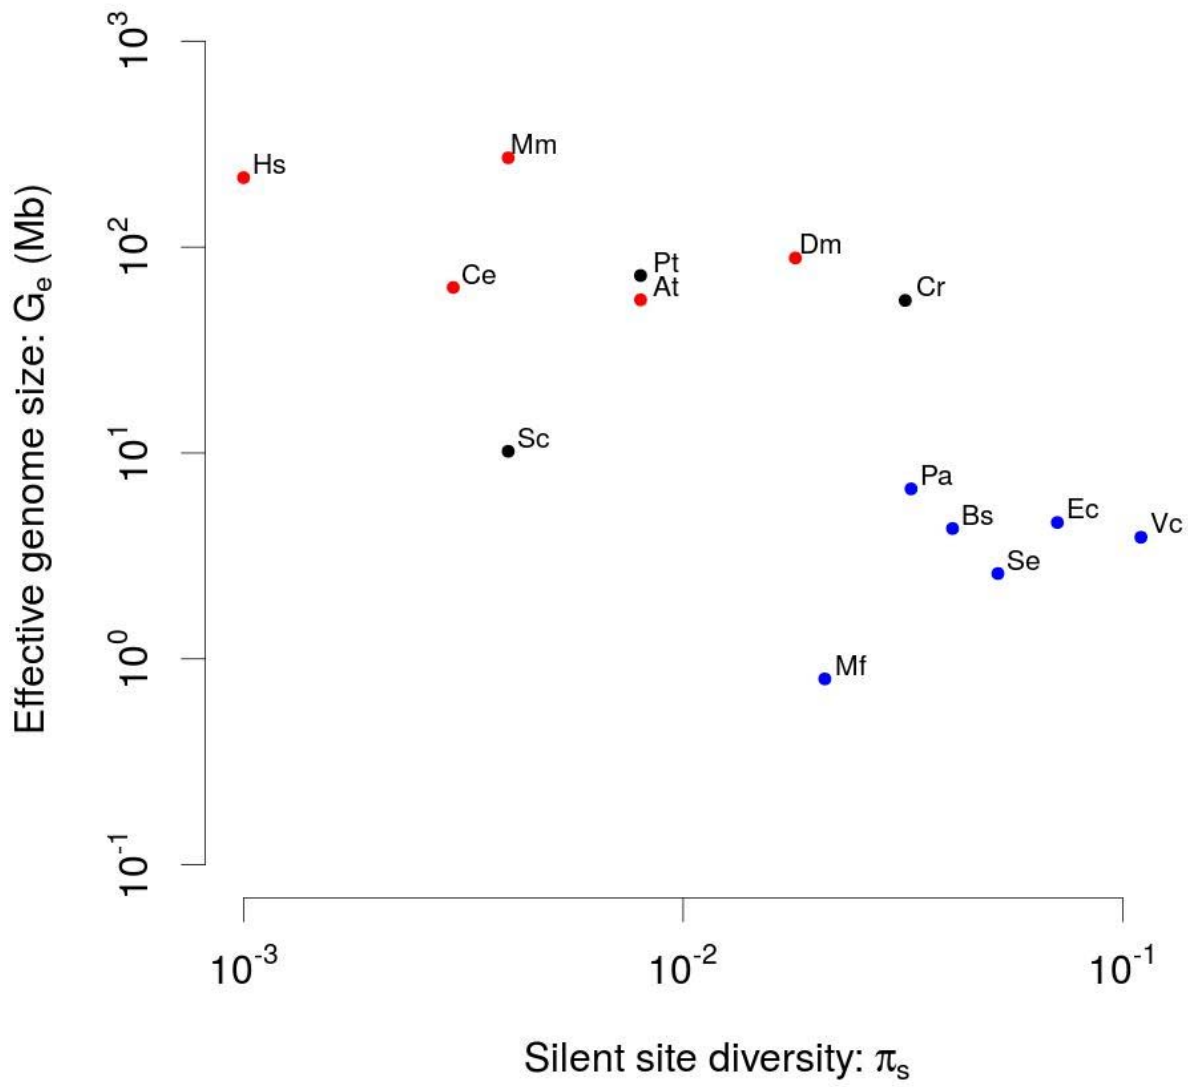

Figure S6: A scatter-plot of effective genome size ( $G_e$ ) against silent site diversity ( $\pi_s$ ).
