# Supplementary material for: Evolution of the Insertion-Deletion Mutation Rate Across the Tree of Life
Source: Oxford University Press journal article supplement (doi:10.1534/g3.116.030890), 2016-06-25
Supplement: 030890_tables2.pdf [file 030890_tables2.pdf]

Table S2: Regression coefficients of the variables relating effective population size to deleterious mutation rate. Slopes are predicted under the null model (where effective population size is unassociated with the deleterious mutation rate) and the minimal version of the drift-barrier hypothesis (where only the deleterious mutation rate is affected by effective population size).

| Covariance terms | Slope | regression slope $\beta$<br>(lower CI, upper CI) | Null  | DBH |
|------------------|-------|--------------------------------------------------|-------|-----|
| $G_e, u_{bs}$    | 0.07  | (-0.4, 0.4)                                      | 0     | 0   |
| $G_e, \pi_s$     | -0.84 | (-1.4, -0.3)                                     | 0**   | -1  |
| $u_{bs}, \pi_s$  | -0.62 | (-1.3, -0.)                                      | 1**** | 0*  |
