# Supplementary material for: Evolution of the Insertion-Deletion Mutation Rate Across the Tree of Life
Source: PubMed Central journal article supplement (PMC4978911; doi:10.1534/g3.116.030890), 2016-06-15
Supplement: supp_g3.116.030890_DatasetS2.pdf [file supp_g3.116.030890_DatasetS2.pdf]

**Dataset S2.**

*Caenorhabditis elegans* N2 insertion-deletion (indel) summary statistics after an average of 250 generations (Gen). SEM is the standard error.

| MA<br>Line | Indels |      | Sites ( $\times 10^6$ ) | Gen. | Indel Rate<br>( $\times 10^{-10}$ )<br>/events /gen. |
|------------|--------|------|-------------------------|------|------------------------------------------------------|
|            | Ins.   | Del. |                         |      |                                                      |
| Ce 523     | 5      | 8    | 64.5                    | 247  | 8.16                                                 |
| Ce 526     | 3      | 0    | 60.5                    | 245  | 2.03                                                 |
| Ce 529     | 9      | 4    | 82.4                    | 256  | 6.16                                                 |
| Ce 538     | 9      | 8    | 83.5                    | 250  | 8.16                                                 |
| Ce 535     | 0      | 0    | 56.2                    | 256  | 0.00                                                 |
| Ce 553     | 3      | 3    | 77.5                    | 241  | 2.68                                                 |
| Ce 574     | 21     | 8    | 86.5                    | 258  | 13.0                                                 |
| Sum        | 50     | 31   | --                      | --   | --                                                   |
| Ave.       | 7.14   | 4.43 | 73.01                   | 250  | 5.74                                                 |
| SEM        | 2.83   | 1.49 | 5.03                    | 2.63 | 1.83                                                 |
