# Supplementary material for: Evolution of the Insertion-Deletion Mutation Rate Across the Tree of Life
Source: PubMed Central journal article supplement (PMC4978911; doi:10.1534/g3.116.030890), 2016-06-15
Supplement: supp_g3.116.030890_DatasetS4.pdf [file supp_g3.116.030890_DatasetS4.pdf]

## Dataset S4.

List of insertion-deletion mutation calls for *Agrobacterium tumefaciens* (Agt), *Bacillus subtilis* (Bs), *Escherichia coli* (Ec), *Mesoplasma florum* (Mf), *Vibrio cholerae* (Vc), and *Caenorhabditis elegans* (Ce). IG - intergenic, EX - exon. Line column indicates the organism and MA line where indel is called separated by (|). Algorithm (Alg.) is the mapping algorithm that identified the indel (N-Novoalign, B-Bwa, P-Pindel). Gene is the gene name or type of gene where the insertion/deletion occurs, (-) indicates no known gene at location. Confirmed (conf.) column indicates if the mutation was verified using direct sequencing (seq), gel electrophoresis (gel), or did not amplify (-).

| Line   | Scaffold:Position   | Size   | Alg. |   |   | EX or IG | Gene                    | Conf. |
|--------|---------------------|--------|------|---|---|----------|-------------------------|-------|
|        |                     |        | N    | B | P |          |                         |       |
| Agt 44 | NC_003064.2:4506    | 1      | *    | * | * | EX       | fructosyl               |       |
| Agt 26 | NC_003065.3:7362    | 1      | *    | * | * | EX       | hypothetical            |       |
| Agt 36 | NC_003065.3:71571   | -1     | *    | * | - | IG       | -                       |       |
| Agt 42 | NC_003062.2:82741   | -4     | *    | * | * | EX       | permease                |       |
| Agt 25 | NC_003063.2:195916  | 1      | *    | * | * | IG       | -                       |       |
| Agt 30 | NC_003063.2:225220  | -1     | *    | * | - | EX       | ftsk                    |       |
| Agt 11 | NC_003064.2:229665  | 1      | *    | * | * | EX       | D-serine                |       |
| Agt 36 | NC_003064.2:320813  | -1     | *    | * | - | EX       | D-isomer                |       |
| Agt 34 | NC_003063.2:364471  | 1      | *    | * | - | IG       | -                       |       |
| Agt 55 | NC_003064.2:392047  | -1     | *    | * | - | EX       | dihydrodipicolinate     |       |
| Agt 53 | NC_003064.2:392047  | -1     | *    | * | - | EX       | dihydrodipicolinate     |       |
| Agt 5  | NC_003063.2:504098  | -3     | *    | * | - | EX       | oligopeptide            |       |
| Agt 7  | NC_003063.2:546849  | 6      | *    | * | * | EX       | diguanylate             |       |
| Agt 2  | NC_003063.2:625417  | -1     | *    | * | - | EX       | hypothetical            |       |
| Agt 30 | NC_003062.2:762254  | 1      | *    | * | * | IG       | -                       |       |
| Agt 36 | NC_003062.2:801590  | 1      | *    | * | - | EX       | pyruvate,orthophosphate |       |
| Agt 15 | NC_003062.2:880411  | -12    | *    | * | * | EX       | acetyltransferase       |       |
| Agt 59 | NC_003063.2:1029884 | -1     | *    | * | * | EX       | hypothetical            |       |
| Agt 44 | NC_003062.2:1175889 | -10307 | -    | - | * | IG       | -                       |       |
| Agt 9  | NC_003062.2:1175889 | -10307 | -    | - | * | IG       | -                       |       |
| Agt 39 | NC_003063.2:1181859 | 1      | *    | * | * | EX       | hypothetical            |       |
| Agt 25 | NC_003062.2:1182402 | -1     | *    | * | * | IG       | -                       |       |
| Agt 45 | NC_003062.2:1182402 | 1      | -    | - | * | IG       | -                       |       |
| Agt 5  | NC_003062.2:1191021 | -1     | *    | * | * | EX       | ABC                     |       |
| Agt 26 | NC_003062.2:1220203 | -1     | *    | * | * | IG       | -                       |       |
| Agt 57 | NC_003062.2:1220203 | -1     | *    | * | - | IG       | -                       |       |
| Agt 29 | NC_003062.2:1220203 | 1      | *    | * | - | IG       | -                       |       |
| Agt 46 | NC_003062.2:1275276 | -1     | *    | * | - | EX       | hypothetical            |       |
| Agt 20 | NC_003063.2:1306030 | 2      | *    | * | - | IG       | -                       |       |
| Agt 53 | NC_003063.2:1306030 | 1      | *    | * | - | IG       | -                       |       |
| Agt 55 | NC_003063.2:1306030 | 1      | *    | * | - | IG       | -                       |       |
| Agt 7  | NC_003063.2:1380071 | -1     | *    | * | * | EX       | Lacl                    |       |
| Agt 51 | NC_003063.2:1402387 | -1     | *    | * | * | EX       | LamB/YcsF               |       |
| Agt 4  | NC_003063.2:1426511 | -1     | *    | * | - | EX       | hypothetical            |       |
| Agt 42 | NC_003063.2:1447051 | -1     | *    | * | * | IG       | -                       |       |
| Agt 58 | NC_003062.2:1501701 | -30    | *    | * | * | EX       | single-strand           |       |
| Agt 44 | NC_003063.2:1520361 | 1      | *    | * | * | EX       | nitrite                 |       |
| Agt 46 | NC_003062.2:1538924 | -1     | *    | * | - | EX       | formate                 |       |
| Agt 51 | NC_003062.2:1538924 | -1     | *    | * | * | EX       | formate                 |       |
| Agt 51 | NC_003063.2:1556554 | -1     | *    | * | * | IG       | -                       |       |
| Agt 32 | NC_003063.2:1635958 | 1      | *    | * | * | IG       | -                       |       |

|        |                       |     |   |   |   |    |              |     |
|--------|-----------------------|-----|---|---|---|----|--------------|-----|
| Agt 55 | NC_003063.2:1700261   | -1  | * | * | - | EX | myo-inositol |     |
| Agt 28 | NC_003062.2:1737920   | -3  | * | * | - | EX | hypothetical |     |
| Agt 5  | NC_003063.2:1789815   | -1  | * | * | - | EX | noIF         |     |
| Agt 59 | NC_003063.2:1829949   | -1  | * | * | - | EX | ABC          |     |
| Agt 15 | NC_003063.2:1829949   | 1   | * | * | - | EX | ABC          |     |
| Agt 10 | NC_003063.2:2040017   | -1  | * | * | * | IG | -            |     |
| Agt 40 | NC_003062.2:2471250   | 1   | * | * | - | IG | -            |     |
| Agt 26 | NC_003062.2:2829423   | -1  | * | * | * | EX | hypothetical |     |
| Agt 7  | NC_003062.2:2838293   | -1  | * | * | * | IG | -            |     |
| Bs 7   | NZ_CM000488.1:3154    | 1   | * | * | * | IG | -            | seq |
| Bs 57  | NZ_CM000488.1:29645   | -1  | * | * | * | EX | hypothetical |     |
| Bs 46  | plasmid:31466         | -6  | * | * | * | IG | -            |     |
| Bs 20  | plasmid:59759         | -66 | - | - | * | IG | -            |     |
| Bs 19  | NZ_CM000488.1:90374   | -1  | * | * | * | IG | -            | seq |
| Bs 30  | NZ_CM000488.1:90374   | -1  | * | * | * | IG | -            |     |
| Bs 45  | NZ_CM000488.1:267583  | 1   | * | * | * | EX | hypothetical |     |
| Bs 35  | NZ_CM000488.1:367560  | -1  | * | * | * | EX | hypothetical |     |
| Bs 26  | NZ_CM000488.1:446576  | -10 | - | - | * | EX | hypothetical | seq |
| Bs 3   | NZ_CM000488.1:491130  | -30 | * | * | * | EX | manganese    |     |
| Bs 69  | NZ_CM000488.1:491130  | -30 | * | * | * | EX | manganese    |     |
| Bs 22  | NZ_CM000488.1:491130  | -30 | * | * | * | EX | manganese    |     |
| Bs 68  | NZ_CM000488.1:491130  | -30 | * | * | * | EX | manganese    |     |
| Bs 28  | NZ_CM000488.1:491130  | -30 | * | * | * | EX | manganese    |     |
| Bs 32  | NZ_CM000488.1:491130  | -30 | * | * | * | EX | manganese    |     |
| Bs 35  | NZ_CM000488.1:491130  | -30 | * | * | * | EX | manganese    |     |
| Bs 30  | NZ_CM000488.1:491130  | -30 | - | - | * | EX | manganese    |     |
| Bs 27  | NZ_CM000488.1:491130  | -30 | - | - | * | EX | manganese    |     |
| Bs 36  | NZ_CM000488.1:491130  | -30 | - | - | * | EX | manganese    |     |
| Bs 71  | NZ_CM000488.1:491130  | -30 | - | - | * | EX | manganese    |     |
| Bs 74  | NZ_CM000488.1:491130  | -30 | - | - | * | EX | manganese    |     |
| Bs 38  | NZ_CM000488.1:491130  | -30 | - | - | * | EX | manganese    |     |
| Bs 40  | NZ_CM000488.1:491130  | -30 | - | - | * | EX | manganese    |     |
| Bs 43  | NZ_CM000488.1:491130  | -30 | - | - | * | EX | manganese    |     |
| Bs 65  | NZ_CM000488.1:491130  | -30 | - | - | * | EX | manganese    |     |
| Bs 39  | NZ_CM000488.1:491130  | -30 | - | - | * | EX | manganese    |     |
| Bs 31  | NZ_CM000488.1:491130  | -30 | - | - | * | EX | manganese    |     |
| Bs 37  | NZ_CM000488.1:491130  | -30 | - | - | * | EX | manganese    |     |
| Bs 20  | NZ_CM000488.1:505821  | -1  | * | * | * | EX | hypothetical |     |
| Bs 62  | NZ_CM000488.1:524912  | -1  | * | * | * | EX | hypothetical | seq |
| Bs 6   | NZ_CM000488.1:525198  | 1   | * | * | * | IG | -            | seq |
| Bs 62  | NZ_CM000488.1:525198  | 1   | * | * | * | IG | -            |     |
| Bs 27  | NZ_CM000488.1:531210  | -1  | * | * | * | IG | -            |     |
| Bs 6   | NZ_CM000488.1:555880  | 1   | * | * | * | IG | -            | seq |
| Bs 1   | NZ_CM000488.1:559201  | 1   | * | * | * | IG | -            | seq |
| Bs 26  | NZ_CM000488.1:599768  | 1   | * | * | * | EX | hypothetical | seq |
| Bs 30  | NZ_CM000488.1:607751  | -1  | * | * | * | IG | -            |     |
| Bs 68  | NZ_CM000488.1:615440  | -1  | * | * | * | EX | hypothetical |     |
| Bs 14  | NZ_CM000488.1:626136  | -1  | * | * | * | EX | hypothetical |     |
| Bs 45  | NZ_CM000488.1:755445  | 1   | * | * | * | EX | polypeptide  |     |
| Bs 62  | NZ_CM000488.1:800459  | 11  | * | * | * | IG | -            | --  |
| Bs 32  | NZ_CM000488.1:886044  | -12 | * | * | * | EX | hypothetical | --  |
| Bs 54  | NZ_CM000488.1:923830  | 1   | * | * | * | EX | YfhE         |     |
| Bs 28  | NZ_CM000488.1:959034  | -9  | * | * | * | EX | vegetative   | --  |
| Bs 8   | NZ_CM000488.1:960654  | 1   | * | * | - | EX | aliphatic    |     |
| Bs 3   | NZ_CM000488.1:1073004 | 6   | * | * | * | IG | -            | --  |
| Bs 31  | NZ_CM000488.1:1073004 | 6   | * | * | * | IG | -            | --  |
| Bs 45  | NZ_CM000488.1:1100167 | -1  | * | * | * | IG | -            |     |
| Bs 22  | NZ_CM000488.1:1151601 | -1  | * | * | * | EX | hypothetical | seq |
| Bs 37  | NZ_CM000488.1:1209732 | -1  | * | * | * | IG | -            |     |

|       |                       |       |   |   |   |    |                             |     |
|-------|-----------------------|-------|---|---|---|----|-----------------------------|-----|
| Bs 1  | NZ_CM000488.1:1327050 | -1    | * | * | * | EX | hypothetical                |     |
| Bs 69 | NZ_CM000488.1:1335634 | 24    | - | - | * | EX | hypothetical                | seq |
| Bs 11 | NZ_CM000488.1:1425882 | 1     | * | * | * | EX | transaminase                | seq |
| Bs 15 | NZ_CM000488.1:1466869 | 1     | * | * | * | IG | -                           |     |
| Bs 55 | NZ_CM000488.1:1547731 | 1     | * | * | * | EX | hypothetical                |     |
| Bs 51 | NZ_CM000488.1:1630257 | -5    | * | * | - | EX | phosphoadenosine            | --  |
| Bs 24 | NZ_CM000488.1:1676959 | -1    | * | * | * | EX | ribonuclease                | seq |
| Bs 26 | NZ_CM000488.1:1676959 | -1    | * | * | * | EX | ribonuclease                |     |
| Bs 65 | NZ_CM000488.1:1714855 | -1    | * | * | * | EX | inhibition                  | seq |
| Bs 28 | NZ_CM000488.1:1740917 | -1    | * | * | * | EX | hypothetical                |     |
| Bs 38 | NZ_CM000488.1:1755104 | -1    | * | * | * | IG | -                           |     |
| Bs 45 | NZ_CM000488.1:1777288 | -309  | - | - | * | EX | DNA                         | gel |
| Bs 4  | NZ_CM000488.1:1866729 | 1     | * | * | * | EX | RNA-binding                 | seq |
| Bs 36 | NZ_CM000488.1:1922151 | -1    | * | * | * | EX | hypothetical                |     |
| Bs 45 | NZ_CM000488.1:1938149 | -1401 | - | - | * | EX | amino                       |     |
| Bs 48 | NZ_CM000488.1:1938149 | -1401 | - | - | * | EX | amino                       |     |
| Bs 51 | NZ_CM000488.1:1938149 | -1401 | - | - | * | EX | amino                       |     |
| Bs 50 | NZ_CM000488.1:1938149 | -1401 | - | - | * | EX | amino                       |     |
| Bs 44 | NZ_CM000488.1:1938149 | -1401 | - | - | * | EX | amino                       |     |
| Bs 41 | NZ_CM000488.1:1938149 | -1401 | - | - | * | EX | amino                       |     |
| Bs 52 | NZ_CM000488.1:1938149 | -1401 | - | - | * | EX | amino                       |     |
| Bs 46 | NZ_CM000488.1:1938149 | -1401 | - | - | * | EX | amino                       |     |
| Bs 49 | NZ_CM000488.1:1938149 | -1401 | - | - | * | EX | amino                       |     |
| Bs 69 | NZ_CM000488.1:1943490 | 4     | * | * | * | EX | endo-1,4-beta-xylanase      |     |
| Bs 8  | NZ_CM000488.1:1944358 | -4136 | - | - | * | EX | endo-1,4-beta-xylanase      | gel |
| Bs 45 | NZ_CM000488.1:2064605 | -1    | * | * | * | EX | hypothetical                |     |
| Bs 26 | NZ_CM000488.1:2068187 | -1    | * | * | * | EX | hypothetical                |     |
| Bs 22 | NZ_CM000488.1:2097878 | -1    | * | * | * | EX | hypothetical                |     |
| Bs 35 | NZ_CM000488.1:2152742 | 1     | * | * | * | EX | hypothetical                | seq |
| Bs 74 | NZ_CM000488.1:2154392 | 1     | * | * | * | EX | hypothetical                |     |
| Bs 41 | NZ_CM000488.1:2170495 | 1     | * | * | * | EX | hypothetical                | seq |
| Bs 32 | NZ_CM000488.1:2228381 | -1    | * | * | * | IG | -                           |     |
| Bs 63 | NZ_CM000488.1:2256708 | 1     | * | * | * | EX | hypothetical                |     |
| Bs 60 | NZ_CM000488.1:2289257 | -1    | * | * | * | EX | hypothetical                | seq |
| Bs 31 | NZ_CM000488.1:2304761 | -2    | * | * | * | EX | homoserine                  |     |
| Bs 27 | NZ_CM000488.1:2316414 | -1    | * | * | * | EX | naringenin-chalcone         | seq |
| Bs 69 | NZ_CM000488.1:2317269 | -1    | * | * | * | IG | -                           |     |
| Bs 24 | NZ_CM000488.1:2319727 | -1    | * | * | * | EX | hypothetical                |     |
| Bs 36 | NZ_CM000488.1:2383704 | -1    | * | * | * | EX | transcription               |     |
| Bs 46 | NZ_CM000488.1:2419719 | -1    | * | * | * | EX | required                    |     |
| Bs 40 | NZ_CM000488.1:2426419 | -1    | * | * | * | EX | hypothetical                |     |
| Bs 13 | NZ_CM000488.1:2441288 | -2    | * | * | * | EX | sporulation                 | seq |
| Bs 35 | NZ_CM000488.1:2485995 | -1    | * | * | * | EX | hypothetical                | seq |
| Bs 38 | NZ_CM000488.1:2493380 | 1     | * | * | * | EX | multidrug                   |     |
| Bs 19 | NZ_CM000488.1:2513723 | -1    | * | * | * | EX | hypothetical                |     |
| Bs 51 | NZ_CM000488.1:2543900 | 1     | * | * | * | EX | hypothetical                |     |
| Bs 24 | NZ_CM000488.1:2673381 | 19    | - | - | * | EX | hypothetical                | seq |
| Bs 63 | NZ_CM000488.1:2679304 | 1     | * | * | * | IG | -                           |     |
| Bs 62 | NZ_CM000488.1:2716393 | -1    | * | * | * | EX | multidrug-efflux            |     |
| Bs 49 | NZ_CM000488.1:2731200 | 1     | * | * | * | EX | cytochrome                  |     |
| Bs 2  | NZ_CM000488.1:2813831 | 1     | * | * | * | EX | hypothetical                | seq |
| Bs 54 | NZ_CM000488.1:2856918 | -2    | - | - | * | IG | -                           |     |
| Bs 17 | NZ_CM000488.1:2863466 | -1    | * | * | * | EX | spatial                     |     |
| Bs 63 | NZ_CM000488.1:2868738 | -2    | * | * | - | IG | -                           | seq |
| Bs 39 | NZ_CM000488.1:2924109 | -1    | * | * | * | IG | -                           |     |
| Bs 43 | NZ_CM000488.1:2924109 | -1    | * | * | * | IG | -                           |     |
| Bs 20 | NZ_CM000488.1:2938004 | -2    | * | * | * | EX | alpha-L-arabinofuranosidase |     |
| Bs 55 | NZ_CM000488.1:2950906 | 1     | * | * | * | EX | hypothetical                |     |
| Bs 36 | NZ_CM000488.1:2993837 | 1     | * | * | * | EX | hypothetical                |     |

|        |                       |     |   |   |    |    |              |     |
|--------|-----------------------|-----|---|---|----|----|--------------|-----|
| Bs 45  | NZ_CM000488.1:3009637 | -1  | * | * | *  | IG | -            | seq |
| Bs 6   | NZ_CM000488.1:3009637 | -1  | * | * | *  | IG | -            |     |
| Bs 55  | NZ_CM000488.1:3051738 | -1  | * | * | *  | IG | -            |     |
| Bs 43  | NZ_CM000488.1:3058502 | -1  | * | * | *  | IG | -            | seq |
| Bs 45  | NZ_CM000488.1:3058502 | -1  | * | * | *  | IG | -            |     |
| Bs 54  | NZ_CM000488.1:3104151 | -1  | * | * | *  | IG | -            |     |
| Bs 60  | NZ_CM000488.1:3371555 | -1  | * | * | *  | IG | -            |     |
| Bs 39  | NZ_CM000488.1:3371577 | -1  | * | * | *  | EX | hypothetical |     |
| Bs 17  | NZ_CM000488.1:3543935 | 1   | * | * | *  | EX | hypothetical | seq |
| Bs 55  | NZ_CM000488.1:3651513 | -1  | * | * | *  | EX | biosynthesis |     |
| Bs 22  | NZ_CM000488.1:3696920 | -1  | * | * | *  | EX | hypothetical |     |
| Bs 39  | NZ_CM000488.1:3706735 | -1  | * | * | *  | IG | -            |     |
| Bs 6   | NZ_CM000488.1:3769959 | -1  | * | * | *  | EX | hypothetical | seq |
| Bs 74  | NZ_CM000488.1:3769959 | -1  | * | * | *  | EX | hypothetical |     |
| Bs 48  | NZ_CM000488.1:3815217 | -21 | * | * | *  | EX | hypothetical | --  |
| Bs 6   | NZ_CM000488.1:3873136 | -1  | * | * | *  | EX | hypothetical |     |
| Bs 69  | NZ_CM000488.1:3879665 | -44 | - | - | *  | IG | -            | seq |
| Bs 8   | NZ_CM000488.1:3933228 | -39 | - | - | *  | EX | hypothetical |     |
| Bs 8   | NZ_CM000488.1:3933266 | -1  | * | * | *  | EX | hypothetical | seq |
| Bs 17  | NZ_CM000488.1:4100765 | -1  | * | * | *  | EX | hypothetical |     |
| Ce 529 | NC_003284:21431       | 1   | * | * | NA | IG | -            |     |
| Ce 523 | NC_003279:229092      | -1  | * | * | NA | IG | -            |     |
| Ce 529 | NC_003279:229092      | -1  | * | * | NA | IG | -            |     |
| Ce 538 | NC_003279:230551      | -1  | * | * | NA | IG | -            |     |
| Ce 553 | NC_003279:230554      | -1  | * | * | NA | IG | -            |     |
| Ce 553 | NC_003281:313084      | 1   | * | * | NA | EX | Y50D7A.1     |     |
| Ce 574 | NC_003280:362422      | -1  | * | * | NA | IG | -            |     |
| Ce 529 | NC_003284:425461      | 1   | * | * | NA | EX | ZK1193.4     |     |
| Ce 574 | NC_003282:440589      | -1  | * | * | NA | IG | -            |     |
| Ce 523 | NC_003284:538145      | -1  | * | * | NA | EX | F28C10.4     |     |
| Ce 574 | NC_003281:666843      | 1   | * | * | NA | IG | -            |     |
| Ce 574 | NC_003279:774903      | 1   | * | * | NA | EX | T06A4.1      |     |
| Ce 538 | NC_003283:941768      | -1  | * | * | NA | EX | Y50D4C.3     |     |
| Ce 574 | NC_003282:1480525     | 1   | * | * | NA | IG | -            |     |
| Ce 574 | NC_003280:1580398     | 2   | * | * | NA | IG | -            |     |
| Ce 553 | NC_003284:2428247     | -1  | * | * | NA | IG | -            |     |
| Ce 574 | NC_003283:2606202     | 1   | * | * | NA | EX | F53E10.3     |     |
| Ce 574 | NC_003280:2642035     | 1   | * | * | NA | IG | -            |     |
| Ce 574 | NC_003279:3259385     | -1  | * | * | NA | IG | -            |     |
| Ce 574 | NC_003284:3271341     | 1   | * | * | NA | IG | -            |     |
| Ce 574 | NC_003284:3314891     | 1   | * | * | NA | IG | -            |     |
| Ce 574 | NC_003284:3413738     | 1   | * | * | NA | EX | dhs-27       |     |
| Ce 523 | NC_003284:3860506     | 1   | * | * | NA | IG | -            |     |
| Ce 538 | NC_003284:3867534     | 2   | * | * | NA | IG | -            |     |
| Ce 523 | NC_003284:3875662     | -1  | * | * | NA | IG | -            |     |
| Ce 574 | NC_003281:4007037     | 1   | * | * | NA | EX | pxd-1        |     |
| Ce 526 | NC_003281:4196878     | 1   | * | * | NA | IG | -            |     |
| Ce 574 | NC_003284:4216410     | 1   | * | * | NA | EX | -            |     |
| Ce 529 | NC_003281:5053760     | 1   | * | * | NA | IG | -            |     |
| Ce 523 | NC_003279:5357110     | -1  | * | * | NA | IG | -            |     |
| Ce 574 | NC_003284:6013738     | 1   | * | * | NA | IG | -            |     |
| Ce 529 | NC_003280:6533103     | -1  | * | * | NA | EX | abcx-1       |     |
| Ce 574 | NC_003280:6533103     | -1  | * | * | NA | EX | abcx-1       |     |
| Ce 538 | NC_003284:6606591     | 1   | * | * | NA | IG | -            |     |
| Ce 538 | NC_003280:6657828     | 1   | * | * | NA | EX | T19D12.10    |     |
| Ce 523 | NC_003280:6730826     | -1  | * | * | NA | EX | T14B4.9      |     |
| Ce 523 | NC_003280:6730862     | -1  | * | * | NA | EX | T14B4.9      |     |
| Ce 538 | NC_003280:6730862     | -1  | * | * | NA | EX | T14B4.9      |     |
| Ce 523 | NC_003283:6896914     | 1   | * | * | NA | IG | -            |     |

|        |                     |       |   |   |    |    |               |
|--------|---------------------|-------|---|---|----|----|---------------|
| Ce 538 | NC_003283:6972737   | 1     | * | * | NA | EX | srx-59        |
| Ce 538 | NC_003280:6999650   | 1     | * | * | NA | EX | unc-104       |
| Ce 529 | NC_003284:7068593   | 1     | * | * | NA | IG | -             |
| Ce 574 | NC_003284:7068593   | 1     | * | * | NA | IG | -             |
| Ce 529 | NC_003280:7422380   | 1     | * | * | NA | IG | -             |
| Ce 574 | NC_003280:7422380   | 1     | * | * | NA | IG | -             |
| Ce 553 | NC_003281:7453357   | -2    | * | * | NA | IG | -             |
| Ce 574 | NC_003281:7643635   | 1     | * | * | NA | IG | -             |
| Ce 553 | NC_003279:7879125   | 1     | * | * | NA | IG | -             |
| Ce 574 | NC_003284:8869901   | 1     | * | * | NA | EX | ubc-21        |
| Ce 523 | NC_003284:8900564   | 1     | * | * | NA | IG | -             |
| Ce 529 | NC_003284:8900564   | 1     | * | * | NA | IG | -             |
| Ce 529 | NC_003281:8910563   | 1     | * | * | NA | EX | unc-32        |
| Ce 523 | NC_003280:8916809   | -1    | * | * | NA | IG | -             |
| Ce 538 | NC_003284:9748181   | -1    | * | * | NA | EX | him-4         |
| Ce 574 | NC_003284:9999442   | 1     | * | * | NA | IG | -             |
| Ce 523 | NC_003284:10298182  | -1    | * | * | NA | IG | -             |
| Ce 574 | NC_003280:10830982  | 1     | * | * | NA | EX | mix-1         |
| Ce 574 | NC_003284:10841781  | -1    | * | * | NA | IG | -             |
| Ce 529 | NC_003283:10866552  | -1    | * | * | NA | IG | -             |
| Ce 526 | NC_003281:10896013  | 1     | * | * | NA | IG | -             |
| Ce 574 | NC_003280:11318332  | -1    | * | * | NA | IG | -             |
| Ce 529 | NC_003280:11769647  | 1     | * | * | NA | IG | -             |
| Ce 574 | NC_003284:11773775  | -1    | * | * | NA | IG | -             |
| Ce 538 | NC_003281:12059763  | 1     | * | * | NA | IG | -             |
| Ce 574 | NC_003282:12335742  | -1    | * | * | NA | EX | -             |
| Ce 538 | NC_003284:12435505  | 1     | * | * | NA | EX | T18D3.7       |
| Ce 574 | NC_003284:12435505  | 1     | * | * | NA | EX | T18D3.7       |
| Ce 526 | NC_003281:12672223  | 1     | * | * | NA | EX | taf-7.2       |
| Ce 523 | NC_003282:12883827  | 1     | * | * | NA | IG | -             |
| Ce 538 | NC_003282:13450032  | 1     | * | * | NA | EX | -             |
| Ce 538 | NC_003279:13644260  | -1    | * | * | NA | EX | dkf-1         |
| Ce 523 | NC_003282:13764410  | 1     | * | * | NA | EX | sorb-1        |
| Ce 538 | NC_003282:13793521  | -1    | * | * | NA | EX | Y45F10D.7     |
| Ce 538 | NC_003284:14075543  | -2    | * | * | NA | EX | C33G3.4       |
| Ce 574 | NC_003279:14169356  | 1     | * | * | NA | IG | -             |
| Ce 538 | NC_003284:14523332  | -1    | * | * | NA | IG | -             |
| Ce 574 | NC_003283:14524355  | 1     | * | * | NA | IG | -             |
| Ce 529 | NC_003280:15051037  | -1    | * | * | NA | IG | -             |
| Ce 529 | NC_003283:15835625  | 1     | * | * | NA | IG | -             |
| Ce 538 | NC_003283:18170182  | 1     | * | * | NA | EX | C14A6.8       |
| Ec 65  | NC_000913.2:19777   | -18   | - | - | *  | IG | -             |
| Ec 29  | NC_000913.2:59170   | -1    | * | * | *  | IG | -             |
| Ec 63  | NC_000913.2:117578  | -14   | * | * | *  | IG | -             |
| Ec 93  | NC_000913.2:220480  | -3    | * | * | *  | EX | DL-methionine |
| Ec 45  | NC_000913.2:293748  | -1    | * | * | *  | EX | CP4-6         |
| Ec 28  | NC_000913.2:353860  | -94   | - | - | *  | IG | -             |
| Ec 35  | NC_000913.2:566008  | -1250 | - | - | *  | IG | -             |
| Ec 65  | NC_000913.2:573676  | -137  | - | - | *  | IG | -             |
| Ec 74  | NC_000913.2:681083  | -1    | * | * | *  | EX | Hsp70         |
| Ec 17  | NC_000913.2:1003376 | -1    | * | * | *  | EX | putative      |
| Ec 38  | NC_000913.2:1197676 | 8     | - | - | *  | IG | -             |
| Ec 12  | NC_000913.2:1211303 | 1     | * | * | *  | IG | -             |
| Ec 39  | NC_000913.2:1211303 | 1     | * | * | *  | IG | -             |
| Ec 28  | NC_000913.2:1211303 | -1    | * | * | *  | IG | -             |
| Ec 71  | NC_000913.2:1211303 | 1     | * | * | *  | IG | -             |
| Ec 60  | NC_000913.2:1211303 | 1     | * | * | *  | IG | -             |
| Ec 65  | NC_000913.2:1211303 | 1     | * | * | *  | IG | -             |
| Ec 48  | NC_000913.2:1211303 | 1     | * | * | *  | IG | -             |

|        |                     |     |   |   |   |    |                     |
|--------|---------------------|-----|---|---|---|----|---------------------|
| Ec 63  | NC_000913.2:1211303 | 1   | * | * | * | IG | -                   |
| Ec 14  | NC_000913.2:1419655 | -1  | * | * | * | EX | Rac                 |
| Ec 45  | NC_000913.2:1419655 | -1  | * | * | * | EX | Rac                 |
| Ec 6   | NC_000913.2:1491025 | -18 | * | * | * | EX | methyl-accepting    |
| Ec 39  | NC_000913.2:1592148 | -1  | * | * | * | IG | -                   |
| Ec 46  | NC_000913.2:1811456 | 1   | * | * | * | EX | cell                |
| Ec 38  | NC_000913.2:1869850 | -1  | * | * | * | EX | putative            |
| Ec 86  | NC_000913.2:1918710 | 1   | * | * | * | EX | 16S                 |
| Ec 91  | NC_000913.2:1970624 | 1   | * | * | * | EX | methyl-accepting    |
| Ec 89  | NC_000913.2:1970624 | 1   | * | * | * | EX | methyl-accepting    |
| Ec 44  | NC_000913.2:2162577 | -4  | * | * | * | EX | DNA-binding         |
| Ec 50  | NC_000913.2:2255606 | -6  | * | * | * | EX | pseudouridine       |
| Ec 6   | NC_000913.2:2404562 | 9   | * | * | * | EX | DNA-binding         |
| Ec 9   | NC_000913.2:2558975 | -24 | - | - | * | IG | -                   |
| Ec 53  | NC_000913.2:2558975 | -24 | - | - | * | IG | -                   |
| Ec 9   | NC_000913.2:2558997 | -1  | * | * | - | IG | -                   |
| Ec 53  | NC_000913.2:2558997 | -1  | * | * | - | IG | -                   |
| Ec 37  | NC_000913.2:2763433 | -8  | * | * | * | IG | -                   |
| Ec 81  | NC_000913.2:2763433 | 8   | - | - | * | IG | -                   |
| Ec 14  | NC_000913.2:2763433 | 8   | - | - | * | IG | -                   |
| Ec 93  | NC_000913.2:2763433 | -24 | - | - | * | IG | -                   |
| Ec 62  | NC_000913.2:2792402 | -1  | * | * | * | EX | gamma-aminobutyrate |
| Ec 50  | NC_000913.2:2970933 | -69 | - | - | * | EX | lysophospholipid    |
| Ec 80  | NC_000913.2:2993775 | -1  | * | * | * | IG | -                   |
| Ec 96  | NC_000913.2:3133909 | -1  | * | * | * | EX | phosphate           |
| Ec 44  | NC_000913.2:3188268 | -1  | * | * | * | EX | putative            |
| Ec 93  | NC_000913.2:3244075 | -12 | * | * | * | EX | hexuronate          |
| Ec 14  | NC_000913.2:3795056 | -1  | * | * | * | EX | O-antigen           |
| Ec 100 | NC_000913.2:3939973 | 1   | - | - | * | IG | -                   |
| Ec 100 | NC_000913.2:4034218 | 1   | - | - | * | IG | -                   |
| Ec 99  | NC_000913.2:4106780 | 1   | * | * | * | IG | -                   |
| Ec 12  | NC_000913.2:4282422 | -1  | * | * | * | EX | acetate             |
| Ec 59  | NC_000913.2:4311169 | 1   | * | * | * | IG | -                   |
| Ec 45  | NC_000913.2:4432572 | 39  | - | - | * | IG | -                   |
| Ec 45  | NC_000913.2:4604345 | -1  | * | * | * | IG | -                   |
| Mf 26  | NC_006055.1:1349    | -1  | * | * | * | IG | -                   |
| Mf 59  | NC_006055.1:32099   | 1   | * | * | * | IG | -                   |
| Mf 85  | NC_006055.1:44016   | 1   | * | * | * | EX | transcriptional     |
| Mf 11  | NC_006055.1:44576   | -2  | * | * | * | IG | -                   |
| Mf 92  | NC_006055.1:44576   | -1  | * | * | - | IG | -                   |
| Mf 59  | NC_006055.1:44576   | -1  | * | * | - | IG | -                   |
| Mf 62  | NC_006055.1:44576   | -1  | * | * | - | IG | -                   |
| Mf 57  | NC_006055.1:44576   | -1  | * | * | - | IG | -                   |
| Mf 6   | NC_006055.1:51562   | -1  | * | * | * | EX | NADH                |
| Mf 62  | NC_006055.1:64141   | -1  | * | * | * | EX | Mg2+                |
| Mf 83  | NC_006055.1:64198   | -1  | * | * | * | EX | Mg2+                |
| Mf 41  | NC_006055.1:85079   | -1  | * | * | * | EX | prolipoprotein      |
| Mf 47  | NC_006055.1:124252  | 1   | * | * | * | EX | lysophospholipase   |
| Mf 92  | NC_006055.1:125589  | 2   | * | * | * | EX | DNA                 |
| Mf 55  | NC_006055.1:180163  | 1   | * | * | * | EX | substrate           |
| Mf 68  | NC_006055.1:187300  | 1   | * | * | * | EX | K+                  |
| Mf 11  | NC_006055.1:198193  | 1   | * | * | * | EX | substrate           |
| Mf 49  | NC_006055.1:208454  | -11 | * | * | * | IG | -                   |
| Mf 31  | NC_006055.1:210238  | 1   | * | * | * | EX | fructose-specific   |
| Mf 39  | NC_006055.1:210238  | 1   | * | * | * | EX | fructose-specific   |
| Mf 68  | NC_006055.1:210302  | -1  | * | * | * | EX | fructose-specific   |
| Mf 6   | NC_006055.1:212185  | 5   | * | * | * | EX | fructose-specific   |
| Mf 42  | NC_006055.1:229215  | 1   | * | * | * | EX | DNA                 |
| Mf 92  | NC_006055.1:246712  | 1   | * | * | * | EX | serine/threonine    |

|       |                    |       |   |   |   |    |                                  |
|-------|--------------------|-------|---|---|---|----|----------------------------------|
| Mf 23 | NC_006055.1:247723 | 1     | * | * | * | EX | serine/threonine                 |
| Mf 67 | NC_006055.1:251013 | 1     | * | * | * | IG | -                                |
| Mf 65 | NC_006055.1:251037 | 1     | * | * | * | IG | -                                |
| Mf 92 | NC_006055.1:259234 | -1    | * | * | * | IG | -                                |
| Mf 67 | NC_006055.1:263856 | -1    | * | * | * | EX | phosphate                        |
| Mf 59 | NC_006055.1:271602 | 6     | * | * | * | EX | uracil-DNA                       |
| Mf 39 | NC_006055.1:284202 | -2    | * | * | * | IG | -                                |
| Mf 56 | NC_006055.1:284202 | -4    | * | * | * | IG | -                                |
| Mf 26 | NC_006055.1:285396 | 1     | * | * | * | EX | hypothetical                     |
| Mf 49 | NC_006055.1:292616 | -6    | * | * | * | EX | substrate                        |
| Mf 56 | NC_006055.1:292616 | -6    | * | * | * | EX | substrate                        |
| Mf 67 | NC_006055.1:314152 | -1    | * | * | * | EX | hypothetical                     |
| Mf 67 | NC_006055.1:344335 | 1     | * | * | * | EX | ATP/GTP                          |
| Mf 31 | NC_006055.1:350681 | 1     | * | * | * | EX | hypothetical                     |
| Mf 57 | NC_006055.1:351102 | -1    | * | * | * | EX | hypothetical                     |
| Mf 50 | NC_006055.1:351379 | 1     | * | * | * | EX | hypothetical                     |
| Mf 90 | NC_006055.1:352376 | -1    | * | * | * | EX | hypothetical                     |
| Mf 83 | NC_006055.1:352427 | 1     | * | * | * | EX | hypothetical                     |
| Mf 83 | NC_006055.1:354321 | -1    | * | * | * | EX | type                             |
| Mf 49 | NC_006055.1:354321 | -1    | * | * | * | EX | type                             |
| Mf 58 | NC_006055.1:362283 | -1    | * | * | * | EX | beta-glucoside                   |
| Mf 58 | NC_006055.1:373939 | -1672 | - | - | * | EX | beta-glucoside                   |
| Mf 57 | NC_006055.1:377897 | 5     | * | * | * | EX | exodeoxyribonuclease             |
| Mf 19 | NC_006055.1:386317 | -1    | * | * | * | EX | DNA                              |
| Mf 99 | NC_006055.1:386611 | -1    | * | * | * | EX | DNA                              |
| Mf 42 | NC_006055.1:391758 | 1     | * | * | * | EX | hypothetical                     |
| Mf 99 | NC_006055.1:396957 | 1     | * | * | * | IG | -                                |
| Mf 23 | NC_006055.1:399947 | 1     | * | * | * | EX | hypothetical                     |
| Mf 57 | NC_006055.1:400304 | -1    | * | * | * | EX | hypothetical                     |
| Mf 58 | NC_006055.1:407328 | -1    | * | * | * | EX | hypothetical                     |
| Mf 59 | NC_006055.1:421014 | 1     | * | * | * | EX | hypothetical                     |
| Mf 11 | NC_006055.1:422354 | -1    | * | * | * | IG | -                                |
| Mf 99 | NC_006055.1:437601 | -2    | * | * | - | IG | -                                |
| Mf 55 | NC_006055.1:453094 | -3    | * | * | * | EX | cell                             |
| Mf 14 | NC_006055.1:454295 | 1     | * | * | * | EX | hypothetical                     |
| Mf 6  | NC_006055.1:455904 | 2     | * | * | * | IG | -                                |
| Mf 83 | NC_006055.1:473827 | 1     | * | * | * | EX | class                            |
| Mf 76 | NC_006055.1:476372 | -1    | * | * | * | EX | translation                      |
| Mf 65 | NC_006055.1:489521 | 1     | * | * | * | EX | ATPase                           |
| Mf 76 | NC_006055.1:499619 | 2     | * | * | * | EX | trehalose/sucrose/beta-glucoside |
| Mf 92 | NC_006055.1:523043 | -1    | * | * | - | IG | -                                |
| Mf 76 | NC_006055.1:523043 | -1    | * | * | - | IG | -                                |
| Mf 99 | NC_006055.1:523043 | -3    | * | * | * | IG | -                                |
| Mf 14 | NC_006055.1:523043 | -1    | * | * | - | IG | -                                |
| Mf 85 | NC_006055.1:523043 | -1    | * | * | - | IG | -                                |
| Mf 56 | NC_006055.1:523043 | -1    | * | * | - | IG | -                                |
| Mf 83 | NC_006055.1:523043 | -1    | * | * | - | IG | -                                |
| Mf 68 | NC_006055.1:528050 | -3    | * | * | * | EX | histone-like/ribosomal-like      |
| Mf 42 | NC_006055.1:528050 | -3    | * | * | * | EX | histone-like/ribosomal-like      |
| Mf 65 | NC_006055.1:528050 | 3     | * | * | * | EX | histone-like/ribosomal-like      |
| Mf 55 | NC_006055.1:528050 | -3    | * | * | * | EX | histone-like/ribosomal-like      |
| Mf 12 | NC_006055.1:528050 | -3    | * | * | * | EX | histone-like/ribosomal-like      |
| Mf 23 | NC_006055.1:528050 | -3    | * | * | * | EX | histone-like/ribosomal-like      |
| Mf 6  | NC_006055.1:528050 | 3     | * | * | * | EX | histone-like/ribosomal-like      |
| Mf 19 | NC_006055.1:528050 | -3    | * | * | * | EX | histone-like/ribosomal-like      |
| Mf 41 | NC_006055.1:528050 | -3    | * | * | * | EX | histone-like/ribosomal-like      |
| Mf 56 | NC_006055.1:528050 | -3    | * | * | * | EX | histone-like/ribosomal-like      |
| Mf 47 | NC_006055.1:528050 | -3    | * | * | * | EX | histone-like/ribosomal-like      |
| Mf 99 | NC_006055.1:529274 | -3    | * | * | - | IG | -                                |

|       |                    |        |   |   |   |    |                                            |
|-------|--------------------|--------|---|---|---|----|--------------------------------------------|
| Mf 57 | NC_006055.1:529274 | -4     | * | * | - | IG | -                                          |
| Mf 23 | NC_006055.1:533891 | 1      | * | * | - | IG | -                                          |
| Mf 39 | NC_006055.1:533891 | 1      | * | * | - | IG | -                                          |
| Mf 56 | NC_006055.1:533891 | -1     | * | * | - | IG | -                                          |
| Mf 11 | NC_006055.1:533891 | -1     | * | * | - | IG | -                                          |
| Mf 14 | NC_006055.1:533891 | 1      | * | * | - | IG | -                                          |
| Mf 41 | NC_006055.1:533891 | -1     | * | * | - | IG | -                                          |
| Mf 99 | NC_006055.1:548681 | -1     | * | * | - | IG | -                                          |
| Mf 12 | NC_006055.1:570619 | -1     | * | * | * | EX | hypothetical                               |
| Mf 57 | NC_006055.1:577206 | 1      | * | * | * | EX | hypothetical                               |
| Mf 14 | NC_006055.1:577823 | -9     | * | * | * | EX | hypothetical                               |
| Mf 67 | NC_006055.1:577890 | 1      | * | * | * | EX | hypothetical                               |
| Mf 41 | NC_006055.1:596911 | 1      | * | * | * | IG | -                                          |
| Mf 76 | NC_006055.1:598630 | 1      | * | * | * | EX | hypothetical                               |
| Mf 41 | NC_006055.1:610523 | 1      | * | * | * | IG | -                                          |
| Mf 58 | NC_006055.1:610523 | 2      | * | * | * | IG | -                                          |
| Mf 55 | NC_006055.1:610523 | 1      | * | * | * | IG | -                                          |
| Mf 50 | NC_006055.1:617172 | -78    | - | - | * | EX | ATP-dependent                              |
| Mf 42 | NC_006055.1:640996 | 1      | * | * | * | EX | deoxynucleoside                            |
| Mf 14 | NC_006055.1:668848 | 1      | * | * | * | IG | -                                          |
| Mf 49 | NC_006055.1:668848 | -1     | * | * | * | IG | -                                          |
| Mf 42 | NC_006055.1:668848 | -1     | * | * | * | IG | -                                          |
| Mf 62 | NC_006055.1:676726 | 3      | * | * | * | EX | formamidopyrimidine-DNA                    |
| Mf 39 | NC_006055.1:703756 | -122   | - | - | * | EX | hypothetical                               |
| Mf 19 | NC_006055.1:704646 | 1      | * | * | * | EX | beta-lactamase                             |
| Mf 19 | NC_006055.1:709236 | -1     | * | * | * | IG | -                                          |
| Mf 67 | NC_006055.1:715252 | 1      | * | * | * | EX | hypothetical                               |
| Mf 41 | NC_006055.1:715816 | -1     | * | * | * | EX | hypothetical                               |
| Mf 19 | NC_006055.1:719113 | -1     | * | * | * | EX | HAD-superfamily                            |
| Mf 49 | NC_006055.1:723905 | 1      | * | * | * | IG | -                                          |
| Mf 39 | NC_006055.1:727009 | 1      | * | * | * | EX | substrate                                  |
| Mf 31 | NC_006055.1:727009 | 1      | * | * | * | EX | substrate                                  |
| Mf 47 | NC_006055.1:727917 | -1     | * | * | * | IG | -                                          |
| Mf 23 | NC_006055.1:734522 | -1     | * | * | * | EX | cardiolipin                                |
| Mf 56 | NC_006055.1:739216 | -1     | * | * | * | EX | polypeptide                                |
| Mf 14 | NC_006055.1:749645 | -1     | * | * | * | IG | -                                          |
| Mf 93 | NC_006055.1:751392 | -1     | * | * | * | EX | multidrug                                  |
| Mf 58 | NC_006055.1:752865 | 1      | * | * | * | IG | -                                          |
| Mf 92 | NC_006055.1:754690 | -1     | * | * | * | EX | RNA                                        |
| Mf 56 | NC_006055.1:773113 | -1     | * | * | * | EX | ribose                                     |
| Mf 58 | NC_006055.1:773484 | -1     | * | * | * | EX | ribose                                     |
| Mf 31 | NC_006055.1:775316 | 3      | * | * | * | EX | ribose                                     |
| Mf 39 | NC_006055.1:775316 | 3      | * | * | * | EX | ribose                                     |
| Mf 26 | NC_006055.1:778327 | -1     | * | * | * | IG | -                                          |
| Mf 85 | NC_006055.1:785039 | 5      | * | * | * | EX | S-adenosylmethionine:2-demethylmenaquinone |
| Mf 56 | NC_006055.1:785568 | 1      | * | * | * | EX | S-adenosylmethionine:2-demethylmenaquinone |
| Se 4  | NC_005005.1:54     | 1      | - | - | * | IG | -                                          |
| Se 7  | NC_005005.1:54     | 1      | - | - | * | IG | -                                          |
| Se 2  | NC_005005.1:54     | 1      | - | - | * | IG | -                                          |
| Se 11 | NC_005005.1:54     | 1      | - | - | * | IG | -                                          |
| Se 3  | NC_005005.1:54     | 1      | - | - | * | IG | -                                          |
| Se 12 | NC_005005.1:54     | 1      | - | - | * | IG | -                                          |
| Se 8  | NC_005005.1:54     | 1      | - | - | * | IG | -                                          |
| Se 10 | NC_005005.1:54     | 1      | - | - | * | IG | -                                          |
| Se 13 | NC_005005.1:54     | 1      | - | - | * | IG | -                                          |
| Se 13 | NC_005005.1:3346   | -12    | * | * | * | EX | hypothetical                               |
| Se 4  | NC_005005.1:10527  | 1      | * | * | * | IG | -                                          |
| Se 75 | NC_005005.1:10527  | 1      | * | * | * | IG | -                                          |
| Se 50 | NC_004461.1:51507  | -15481 | - | - | * | IG | -                                          |



|       |                         |        |   |   |   |    |                                |
|-------|-------------------------|--------|---|---|---|----|--------------------------------|
| Se 13 | NC_004461.1:75823       | -1876  | - | - | * | EX | transposase                    |
| Se 10 | NC_004461.1:133408      | 1      | * | * | * | IG | -                              |
| Se 67 | NC_004461.1:373396      | -2     | * | * | - | IG | -                              |
| Se 39 | NC_004461.1:462055      | 20     | - | - | * | EX | hypothetical                   |
| Se 39 | NC_004461.1:485768      | 1      | * | * | * | EX | hypothetical                   |
| Se 34 | NC_004461.1:485768      | 1      | * | * | * | EX | hypothetical                   |
| Se 66 | NC_004461.1:578337      | -1     | * | * | * | EX | hypothetical                   |
| Se 65 | NC_004461.1:578337      | -1     | * | * | * | EX | hypothetical                   |
| Se 10 | NC_004461.1:740878      | -1     | - | - | * | IG | -                              |
| Se 8  | NC_004461.1:740878      | -1     | - | - | * | IG | -                              |
| Se 2  | NC_004461.1:796289      | 2      | * | * | * | EX | manganese                      |
| Se 12 | NC_004461.1:912691      | 2      | * | * | * | IG | -                              |
| Se 39 | NC_004461.1:948449      | -132   | - | - | * | EX | transcription                  |
| Se 67 | NC_004461.1:1206471     | -24    | * | * | * | EX | elastin                        |
| Se 39 | NC_004461.1:1208360     | -1     | * | * | * | EX | ATP-dependent                  |
| Se 75 | NC_004461.1:1501509     | -3601  | - | - | * | IG | -                              |
| Se 8  | NC_004461.1:1577662     | -1     | * | * | * | IG | -                              |
| Se 67 | NC_004461.1:1592951     | 1      | * | * | * | IG | -                              |
| Se 75 | NC_004461.1:1593739     | 1      | * | * | * | IG | -                              |
| Se 70 | NC_004461.1:1594245     | -1     | * | * | - | IG | -                              |
| Se 66 | NC_004461.1:1666743     | 1      | * | * | * | EX | hypothetical                   |
| Se 50 | NC_004461.1:1717590     | -1     | * | * | * | EX | threonine                      |
| Se 12 | NC_004461.1:1813275     | 1      | * | * | * | IG | -                              |
| Se 11 | NC_004461.1:1843381     | 1      | * | * | * | EX | PTS                            |
| Se 69 | NC_004461.1:1877753     | -1     | * | * | * | EX | acriflavin                     |
| Se 34 | NC_004461.1:1917547     | -1     | * | * | - | EX | hypothetical                   |
| Se 34 | NC_004461.1:1917550     | -1     | - | - | * | EX | hypothetical                   |
| Se 34 | NC_004461.1:2217486     | -5     | - | - | * | IG | -                              |
| Se 39 | NC_004461.1:2217486     | -5     | - | - | * | IG | -                              |
| Se 66 | NC_004461.1:2401344     | -2     | * | * | * | EX | poly                           |
| Se 65 | NC_004461.1:2401344     | -2     | * | * | * | EX | poly                           |
| Se 12 | NC_004461.1:2467399     | 9      | * | * | * | IG | -                              |
| Vc 57 | NZ_AAUT01000005.1:992   | -1     | * | * | - | IG | -                              |
| Vc 63 | NZ_AAUT01000016.1:3729  | -1     | * | * | * | EX | hypothetical                   |
| Vc 29 | NZ_AAUT01000075.1:4429  | 1      | * | * | - | IG | -                              |
| Vc 49 | NZ_AAUT01000120.1:4583  | -1     | * | * | - | EX | hypothetical                   |
| Vc 53 | NZ_AAUT01000046.1:6590  | -12064 | - | - | * | EX | sensor                         |
| Vc 23 | NZ_AAUT01000026.1:7390  | -13    | * | * | * | EX | hypothetical                   |
| Vc 58 | NZ_AAUT01000027.1:10961 | -4     | * | * | * | EX | long-chain                     |
| Vc 65 | NZ_AAUT01000047.1:11646 | -1     | * | * | * | EX | superoxide                     |
| Vc 39 | NZ_AAUT01000046.1:19581 | -21    | * | * | * | EX | RTX                            |
| Vc 32 | NZ_AAUT01000059.1:19844 | -1     | - | - | * | IG | -                              |
| Vc 70 | NZ_AAUT01000023.1:23212 | -40    | - | - | * | EX | sigma-54                       |
| Vc 47 | NZ_AAUT01000053.1:25517 | 1      | * | * | - | EX | hypothetical                   |
| Vc 53 | NZ_AAUT01000018.1:31753 | 16     | - | - | * | IG | -                              |
| Vc 26 | NZ_AAUT01000041.1:32998 | -10    | * | * | * | EX | hypothetical                   |
| Vc 25 | NZ_AAUT01000041.1:32998 | -10    | * | * | - | EX | hypothetical                   |
| Vc 7  | NZ_AAUT01000011.1:33355 | -1     | * | * | * | IG | -                              |
| Vc 51 | NZ_AAUT01000001.1:34071 | -12    | * | * | * | EX | hydroxymethylglutaryl-coenzyme |
| Vc 4  | NZ_AAUT01000033.1:35325 | -1     | * | * | * | EX | cell                           |
| Vc 1  | NZ_AAUT01000005.1:62972 | -6424  | - | - | * | IG | -                              |
| Vc 9  | NZ_AAUT01000005.1:87636 | -536   | - | - | * | IG | -                              |

---
