# Supplementary material for: Evolution of the Insertion-Deletion Mutation Rate Across the Tree of Life
Source: PubMed Central journal article supplement (PMC4978911; doi:10.1534/g3.116.030890), 2016-06-15
Supplement: supp_g3.116.030890_FigureS3.pdf [file supp_g3.116.030890_FigureS3.pdf]

**A**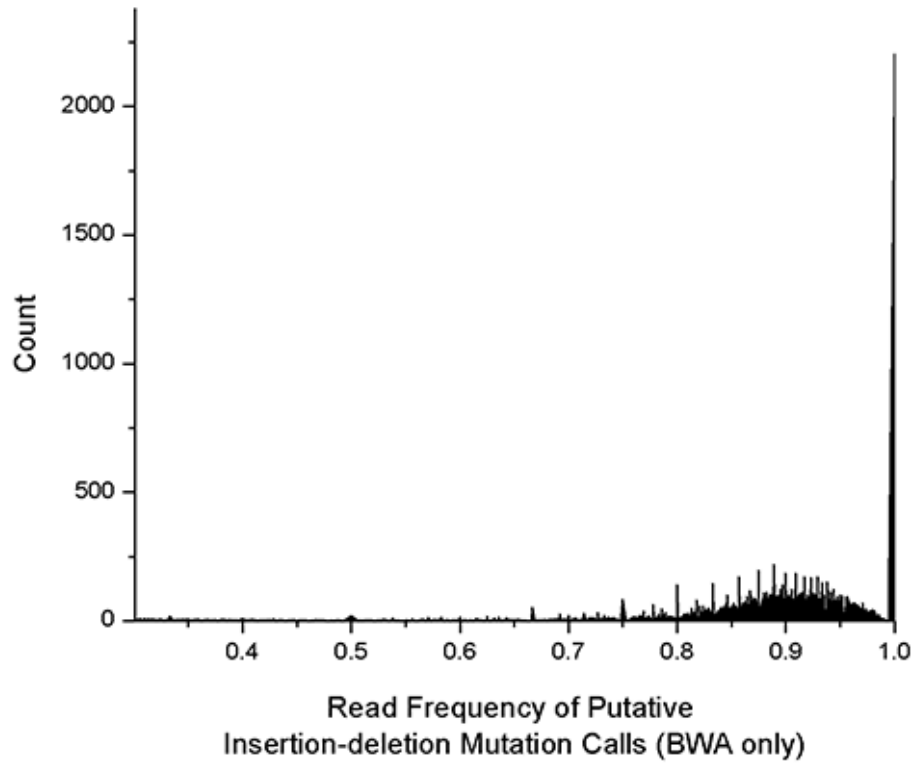**B**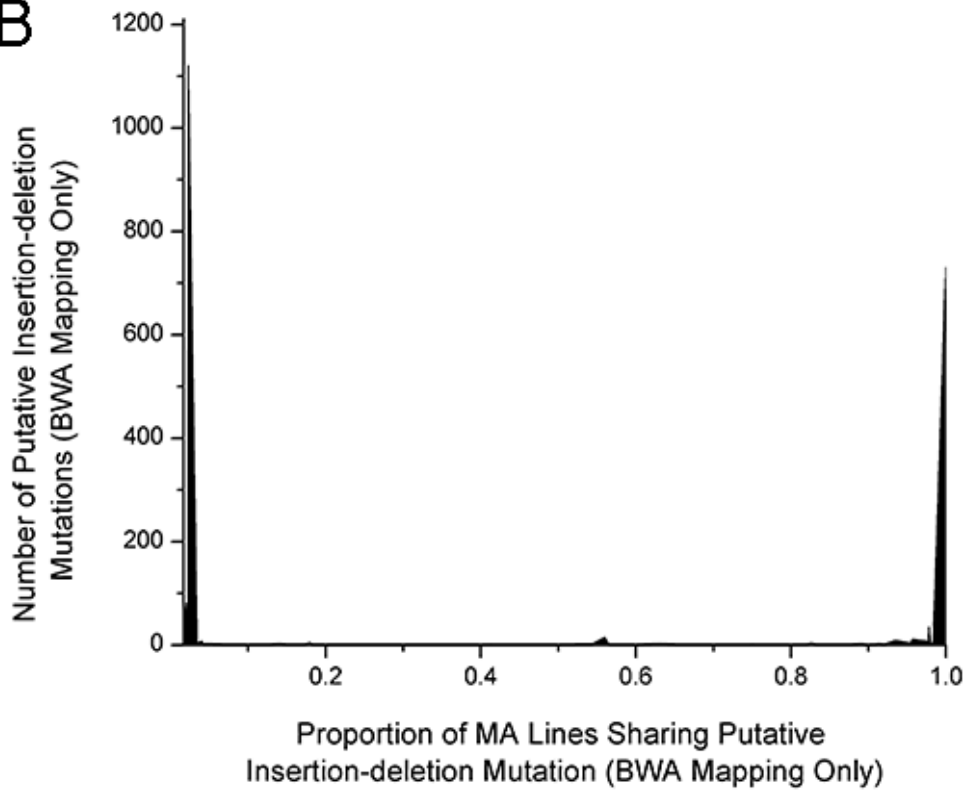

**Figure S3.** **A)** Distribution of the read frequency for insertion-deletion mutation calls using BWA mapping. Read frequency is determined by the number of reads representing the putative insertion-deletion mutation call at a site, divided by the total number of reads spanning that site. The total number includes counts from *Agrobacterium tumefaciens*, *Bacillus subtilis*, *Escherichia coli*, *Mesoplasma florum*, *Staphylococcus epidermidis*, and *Vibrio cholerae* MA experiments prior to filtering (see Mutation Calling). **B)** Bimodal distribution displaying the proportion of MA lines sharing the same (size and motif) putative insertion-deletion mutation call using BWA mapping for same organisms.
