# Supplementary material for: Evolution of the Insertion-Deletion Mutation Rate Across the Tree of Life
Source: PubMed Central journal article supplement (PMC4978911; doi:10.1534/g3.116.030890), 2016-06-15
Supplement: supp_g3.116.030890_FigureS4.pdf [file supp_g3.116.030890_FigureS4.pdf]

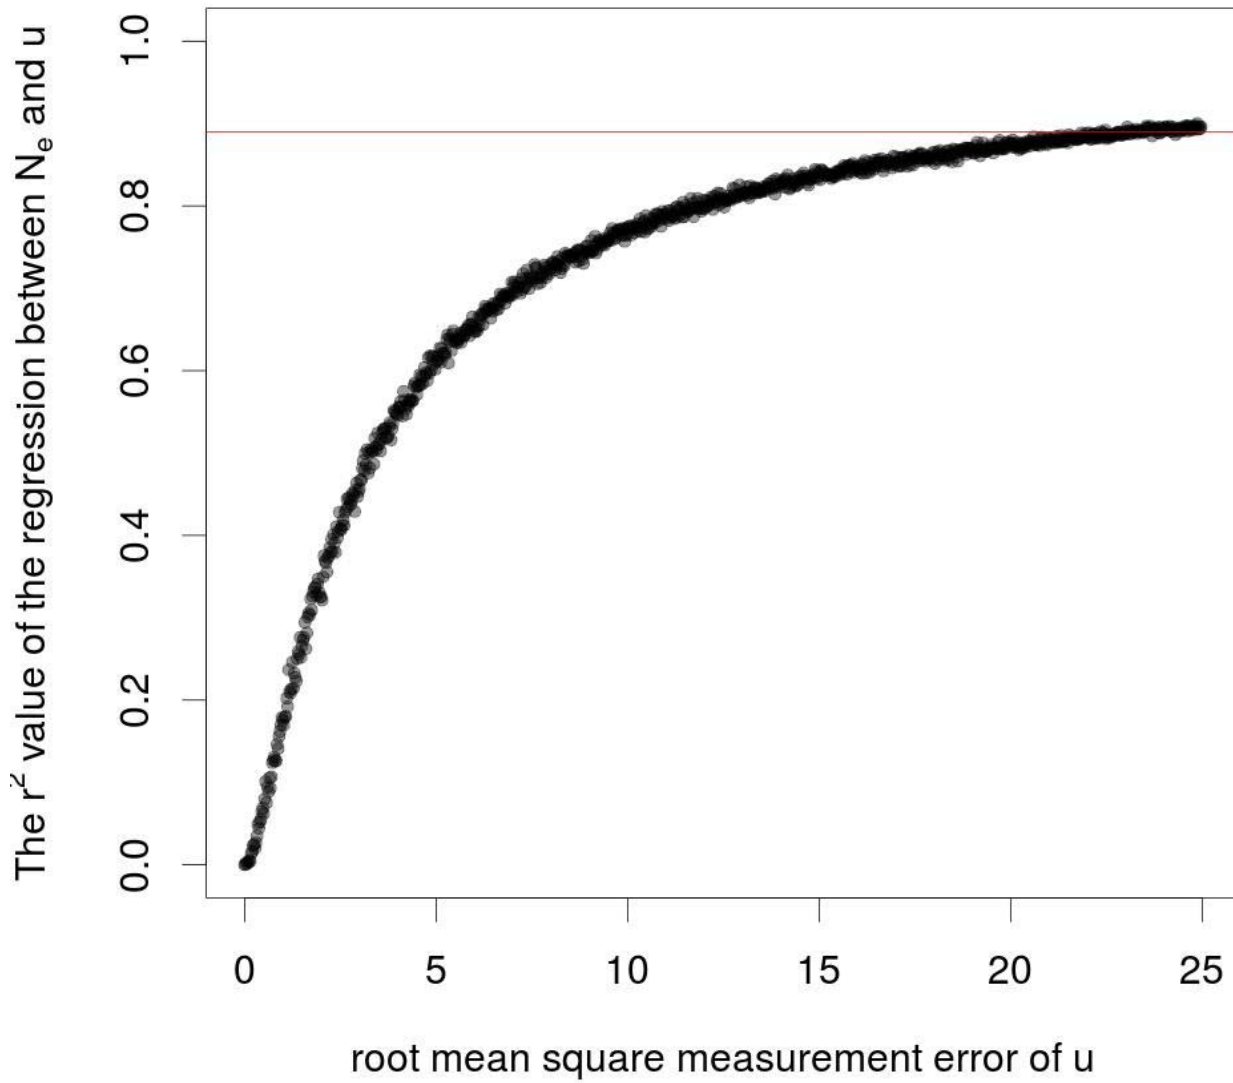

Figure S4: The  $r^2$  value of the regression between  $N_e$  and  $U_{id}$  under the null hypothesis, as a function of the root mean square error (RMSE) of estimates of  $u_{bs}$ . Errors in the estimate of  $u_{bs}$  and  $u_{id}$  are assumed to be identical. The errors are assumed to be log normally distributed (see main text). The horizontal red line is drawn at  $t$  value of 0.89, the  $r^2$  of the observed data.
